# Supplementary material for: Cu-catalyzed aerobic oxidative dehydrogenation of tertiary indolines to indoles using azo/hydrazide redox
Source: Royal Society of Chemistry journal article supplement (doi:10.1039/d3nj05172b), 2024-01-01

## Supporting Information for

# Cu-catalyzed aerobic oxidative dehydrogenation of tertiary indolines to indoles using azo/hydrazide redox

Santanu Maiti, Jun Soo Kim, and Jinho Kim\*

*\*Department of Chemistry, and Research Institute of Basic Sciences, Incheon National University,*

*119 Academy-ro, Yeonsu-gu, Incheon 22012, Republic of Korea.*

jinho@inu.ac.kr

### Table of Contents

---

|                                                                                                        |     |
|--------------------------------------------------------------------------------------------------------|-----|
| 1. General considerations                                                                              | S1  |
| 2. Preparation of indolines (starting materials)                                                       | S2  |
| 3. Characterizations of newly synthesized indolines                                                    | S5  |
| 4. Optimization of aerobic oxidative dehydrogenation of tertiary indolines                             | S6  |
| 5. General procedure for Cu-catalyzed dehydrogenation of tertiary indolines                            | S6  |
| 6. Scale-up process for 5-methoxy-1-methyl-1 <i>H</i> -indole                                          | S13 |
| 7. Synthesis of indolines <b>4ag</b> and <b>4ah</b> for the synthesis of biologically active compounds | S13 |
| 8. Characterizations of <b>5ag</b> and <b>5ah</b>                                                      | S13 |
| 9. References                                                                                          | S14 |
| 10. <sup>1</sup> H, <sup>13</sup> C, and <sup>19</sup> F NMR spectra                                   | S16 |

---

### 1. General Considerations

All commercially available compounds and solvents were purchased and used as received unless otherwise noted. Analytical thin-layer chromatography (TLC) was performed on precoated silica gel 60 F254 plates. Visualization on TLC was achieved by the use of UV light (254 nm) and treatment with phosphomolybdic acid, *p*-anisaldehyde, KMnO<sub>4</sub>, or Vanillin stain followed by heating. Flash chromatography was performed using silica gel (particle size 40–63 μm, 230–400 mesh). <sup>1</sup>H, <sup>13</sup>C, and <sup>19</sup>F NMR spectra were recorded on 300 MHz NMR (300 MHz for <sup>1</sup>H, 75 MHz for <sup>13</sup>C, 282 MHz for <sup>19</sup>F), 400 MHz NMR (400 MHz for <sup>1</sup>H, 101 MHz for <sup>13</sup>C), or 850 MHz NMR (850 MHz for <sup>1</sup>H, 214 MHz for <sup>13</sup>C). Chemical shift values are given in parts per million relative to internal TMS (0.00 ppm for <sup>1</sup>H) or CDCl<sub>3</sub> (77.06 ppm for <sup>13</sup>C). The following abbreviations were used to describe peak splitting patterns when appropriate: br = broad, s = singlet, d = doublet, t = triplet, q = quartet, p = pentet, m = multiplet, dd = double of doublet, dt = double of triplet, td = triple of doublet. Coupling constants, *J*, were reported in hertz unit (Hz). High-resolution mass spectra were obtained from the Korea Basic Science Institute (Daegu) by using EI method and magnetic sector mass analyzer. Melting points were determined on a digital melting point apparatus and temperatures were uncorrected.

## 2. Preparation of indolines (starting materials)

### Synthesis of 4a–4v

Indolines **4a–4v** were prepared by methylation<sup>1</sup> of indole followed by reduction.<sup>2</sup>

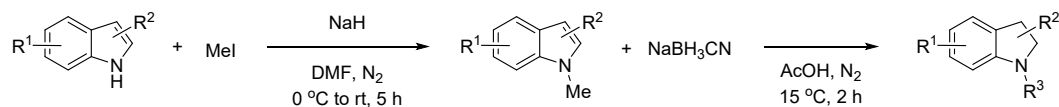

**Methylation** A 50 mL flame-dried round-bottom flask, which was equipped with a magnetic stir bar and charged with NaH (6.0 mmol, 60% suspension in mineral oil), was evacuated and backfilled with nitrogen (this process was repeated three times). After DMF (10 mL) was added at 0 °C, indole (5.0 mmol) in DMF (5.0 mL) was added dropwise. After the reaction mixture was stirred at room temperature for 1 h, MeI (6.0 mmol) was added dropwise to the mixture at 0 °C. Then, the reaction mixture was stirred at room temperature for 4 h. After the reaction was completed, ice water was added. The reaction mixture was extracted with EtOAc. The combined organic layers were washed with water and brine, dried over MgSO<sub>4</sub>, filtered, and concentrated on a rotary evaporator. The residue was purified by column chromatography on silica gel to give *N*-methyl indoles.

**Reduction** A 50 mL flame-dried round-bottom flask, which was equipped with a magnetic stir bar, was evacuated and backfilled with nitrogen (this process was repeated three times). After NaBH<sub>3</sub>CN (20 mmol) in acetic acid (10 mL) was added to the flask at 15 °C, the synthesized *N*-methyl indoles (4.0 mmol) in acetic acid (5.0 mL) was added dropwise. The reaction mixture was stirred at room temperature for 2 h. After the reaction was completed, most of the acetic acid was removed by a rotary evaporator. Then, 10 M NaOH aqueous solution was added to make pH = 9, and the reaction mixture was extracted with Et<sub>2</sub>O. The combined organic layers were washed with water and brine, dried over MgSO<sub>4</sub>, filtered, and concentrated on a rotary evaporator. The residue was purified by column chromatography on silica gel to give *N*-methyl indolines **4a–4v**.

### Synthesis of 4w and 4x

Indolines **4w** and **4x** were prepared by the known procedure.<sup>2</sup>

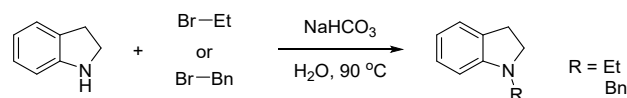

To a 50 mL round-bottom flask, which was equipped with a magnetic stir bar, NaHCO<sub>3</sub> (6.25 mmol) in 3 mL of H<sub>2</sub>O was added. After indoline (5.0 mmol) was added dropwise, the reaction mixture was stirred at 90 °C. After bromoethane (5.0 mmol) for **4w** or benzyl bromide (5.0 mmol) for **4x** was added dropwise for 1.5 h, the mixture was stirred for an additional 3.5 h. Then, water was added and the mixture was extracted with Et<sub>2</sub>O. The combined organic layers were dried over MgSO<sub>4</sub>, filtered, and concentrated on a rotary evaporator. The residue was purified by column chromatography on silica gel (EtOAc/Hx=1:10) to give the desired indolines.

### Synthesis of 4y

Indoline 4y was prepared by the known procedure.<sup>3</sup>

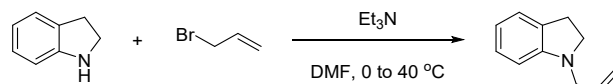

A 50 mL flame-dried round-bottom flask, which was equipped with a magnetic stir bar, was evacuated and backfilled with nitrogen (this process was repeated three times). Then, indoline (5.0 mmol), DMF (4.0 mL), and triethyl amine (7.5 mmol) were added sequentially at 0 °C. After allyl bromide (7.5 mmol) was added dropwise, the reaction mixture was stirred at 40 °C for 14 h. After completion of the reaction, ice-cold water was added, and the reaction mixture was extracted with EtOAc. The combined organic layers were dried over MgSO<sub>4</sub>, filtered, and concentrated on a rotary evaporator. The residue was purified by column chromatography on silica gel (EtOAc/Hx=1:10) to give a desired 1-allylindoline 4y.

### Synthesis of 4z

Indoline 4z was prepared by C-N cross coupling<sup>4</sup> of indole followed by reduction.

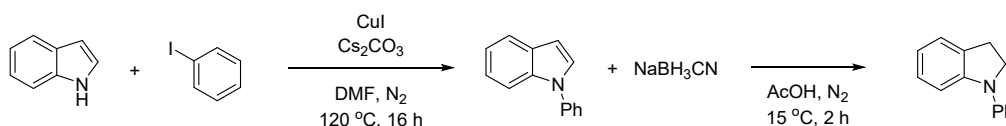

**C-N cross coupling** A 50 mL flame-dried round-bottom flask, which was equipped with a magnetic stir bar and charged with indole (10.0 mmol), CuI (2.0 mmol), and Cs<sub>2</sub>CO<sub>3</sub> (20 mmol) was evacuated and backfilled with nitrogen (this process was repeated three times). Phenyl iodide (7.1 mmol) in DMF (18 mL) was added, then the reaction mixture was vigorously stirred at 120 °C for 16 h. The reaction mixture was quenched with saturated aqueous NH<sub>4</sub>Cl solution and extracted with EtOAc. The combined organic layers were washed with water and brine, dried over MgSO<sub>4</sub>, filtered, and concentrated on a rotary evaporator. The crude product was purified by flash column chromatography on silica gel (pure PE) to give 1-phenylindole as a colorless oil.

**Reduction** See the reduction procedure in the **Synthesis of 4a–4v**.

### Synthesis of 4aa

Indolines 4aa was prepared by the known procedure.<sup>5</sup>

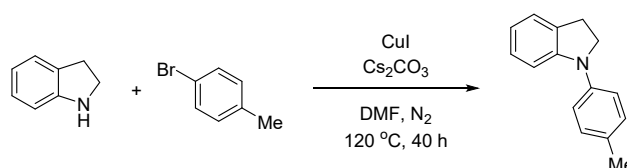

A 50 mL flame-dried round-bottom flask, which was equipped with a magnetic stirring bar and charged CuI (1.4 mmol) and Cs<sub>2</sub>CO<sub>3</sub> (14.3 mmol), was evacuated and backfilled with nitrogen (this process was

repeated three times). Indoline (10.0 mmol), 1-bromo-4-methylbenzene (7.1 mmol), and DMF (15 mL) were added, and the reaction mixture was stirred at room temperature for 0.5 h, then heated at 120 °C. After 40 h, the reaction mixture was cooled to room temperature, diluted with ethyl acetate, filtered through a plug of silica gel, and washed with EtOAc. The filtrate was concentrated on a rotary evaporator, and the resulting residue was purified by column chromatography on silica gel (EtOAc/Hx=1:10) to provide the desired indoline **4aa**.

### Synthesis of **4ab**

Indolines **4ab** was prepared by the known procedure.<sup>6</sup>

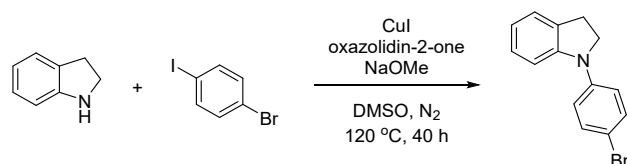

A 50 mL flame-dried round-bottom flask, which was equipped with a magnetic stirring bar and charged with CuI (0.5 mmol), oxazolidin-2-one (1.0 mmol), and NaOMe (15 mmol), was evacuated, and backfilled with nitrogen (this process was repeated three times). DMSO (20 mL) was added, and the reaction mixture was stirred at room temperature for 0.5 h. Then, indoline (10 mmol) and 1-bromo-4-iodobenzene (15 mmol) were added. After the reaction mixture was stirred at 120 °C for 40 h, the reaction mixture was quenched with saturated aqueous NH<sub>4</sub>Cl solution and extracted with EtOAc. The combined organic layers were dried over MgSO<sub>4</sub>, filtered, and concentrated on a rotary evaporator. The residue was purified by column chromatography on silica gel (EtOAc/Hx=1:10) to give a desired indoline **4ab**.

### Synthesis of **4ac**

Indolines **4ac** was prepared by the known procedure.<sup>7</sup>

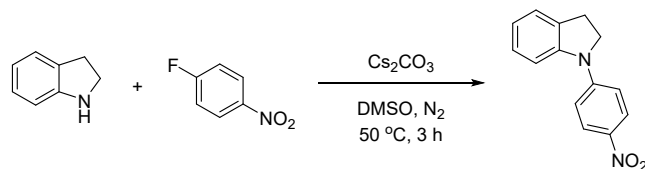

A 50 mL flame-dried round-bottom flask, which was equipped with a magnetic stir bar and charged with Cs<sub>2</sub>CO<sub>3</sub> (20 mmol), was evacuated and backfilled with nitrogen (this process was repeated three times). After DMSO (12 mL), indoline (10.0 mmol), and 1-fluoro-4-nitrobenzene (8.8 mmol) were added, the reaction mixture was stirred at 50 °C for 3 h. Then, cold water was added, and the reaction mixture was extracted with EtOAc. The combined organic layers were washed with water and brine, dried over MgSO<sub>4</sub>, filtered, and concentrated on a rotary evaporator. The crude product was purified by flash column chromatography on silica (EtOAc/Hx=1:10) to give indoline **4ac**.

### 3. Characterizations of newly synthesized indolines

The characterizations of newly synthesized indolines were provided below.

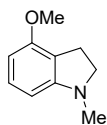

**4-methoxy-1-methylindoline (4i):** yellow oil, EtOAc/Hx=1:10,  $^1\text{H}$  NMR (300 MHz,  $\text{CDCl}_3$ )  $\delta$  7.08 – 7.02 (m, 1H), 6.28 (dd,  $J = 8.3, 2.4$  Hz, 1H), 6.18 (dd,  $J = 7.9, 2.5$  Hz, 1H), 3.79 (s, 3H), 3.29 (t,  $J = 7.2$  Hz, 2H), 2.90 (t,  $J = 6.9$ , 2H), 2.73 (s, 3H);  $^{13}\text{C}$  NMR (75 MHz,  $\text{CDCl}_3$ )  $\delta$  156.0, 155.1, 128.7, 116.2, 101.3, 101.2, 56.3, 55.2, 36.4, 25.7; HRMS (EI)  $m/z$  calcd. For  $\text{C}_{10}\text{H}_{13}\text{NO}$   $[\text{M}]^+$ : 163.0997, found 163.0995.

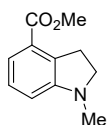

**methyl 1-methylindoline-4-carboxylate (4l):** yellow oil, EtOAc/Hx=1:60,  $^1\text{H}$  NMR (400 MHz,  $\text{CDCl}_3$ )  $\delta$  7.29 (dd,  $J = 7.8, 1.0$  Hz, 1H), 7.12 (t,  $J = 7.8$  Hz, 1H), 6.58 (dd,  $J = 7.8, 1.0$  Hz, 1H), 3.87 (s, 3H), 3.37 – 3.33 (m, 2H), 3.32 – 3.27 (m, 2H), 2.76 (s, 3H);  $^{13}\text{C}$  NMR (101 MHz,  $\text{CDCl}_3$ )  $\delta$  167.5, 154.0, 133.4, 127.5, 126.2, 118.8, 110.5, 55.7, 51.7, 36.0, 29.8; HRMS (EI)  $m/z$  calcd. For  $\text{C}_{11}\text{H}_{13}\text{NO}$   $[\text{M}]^+$ : 191.0946, found 191.0947.

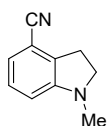

**1-methylindoline-4-carbonitrile (4m):** yellow oil, EtOAc/PE=1:5,  $^1\text{H}$  NMR (300 MHz,  $\text{CDCl}_3$ )  $\delta$  5.71 – 5.65 (m, 1H), 5.42 (dd,  $J = 7.8, 0.9$  Hz, 1H), 5.13 (dd,  $J = 8.0, 0.8$  Hz, 1H), 1.99 (t,  $J = 8.2$  Hz, 2H), 1.70 (t,  $J = 8.3$  Hz, 2H), 1.35 (s, 3H).;  $^{13}\text{C}$  NMR (75 MHz,  $\text{CDCl}_3$ )  $\delta$  153.6, 134.8, 128.4, 119.7, 118.0, 110.1, 108.3, 55.3, 35.4, 28.2; HRMS (EI)  $m/z$  calcd. For  $\text{C}_{10}\text{H}_{10}\text{N}_2$   $[\text{M}]^+$ : 158.0844, found 158.0842.

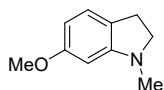

**6-methoxy-1-methylindoline (4n):** yellow oil, EtOAc/Hx=1:40,  $^1\text{H}$  NMR (400 MHz,  $\text{CDCl}_3$ )  $\delta$  6.96 – 6.93 (m, 1H), 6.19 (dd,  $J = 8.0, 2.3$  Hz, 1H), 6.08 (s, 1H), 3.76 (s, 3H), 3.29 (t,  $J = 8.1$  Hz, 2H), 2.86 (t,  $J = 7.9$  Hz, 2H), 2.72 (s, 3H);  $^{13}\text{C}$  NMR (101 MHz,  $\text{CDCl}_3$ )  $\delta$  160.1, 154.6, 124.2, 122.7, 101.8, 95.0, 56.7, 55.3, 36.0, 27.9. HRMS (EI)  $m/z$  calcd. For  $\text{C}_{10}\text{H}_{13}\text{NO}$   $[\text{M}]^+$ : 163.0997, found 163.0996.

#### 4. Optimization of aerobic oxidative dehydrogenation of tertiary indolines

A 10 mL flame-dried test tube, which was equipped with a magnetic stir bar and charged with catalyst (0.1 equiv., 0.05 mmol), additives (0.2 equiv., 0.10 mmol), and **1** (0.2 equiv., 0.10 mmol), was evacuated and backfilled with oxygen (this process was repeated three times). After 0.3 mL of solvent was added, 5-chloro-1-methylindoline **4a** (0.5 mmol) and 0.7 mL of the solvent were added in sequence. The reaction mixture was stirred at 40 °C for 18 h. The reaction was quenched with saturated aqueous NH<sub>4</sub>Cl solution, washed with water, and extracted with EtOAc. The combined organic layers were dried over MgSO<sub>4</sub>, filtered, and concentrated on a rotary evaporator. The residue was purified by column chromatography on silica gel (EtOAc/Hx=1:10) to give the desired indole **5a**.

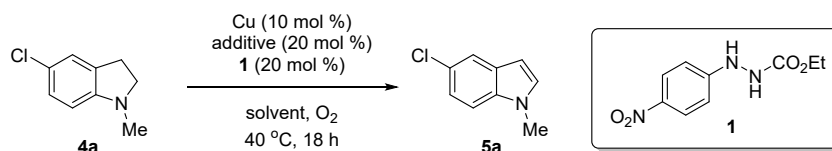

| Entry           | Cu                                                  | Additive        | Solvent                 | Yield (%) <sup>a</sup> |
|-----------------|-----------------------------------------------------|-----------------|-------------------------|------------------------|
| 1               | Cu(acac) <sub>2</sub>                               | DMAP            | CH <sub>3</sub> CN      | 24                     |
| 2               | Cu(OAc) <sub>2</sub>                                | DMAP            | CH <sub>3</sub> CN      | 37                     |
| 3               | Cu(OH) <sub>2</sub>                                 | DMAP            | CH <sub>3</sub> CN      | 30                     |
| 4               | Cu(NO <sub>3</sub> ) <sub>2</sub>                   | DMAP            | CH <sub>3</sub> CN      | 74                     |
| 5               | Cu(OTf) <sub>2</sub>                                | DMAP            | CH <sub>3</sub> CN      | 74                     |
| 8               | Cu(CH <sub>3</sub> CN) <sub>4</sub> PF <sub>6</sub> | DMAP            | CH <sub>3</sub> CN      | 67                     |
| 9               | CuBr <sub>2</sub>                                   | DMAP            | CH <sub>3</sub> CN      | 55                     |
| 10              | CuBr                                                | DMAP            | CH <sub>3</sub> CN      | 70                     |
| 11              | CuI                                                 | DMAP            | CH <sub>3</sub> CN      | 60                     |
| <b>12</b>       | <b>CuCl</b>                                         | <b>DMAP</b>     | <b>CH<sub>3</sub>CN</b> | <b>82</b>              |
| 13              | CuCl                                                | pyridine        | CH <sub>3</sub> CN      | 20                     |
| 14              | CuCl                                                | 2,2'-bipyridine | CH <sub>3</sub> CN      | 19                     |
| 15              | CuCl                                                | DMAP            | THF                     | 7                      |
| 16              | CuCl                                                | DMAP            | DMSO                    | 41                     |
| 17              | CuCl                                                | DMAP            | toluene                 | 15                     |
| 18              | -                                                   | DMAP            | CH <sub>3</sub> CN      | -                      |
| 19              | CuCl                                                | -               | CH <sub>3</sub> CN      | 14                     |
| 20 <sup>b</sup> | CuCl                                                | DMAP            | CH <sub>3</sub> CN      | 9                      |
| 21 <sup>c</sup> | CuCl                                                | DMAP            | CH <sub>3</sub> CN      | 5                      |
| 22 <sup>d</sup> | CuCl                                                | DMAP            | CH <sub>3</sub> CN      | 27                     |

<sup>a</sup> Isolated yields. <sup>b</sup> No **1** was used. <sup>c</sup> Under N<sub>2</sub>. <sup>d</sup> At room temperature

#### 5. General procedure for Cu-catalyzed dehydrogenation of tertiary indolines

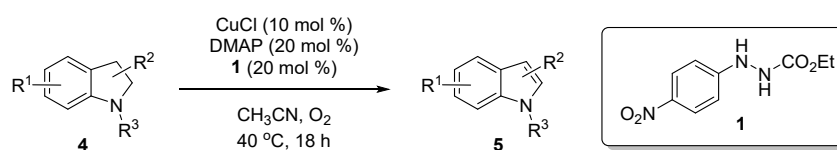

A 10 mL flame-dried test tube, which was equipped with a magnetic stir bar and charged with CuCl (0.1 equiv., 0.05 mmol), DMAP (0.2 equiv., 0.10 mmol), and **1** (0.2 equiv., 0.10 mmol), was evacuated and backfilled with oxygen (this process was repeated three times). After 0.3 mL of acetonitrile was

added, indolines **4** (0.5 mmol) and 0.7 mL of acetonitrile were added in sequence. The reaction mixture was stirred at 40 °C for 18 h. The reaction was quenched with saturated aqueous NH<sub>4</sub>Cl solution, washed with water, and extracted with EtOAc. The combined organic layers were dried over MgSO<sub>4</sub>, filtered, and concentrated on a rotary evaporator. The residue was purified by column chromatography on silica gel to give the desired indole **5**.

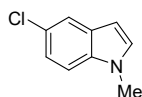

**5-chloro-1-methyl-1H-indole**<sup>8</sup> (**5a**); light yellow liquid, EtOAc/Hx=1:10, <sup>1</sup>H NMR (400 MHz, CDCl<sub>3</sub>) δ 7.58 (d, *J* = 1.9 Hz, 1H), 7.22 (d, *J* = 8.7 Hz, 1H), 7.16 (dd, *J* = 8.7, 1.9 Hz, 1H), 7.06 (d, *J* = 3.0 Hz, 1H), 6.41 (d, *J* = 3.0 Hz, 1H), 3.77 (s, 3H); <sup>13</sup>C NMR (101 MHz, CDCl<sub>3</sub>) δ 135.1, 130.1, 129.5, 125.1, 121.8, 120.2, 110.2, 100.6, 33.0.

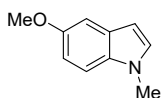

**5-methoxy-1-methyl-1H-indole**<sup>8</sup> (**5b**); brown solid, EtOAc/Hx=1:5, <sup>1</sup>H NMR (400 MHz, CDCl<sub>3</sub>) δ 7.21 (d, *J* = 8.8 Hz, 1H), 7.09 (d, *J* = 2.1 Hz, 1H), 7.01 (d, *J* = 2.9 Hz, 1H), 6.88 (dd, *J* = 8.8, 2.2 Hz, 1H), 6.39 (d, *J* = 2.7 Hz, 1H), 3.85 (s, 3H), 3.75 (s, 3H); <sup>13</sup>C NMR (101 MHz, CDCl<sub>3</sub>) δ 154.0, 132.1, 129.3, 128.8, 111.9, 109.9, 102.5, 100.4, 55.9, 33.0.

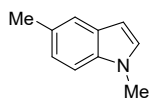

**1,5-dimethyl-1H-indole**<sup>1</sup> (**5c**); yellow liquid, EtOAc/Hx=1:10, <sup>1</sup>H NMR (400 MHz, CDCl<sub>3</sub>) δ 7.40 (s, 1H), 7.20 (d, *J* = 8.3 Hz, 1H), 7.04 (d, *J* = 8.3 Hz, 1H), 6.99 (d, *J* = 2.4 Hz, 1H), 6.38 (d, *J* = 2.8 Hz, 1H), 3.74 (s, 3H), 2.44 (s, 3H). <sup>13</sup>C NMR (101 MHz, CDCl<sub>3</sub>) δ 135.2, 128.8, 128.7, 128.4, 123.1, 120.5, 108.9, 100.3, 32.8, 21.4.

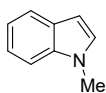

**1-methyl-1H-indole**<sup>8</sup> (**5d**); light yellow liquid, EtOAc/Hx=1:10, <sup>1</sup>H NMR (400 MHz, CDCl<sub>3</sub>) δ 7.63 (d, *J* = 7.9 Hz, 1H), 7.32 (d, *J* = 8.2 Hz, 1H), 7.24 – 7.20 (m, 1H), 7.14 – 7.07 (m, 1H), 7.04 (d, *J* = 3.1 Hz, 1H), 6.48 (d, *J* = 3.1 Hz, 1H), 3.77 (s, 3H); <sup>13</sup>C NMR (101 MHz, CDCl<sub>3</sub>) δ 136.7, 128.8, 128.5, 121.5, 120.9, 119.3, 109.2, 100.9, 32.8.

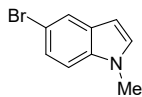

**5-bromo-1-methyl-1H-indole<sup>1</sup> (5e)**; light yellow solid, EtOAc/Hx=1:10, <sup>1</sup>H NMR (400 MHz, CDCl<sub>3</sub>) δ 7.73 (d, *J* = 1.6, 1H), 7.28 (dd, *J* = 8.7, 1.6 Hz, 1H), 7.16 (d, *J* = 8.7 Hz, 1H), 7.03 (d, *J* = 3.0 Hz, 1H), 6.40 (d, *J* = 2.6 Hz, 1H), 3.75 (s, 3H); <sup>13</sup>C NMR (101 MHz, CDCl<sub>3</sub>) δ 135.4, 130.1, 130.0, 124.3, 123.3, 112.6, 110.7, 100.5, 33.0.

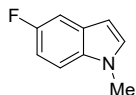

**5-fluoro-1-methyl-1H-indole<sup>8</sup> (5f)**; yellow solid, EtOAc/Hx=1:40, <sup>1</sup>H NMR (300 MHz, CDCl<sub>3</sub>) δ 7.25 (dd, *J* = 9.7, 2.5 Hz, 1H), 7.17 (dd, *J* = 8.9, 4.3 Hz, 1H), 7.03 (d, *J* = 3.1 Hz, 1H), 6.94 (td, *J* = 9.1, 2.5 Hz, 1H), 6.41 (dd, *J* = 3.0, 0.9 Hz, 1H), 3.71 (s, 3H); <sup>13</sup>C NMR (75 MHz, CDCl<sub>3</sub>) δ 157.9 (d, *J* = 232.5 Hz), 133.4, 130.4, 128.7 (d, *J* = 10.3 Hz), 109.9 (d, *J* = 15 Hz), 109.7, 105.6 (d, *J* = 23.2 Hz), 100.9 (d, *J* = 4.7 Hz), 33.0; <sup>19</sup>F NMR (282 MHz, CDCl<sub>3</sub>) δ -127.6.

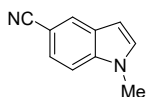

**1-methyl-1H-indole-5-carbonitrile<sup>9</sup> (5g)**; white solid, EtOAc/Hx=1:10, <sup>1</sup>H NMR (400 MHz, CDCl<sub>3</sub>) δ 7.96 (s, 1H), 7.44 (dt, *J* = 8.4, 1.2 Hz, 1H), 7.36 (d, *J* = 8.4, Hz 1H), 7.17 (d, *J* = 3.2 Hz, 1H), 6.57 (d, *J* = 3.2, Hz, 1H), 3.83 (s, 3H); <sup>13</sup>C NMR (101 MHz, CDCl<sub>3</sub>) δ 138.2, 131.1, 128.2, 126.5, 124.5, 120.9, 110.1, 102.4, 102.2, 33.1.

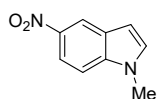

**1-methyl-5-nitro-1H-indole<sup>8</sup> (5h)**; brown solid, MC/Hx=1:2, <sup>1</sup>H NMR (300 MHz, CDCl<sub>3</sub>) δ 8.58 (d, *J* = 2.3 Hz, 1H), 8.12 (dd, *J* = 9.1, 2.2 Hz, 1H), 7.33 (d, *J* = 9.1 Hz, 1H), 7.21 (d, *J* = 3.3 Hz, 1H), 6.67 (d, *J* = 3.3 Hz, 1H), 3.86 (s, 3H); <sup>13</sup>C NMR (75 MHz, CDCl<sub>3</sub>) δ 141.6, 139.4, 132.1, 127.6, 118.2, 117.2, 109.1, 103.9, 33.3.

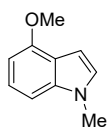

**4-methoxy-1-methyl-1H-indole<sup>1</sup> (5i)**; colorless solid, EtOAc/Hx=1:60, <sup>1</sup>H NMR (300 MHz, CDCl<sub>3</sub>) δ 7.12 (t, *J* = 8.0 Hz, 1H), 6.90 (dd, *J* = 6.0, 2.9 Hz, 2H), 6.57 (dd, *J* = 3.1, 0.9 Hz, 1H), 6.49 (d, *J* = 8.4,



1H), 3.91 (s, 3H), 3.67 (s, 3H); <sup>13</sup>C NMR (75 MHz, CDCl<sub>3</sub>) δ 153.4, 138.2, 127.3, 122.3, 119.0, 102.7, 99.2, 98.2, 55.3, 33.0.

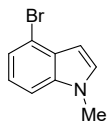

**4-bromo-1-methyl-1H-indole<sup>8</sup> (5j)**; light yellow oil, EtOAc/PE=1:20, <sup>1</sup>H NMR (300 MHz, CDCl<sub>3</sub>) δ 7.27 – 7.19 (m, 2H), 7.06 – 7.01 (m, 2H), 6.50 (d, *J* = 3.1, Hz, 1H), 3.70 (s, 3H); <sup>13</sup>C NMR (75 MHz, CDCl<sub>3</sub>) δ 137.0, 129.4, 129.1, 122.3, 122.2, 114.8, 108.4, 101.2, 33.1.

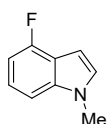

**4-fluoro-1-methyl-1H-indole<sup>8</sup> (5k)**; yellow oil, EtOAc/Hx=1:40, <sup>1</sup>H NMR (300 MHz, CDCl<sub>3</sub>) δ 7.08 – 6.94 (m, 2H), 6.85 (d, *J* = 3.2 Hz, 1H), 6.77 – 6.71 (m, 1H), 6.51 (d, *J* = 3.2, Hz, 1H), 3.56 (s, 3H); <sup>13</sup>C NMR (75 MHz, CDCl<sub>3</sub>) δ 156.4 (d, *J* = 244.9 Hz), 139.4 (d, *J* = 11.6 Hz), 128.7, 121.9 (d, *J* = 7.7 Hz), 117.4 (d, *J* = 22.2 Hz), 105.4 (d, *J* = 3.5 Hz), 104.0 (d, *J* = 19.0 Hz), 96.9, 32.8; <sup>19</sup>F NMR (282 MHz, CDCl<sub>3</sub>) δ -124.0.

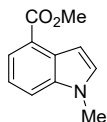

**methyl 1-methyl-1H-indole-4-carboxylate<sup>8</sup> (5l)**; yellow oil, MC/Hx=1:2, <sup>1</sup>H NMR (400 MHz, CDCl<sub>3</sub>) δ 7.91 (d, *J* = 7.5 Hz, 1H), 7.51 (d, *J* = 8.2 Hz, 1H), 7.27 – 7.23 (m, 1H), 7.17 (d, *J* = 3.1 Hz, 1H), 7.10 (d, *J* = 3.1 Hz, 1H), 3.97 (s, 3H), 3.81 (s, 3H); <sup>13</sup>C NMR (101 MHz, CDCl<sub>3</sub>) δ 168.1, 137.5, 130.9, 128.0, 123.0, 121.5, 120.6, 114.0, 102.2, 51.7, 33.0.

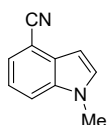

**1-methyl-1H-indole-4-carbonitrile<sup>9</sup> (5m)**; white solid, EtOAc/PE=1:5, <sup>1</sup>H NMR (300 MHz, CDCl<sub>3</sub>) δ 7.52 (d, *J* = 8.3 Hz, 1H), 7.44 (dd, *J* = 7.4, 0.8 Hz, 1H), 7.25 – 7.20 (m, 2H), 6.66 (dd, *J* = 3.1, 0.7 Hz, 1H), 3.82 (s, 3H); <sup>13</sup>C NMR (75 MHz, CDCl<sub>3</sub>) δ 136.3, 131.5, 129.6, 124.7, 121.0, 118.8, 114.0, 102.9, 100.0, 33.0.

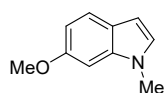

**6-methoxy-1-methyl-1*H*-indole<sup>4</sup> (5n)**; orange oil, EtOAc/Hx=1:40, <sup>1</sup>H NMR (400 MHz, CDCl<sub>3</sub>) δ 7.61 – 7.56 (m, 1H), 7.01 (d, *J* = 3.2 Hz, 1H), 6.89 – 6.85 (m, 2H), 6.51 – 6.48 (m, 1H), 3.96 (s, 3H), 3.79 (s, 3H); <sup>13</sup>C NMR (101 MHz, CDCl<sub>3</sub>) δ 156.1, 137.3, 127.7, 122.6, 121.3, 109.2, 100.7, 92.6, 55.6, 32.6.

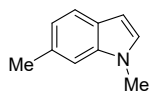

**1,6-dimethyl-1*H*-indole<sup>8</sup> (5o)**; yellow oil, EtOAc/Hx=1:40, <sup>1</sup>H NMR (300 MHz, CDCl<sub>3</sub>) δ 7.49 (d, *J* = 8.0 Hz, 1H), 7.10 (s, 1H), 6.94 – 6.92 (m, 2H), 6.41 (d, *J* = 3.0 Hz, 1H), 3.71 (s, 3H), 2.49 (s, 3H); <sup>13</sup>C NMR (75 MHz, CDCl<sub>3</sub>) δ 137.1, 131.3, 128.2, 126.3, 121.1, 120.5, 109.2, 100.7, 32.7, 21.9.

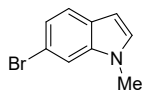

**6-bromo-1-methyl-1*H*-indole<sup>9</sup> (5p)**; yellow oil, EtOAc/Hx=1:7, <sup>1</sup>H NMR (400 MHz, CDCl<sub>3</sub>) δ 7.47 – 7.45 (m, 2H), 7.19 (dd, *J* = 8.5, 1.7 Hz, 1H), 7.00 (d, *J* = 3.1 Hz, 1H), 6.44 (dd, *J* = 3.1, 0.9 Hz, 1H), 3.73 (s, 3H); <sup>13</sup>C NMR (101 MHz, CDCl<sub>3</sub>) δ 137.6, 129.5, 127.3, 122.5, 122.1, 115.2, 112.3, 101.2, 32.9.

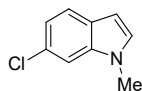

**6-chloro-1-methyl-1*H*-indole<sup>1</sup> (5q)**; yellow oil, EtOAc/Hx=1:60, <sup>1</sup>H NMR (300 MHz, CDCl<sub>3</sub>) δ 7.49 (d, *J* = 8.4 Hz, 1H), 7.29 – 7.27 (m, 1H), 7.05 (dd, *J* = 8.4, 1.8 Hz, 1H), 6.98 (d, *J* = 3.1 Hz, 1H), 6.43 (dd, *J* = 3.1, 0.8 Hz, 1H), 3.68 (s, 3H); <sup>13</sup>C NMR (75 MHz, CDCl<sub>3</sub>) δ 137.1, 129.5, 127.5, 127.0, 121.7, 119.9, 109.2, 101.1, 32.8.

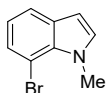

**7-bromo-1-methyl-1*H*-indole<sup>9</sup> (5r)**; yellow oil, MC/Hx=1:5, <sup>1</sup>H NMR (400 MHz, CDCl<sub>3</sub>) δ 7.54 (dd, *J* = 7.9, 0.8 Hz, 1H), 7.34 (dd, *J* = 7.5, 1.3 Hz, 1H), 7.00 (d, *J* = 3.2, 1H), 6.91 (t, *J* = 7.7 Hz, 1H), 6.46 (d, *J* = 3.3, Hz, 1H), 4.16 (s, 3H); <sup>13</sup>C NMR (101 MHz, CDCl<sub>3</sub>) δ 133.04, 131.8, 131.7, 126.5, 120.5, 120.4, 103.9, 101.2, 36.9.

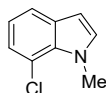

**7-chloro-1-methyl-1*H*-indole (5s)**; yellow oil, EtOAc/Hx=1:10, <sup>1</sup>H NMR (400 MHz, CDCl<sub>3</sub>) δ 7.47 (dd, *J* = 7.9, 1.0 Hz, 1H), 7.12 (dd, *J* = 7.6, 0.8 Hz, 1H), 6.98 – 6.93 (m, 2H), 6.45 (d, *J* = 3.1 Hz, 1H), 4.12 (s, 3H); <sup>13</sup>C NMR (101 MHz, CDCl<sub>3</sub>) δ 132.0, 131.7, 131.5, 123.0, 120.1, 119.7, 117.0, 101.3, 36.8. HRMS (EI) *m/z* calcd. For C<sub>9</sub>H<sub>8</sub>NCl [M]<sup>+</sup>: 165.0345, found 165.0343.

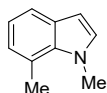

**1,7-dimethyl-1*H*-indole<sup>1</sup> (5t)**; colorless solid, MC/Hx=1:7, <sup>1</sup>H NMR (300 MHz, CDCl<sub>3</sub>) δ 7.49 (d, *J* = 7.8 Hz, 1H), 7.03 – 6.93 (m, 3H), 6.47 (d, *J* = 3.1 Hz, 1H), 4.10 (s, 3H), 2.81 (s, 3H); <sup>13</sup>C NMR (75 MHz, CDCl<sub>3</sub>) δ 135.4, 130.4, 129.6, 124.1, 121.2, 119.6, 119.1, 100.9, 36.8, 19.7.

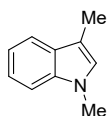

**1,3-dimethyl-1*H*-indole<sup>8</sup> (5u)**; light yellow liquid, MC/Hx=1:2, <sup>1</sup>H NMR (400 MHz, CDCl<sub>3</sub>) δ 7.56 (d, *J* = 7.8 Hz, 1H), 7.26 (d, *J* = 8.0 Hz, 1H), 7.21 (t, *J* = 7.5 Hz, 1H), 7.10 (t, *J* = 7.2 Hz, 1H), 6.80 (s, 1H), 3.70 (s, 3H), 2.32 (s, 3H); <sup>13</sup>C NMR (101 MHz, CDCl<sub>3</sub>) δ 137.0, 128.7, 126.5, 121.4, 119.0, 118.5, 110.1, 109.0, 32.5, 9.6.

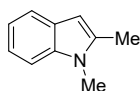

**1,2-dimethyl-1*H*-indole<sup>8</sup> (5v)**; yellow solid, EtOAc/Hx=1:2, <sup>1</sup>H NMR (400 MHz, CDCl<sub>3</sub>) δ 7.51 (d, *J* = 7.6 Hz, 1H), 7.23 (t, *J* = 8.8 Hz, 1H), 7.14 (t, *J* = 7.1 Hz, 1H), 7.05 (t, *J* = 6.9 Hz, 1H), 6.23 (s, 1H), 3.63 (s, 3H), 2.40 (s, 3H); <sup>13</sup>C NMR (101 MHz, CDCl<sub>3</sub>) δ 137.3, 136.8, 127.9, 120.4, 119.6, 119.2, 108.7, 99.5, 29.4, 12.8.

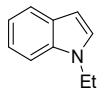

**1-ethyl-1*H*-indole<sup>10</sup> (5w)**; colorless liquid, EtOAc/Hx=1:10, <sup>1</sup>H NMR (400 MHz, CDCl<sub>3</sub>) δ 7.62 (d, *J* = 7.8 Hz, 1H), 7.33 (d, *J* = 8.1 Hz, 1H), 7.19 (t, *J* = 7.4 Hz, 1H), 7.10 (d, *J* = 8.0 Hz, 2H), 6.48 (d, *J* = 3.6 Hz, 1H), 4.12 (q, *J* = 6.9 Hz, 2H), 1.42 (t, *J* = 7.1 Hz, 3H); <sup>13</sup>C NMR (101 MHz, CDCl<sub>3</sub>) δ 135.7, 128.6, 127.0, 121.3, 121.0, 119.2, 109.3, 101.0, 40.9, 15.5.

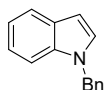

**1-benzyl-1H-indole<sup>10</sup> (5x)**; white solid, MC/Hx=1:4, <sup>1</sup>H NMR (400 MHz, CDCl<sub>3</sub>) δ 7.65 (d, *J* = 7.8 Hz, 1H), 7.30 – 7.21 (m, 4H), 7.16 (td, *J* = 7.5, 0.8 Hz, 1H), 7.14 – 1.09 (m, 4H), 6.55 (d, *J* = 3.0 Hz, 1H), 5.30 (s, 2H); <sup>13</sup>C NMR (101 MHz, CDCl<sub>3</sub>) δ 137.6, 136.3, 129.6, 128.8, 128.3, 127.6, 126.8, 121.7, 121.0, 119.6, 109.7, 101.7, 50.1.

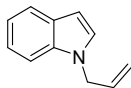

**1-allyl-1H-indole<sup>10</sup> (5y)**; colorless oil, MC/Hx=1:7, <sup>1</sup>H NMR (300 MHz, CDCl<sub>3</sub>) δ 7.63 (d, *J* = 7.6 Hz, 1H), 7.30 (d, *J* = 8.1 Hz, 1H), 7.21 – 7.16 (m, 1H), 7.12 – 7.06 (m, 2H), 6.50 (dd, *J* = 3.1, 0.7 Hz, 1H), 6.01 – 5.90 (m, 1H), 5.18 – 5.14 (m, 1H), 5.09 – 5.02 (m, 1H), 4.70 – 4.67 (m, 2H); <sup>13</sup>C NMR (75 MHz, CDCl<sub>3</sub>) δ 136.1, 133.5, 128.7, 127.8, 121.5, 121.0, 119.4, 117.2, 109.6, 101.4, 48.8.

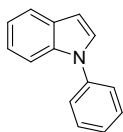

**1-phenyl-1H-indole<sup>10</sup> (5z)**; white solid, PE/Hx=1:1, <sup>1</sup>H NMR (300 MHz, CDCl<sub>3</sub>) δ 7.68 (d, *J* = 6.8, 1.9 Hz, 1H), 7.55 (d, *J* = 7.6, 1H), 7.47 – 7.45 (m, 4H), 7.33 – 7.20 (m, 2H), 7.19 – 7.15 (m, 2H), 6.67 (q, *J* = 3.0, 0.8 Hz, 1H); <sup>13</sup>C NMR (75 MHz, CDCl<sub>3</sub>) δ 139.8, 135.8, 129.6, 129.3, 127.9, 126.4, 124.3, 122.4, 121.1, 120.4, 110.5, 103.6.

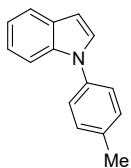

**1-(p-tolyl)-1H-indole<sup>11</sup> (5aa)**; yellow oil, EtOAc/Hx=1:10, <sup>1</sup>H NMR (300 MHz, CDCl<sub>3</sub>) δ 7.67 (dd, *J* = 7.6, 1.3 Hz, 1H), 7.54 – 7.49 (m, 1H), 7.36 (d, *J* = 8.4 Hz, 2H), 7.30 – 7.25 (m, 3H), 7.22 – 7.11 (m, 2H), 6.65 (d, *J* = 3.2 Hz, 1H), 2.40 (s, 3H); <sup>13</sup>C NMR (101 MHz, CDCl<sub>3</sub>) δ 137.3, 136.3, 136.0, 130.1, 129.2, 128.1, 124.3, 122.2, 121.1, 120.2, 110.5, 103.2, 21.0.

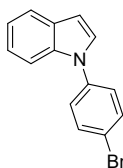

**1-(4-bromophenyl)-1H-indole<sup>12</sup> (5ab)**; yellow oil, EtOAc/Hx=1:10, <sup>1</sup>H NMR (400 MHz, CDCl<sub>3</sub>) δ 7.69 – 7.66 (m, 1H), 7.61 – 7.51 (m, 2H), 7.51 – 7.49 (m, 1H), 7.35 – 7.33 (m, 2H), 7.25 – 7.17 (m, 3H), 6.67 (d, *J* = 2.8 Hz, 1H); <sup>13</sup>C NMR (101 MHz, CDCl<sub>3</sub>) δ 138.8, 135.6, 132.7, 129.4, 127.6, 125.7, 122.6, 121.3, 120.6, 119.7, 110.3, 104.2.

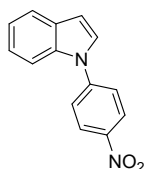

**1-(4-nitrophenyl)-1H-indole<sup>13</sup> (5ac)**; yellow solid, EtOAc/Hx=1:10, <sup>1</sup>H NMR (400 MHz, CDCl<sub>3</sub>) δ 8.37 (d, *J* = 9.0 Hz, 2H), 7.71 – 7.63 (m, 4H), 7.36 (d, *J* = 3.4 Hz, 1H), 7.31 – 7.21 (m, 2H), 6.76 (d, *J* = 3.4 Hz, 1H); <sup>13</sup>C NMR (101 MHz, CDCl<sub>3</sub>) δ 145.3, 145.0, 135.3, 130.1, 127.1, 125.5, 123.4, 123.3, 121.7, 121.6, 110.5, 106.2.

### 6. Scale-up process for 5-methoxy-1-methyl-1H-indole

A 250 mL round-bottle flask, which was equipped with a magnetic stir bar and charged with CuCl (0.1 equiv., 0.7 mmol), DMAP (0.2 equiv., 1.4 mmol), and **1** (0.2 equiv., 1.4 mmol), was evacuated and backfilled with oxygen (this process was repeated three times). After 4.0 mL of acetonitrile was added, 5-methoxy-1-methylindoline **4b** (7.0 mmol) and 10 mL of acetonitrile were added in sequence. The reaction mixture was stirred at 40 °C for 18 h. The reaction was quenched with saturated aqueous NH<sub>4</sub>Cl solution, washed with water, and extracted with EtOAc. The combined organic layers were dried over MgSO<sub>4</sub>, filtered, and concentrated on a rotary evaporator. The residue was purified by column chromatography on silica gel (EtOAc/Hx=1:5) to give the desired indole **5b**.

### 7. Synthesis of indolines 4af and 4ag for the synthesis of biologically active compounds

#### Synthesis of 4af

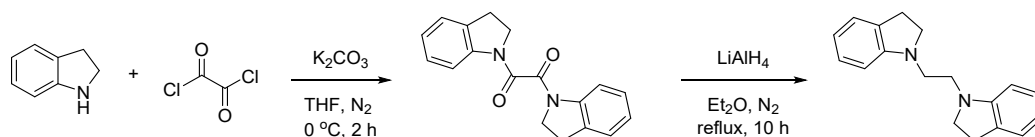

Indoline **4af** was prepared by the known procedure.<sup>14</sup>

#### Synthesis of 4ag

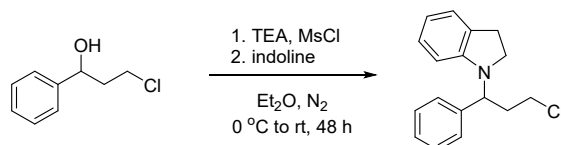

Indoline **4ag** was prepared by the known procedure.<sup>15</sup>

### 8. Characterizations of 5af and 5ag

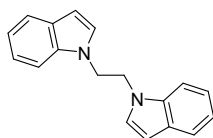

**1,2-di(1*H*-indol-1-yl)ethane<sup>14</sup> (5af)**; colorless oil, EtOAc/Hx=1:10, <sup>1</sup>H NMR (400 MHz, CDCl<sub>3</sub>) δ 7.61 (d, *J* = 7.7 Hz, 2H), 7.17 – 7.15 (m, 4H), 7.10 (t, *J* = 6.5 Hz, 2H), 6.50 (d, *J* = 3.2 Hz, 2H), 6.35 (d, *J* = 3.2 Hz, 2H), 4.34 (s, 4H); <sup>13</sup>C NMR (101 MHz, CDCl<sub>3</sub>) δ 135.5, 128.8, 128.0, 121.7, 121.2, 119.7, 108.7, 101.8, 46.1.

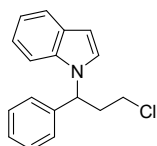

**1-(3-chloro-1-phenylpropyl)-1*H*-indole<sup>15</sup> (5ag)**; colorless liquid, EtOAc/Hx=1:10, <sup>1</sup>H NMR (400 MHz, CDCl<sub>3</sub>) δ 7.62 (d, *J* = 7.7 Hz, 1H), 7.35 – 7.07 (m, 9H), 6.57 (d, *J* = 3.2 Hz, 1H), 5.81 (dd, *J* = 9.3, 5.9 Hz, 1H), 3.48 (dt, *J* = 11.2, 5.6 Hz, 1H), 3.37 – 3.30 (m, 1H), 2.80 – 2.73 (m, 1H), 2.70 – 2.63 (m, 1H); <sup>13</sup>C NMR (101 MHz, CDCl<sub>3</sub>) δ 140.1, 136.3, 128.9, 128.7, 127.9, 126.4, 124.9, 121.8, 121.0, 119.8, 110.0, 102.5, 56.3, 41.5, 37.5.

## 9. References

- (1) Greulich, T. W.; Daniliuc, C. G.; Studer, A. *N*-Aminopyridinium Salts as Precursors for N-Centered Radicals – Direct Amidation of Arenes and Heteroarenes. *Org. Lett.* **2015**, *17*, 254–257.
- (2) Liu, H.; Chen, J.-G.; Wang, C.; Liu, Z.-T.; Li, Y.; Liu, Z.-W.; Xiao, J.; Lu, J. Immobilization of Cyclometalated Iridium Complex onto Multiwalled Carbon Nanotubes for Dehydrogenation of Indolines in Aqueous Solution. *Ind. Eng. Chem. Res.* **2017**, *56*, 11413–11421.
- (3) Anderson, W. K.; Lai, G.; Boron Trifluoride-Diethyl Ether Complex Catalyzed Aromatic Amino-Claisen Rearrangements. *Synthesis* **1995**, 1287–1290.
- (4) Leclair, A.; Wang, Q.; Zhu, J. Two-Carbon Ring Expansion of Cyclobutanols to Cyclohexenones Enabled by Indole Radical Cation Intermediate: Development and Application to a Total Synthesis of Uleine. *ACS Catal.* **2022**, *12*, 1209–1215.
- (5) Zhu, L.; Guo, P.; Li, G.; Lan, J.; Xie, R.; You, J. Simple Copper Salt-Catalyzed *N*-Arylation of Nitrogen-Containing Heterocycles with Aryl and Heteroaryl Halides. *J. Org. Chem.* **2007**, *72*, 8535–8538.
- (6) Ma, H. C.; Jiang, X. Z. Oxazolidin-2-one-Promoted CuI-Catalyzed Amidation of Aryl Halides and Cyclization of *o*-Halobenzanilides. *Synlett* **2008**, *9*, 1335–1340.
- (7) Xu, H.; Lv, L.; Fan, L.; He, X. Ultrasound-Assisted *N*-Arylation of Indoles without any Catalyst. *Heterocycles*, **2008**, *76*, 249–256.

- (8) Chen, W.; Tang, H.; Wang, W.; Fu, Q.; Luo, J. Catalytic aerobic dehydrogenation of *N*-heterocycles by *N*-hydroxyphthalimide. *Adv. Synth. Catal.* **2020**, *362*, 3905–3911.
- (9) Zhuang, W.; Zhang, J.; Ma, C.; Wright, J. S.; Zhang, X.; Ni, S.-F.; Huang, Q. Scalable Electrochemical Aerobic Oxygenation of Indoles to Isatins without Electron Transfer Mediators by Merging with an Oxygen Reduction Reaction. *Org. Lett.* **2022**, *24*, 4229–4233.
- (10) Li, B.; Wendlandt, A. E.; Stahl, S. S. Replacement of Stoichiometric DDQ with a Low Potential *o*-Quinone Catalyst Enabling Aerobic Dehydrogenation of Tertiary Indolines in Pharmaceutical Intermediates. *Org. Lett.* **2019**, *21*, 1176–1181.
- (11) Hartwig, J. F.; Kawatsura, M.; Hauck, S. I.; Shaughnessy, K. H.; Alcazar-Roman, L. M. Room-Temperature Palladium-Catalyzed Amination of Aryl Bromides and Chlorides and Extended Scope of Aromatic C-N Bond Formation with a Commercial Ligand. *J. Org. Chem.* **1999**, *64*, 5575–5580.
- (12) Messaoud, M. Y. A.; Bentabed-Ababsa, G.; Hedidi, M.; Derdour, A.; Chevallier, F.; Halauko, Y. S.; Ivashkevich, O. A.; Matulis, V. E.; Picot, L.; Thiéry, V.; Roisnel, T.; Dorcet, V.; Mongin, F. Deprotonation of *N*-arylated pyrroles and indoles using a mixed lithium–zinc base and regioselectivity-computed CH acidity relationship. *Beilstein. J. Org. Chem.* **2015**, *11*, 1475–1485.
- (13) Vaidya, G. N.; Khan, A.; Verma, H.; Kumar, S.; Kumar, D. Structure Ligation Relationship of Amino Acids for the Amination Cross-Coupling Reactions. *J. Org. Chem.* **2019**, *84*, 3004–3010.
- (14) Zhang, Z.; Gu, J.; Ji, L.; Liu, X.; Zhang, T.; Lv, Y.; Liu, F.; Jia, Z.; Loh, T.-P. Triaryl Carbonium Ion-Pair-Mediated Cooperative Aerobic Dehydrogenation of *N*-Heterocycles. *ACS Catal.* **2022**, *12*, 14123–14129.
- (15) Mahaney, P. E.; Vu, A. T.; McComas, C. C.; Zhang, P.; Nogle, L. M.; Watts, W. L.; Sarkahian, A.; Leventhal, L.; Sullivan, N. R.; Uveges, A. J.; Trybulski, E. J. Synthesis and activity of a new class of dual acting norepinephrine and serotonin reuptake inhibitors: 3-(1*H*-indol-1-yl)-3-arylpropan-1-amines. *Bioorg. Med. Chem.* **2006**, *14*, 8455–8466.

# 10. <sup>1</sup>H, <sup>13</sup>C, and <sup>19</sup>F NMR spectra

## 4-methoxy-1-methylindoline (4i)

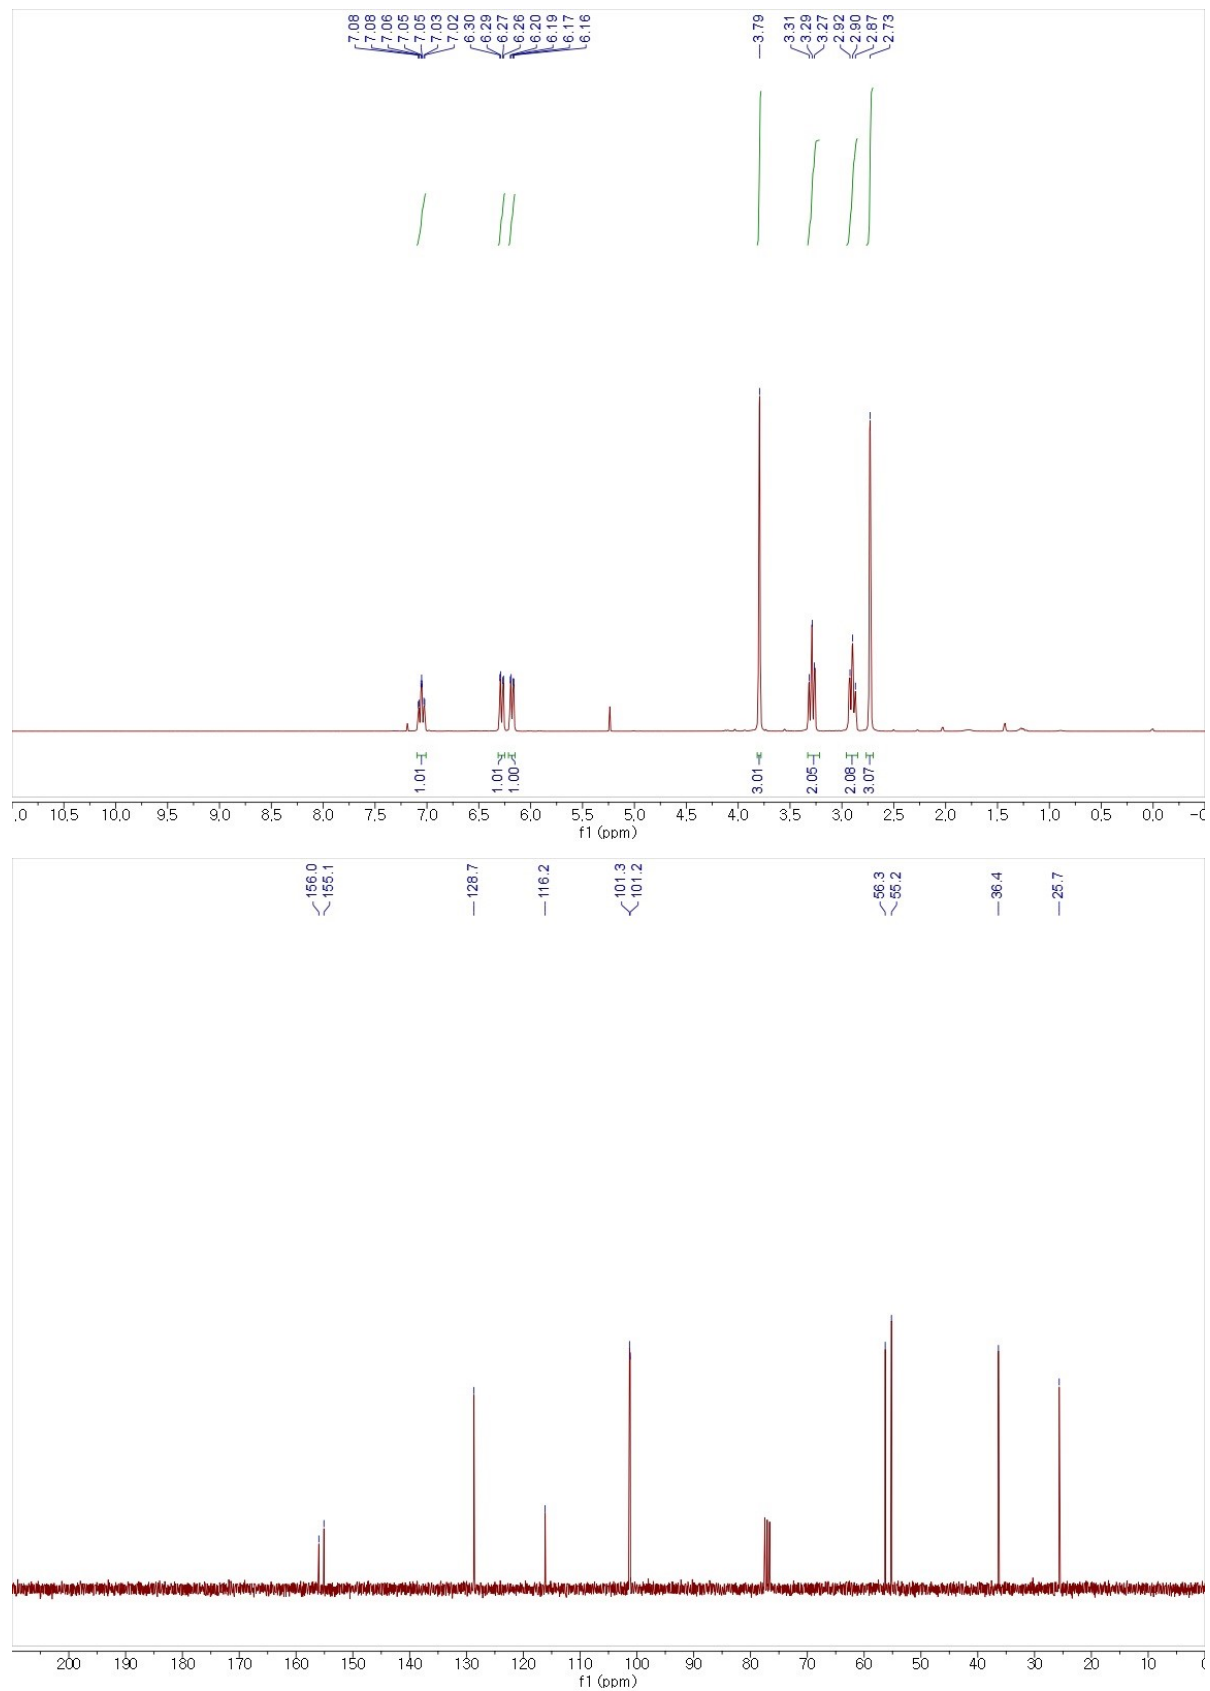



**methyl-1-methylindoline-4-carboxylate (4l)**

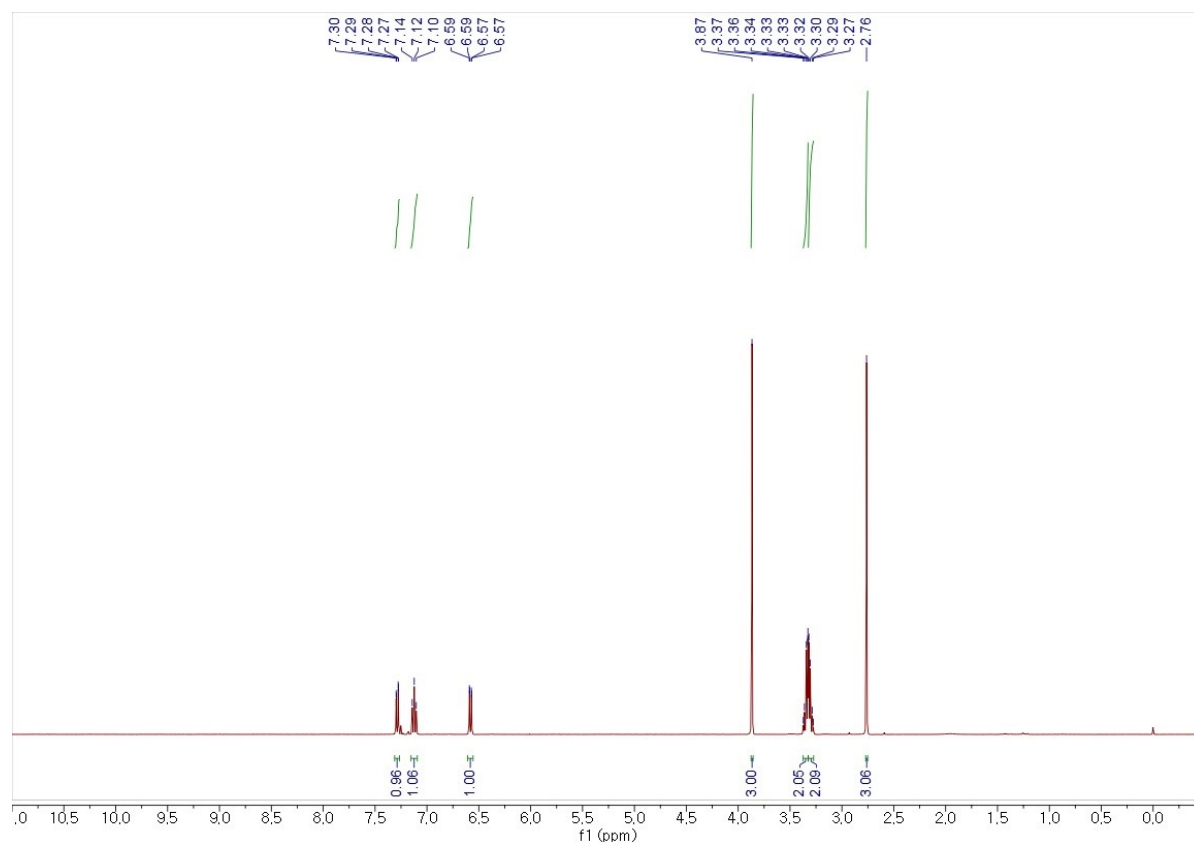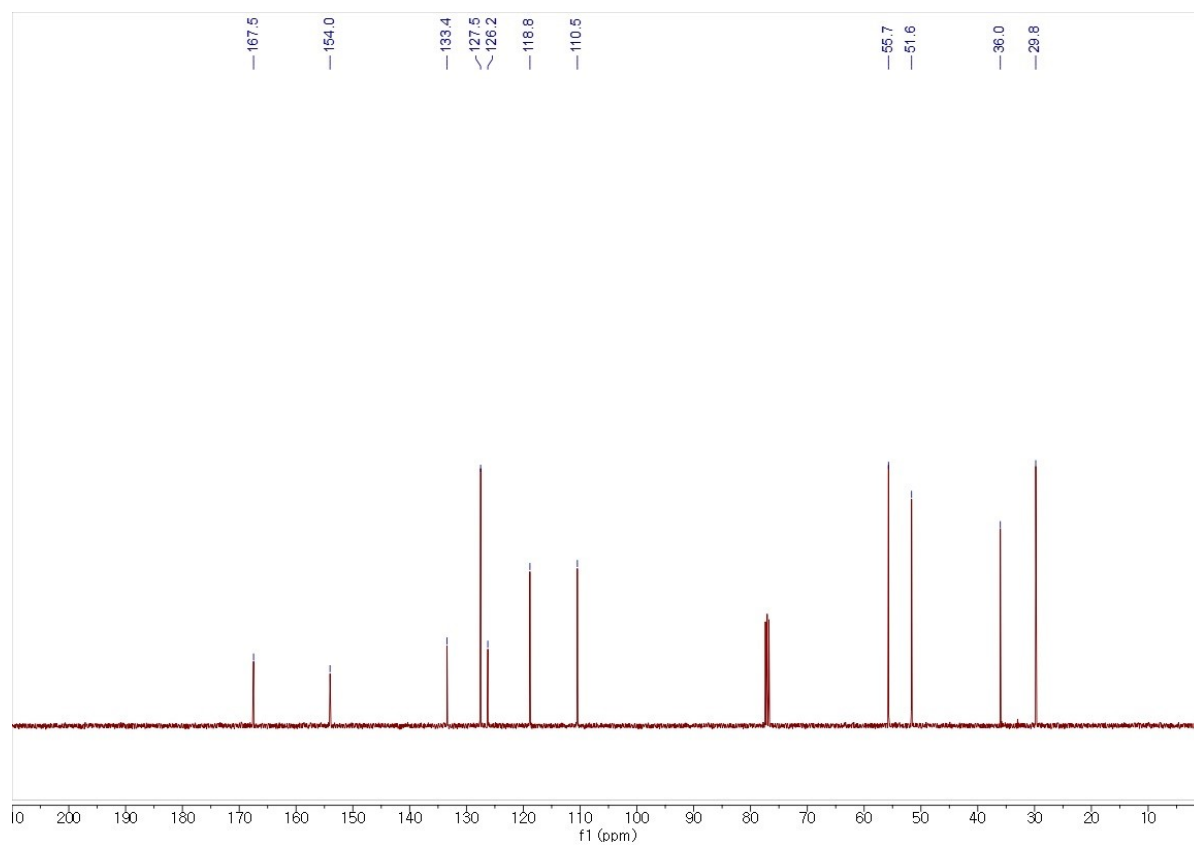

# 1-methylindoline-4-carbonitrile (4m)

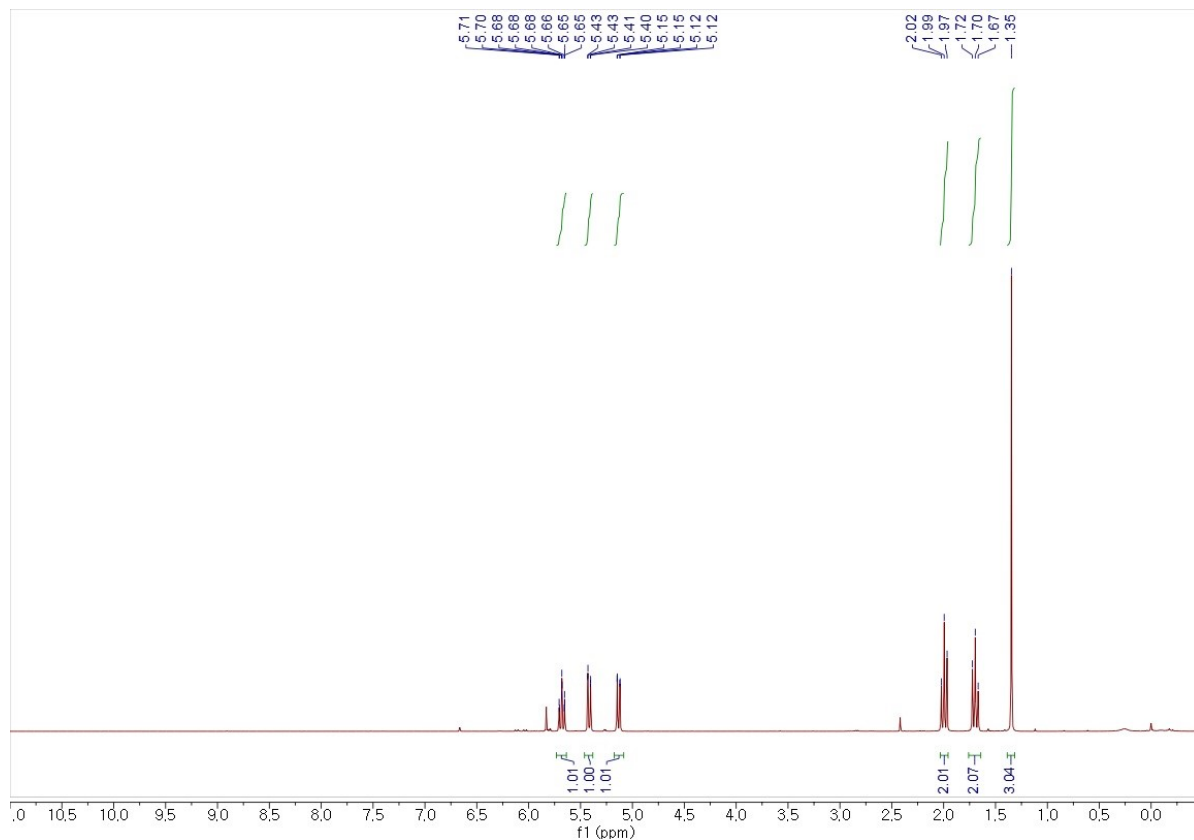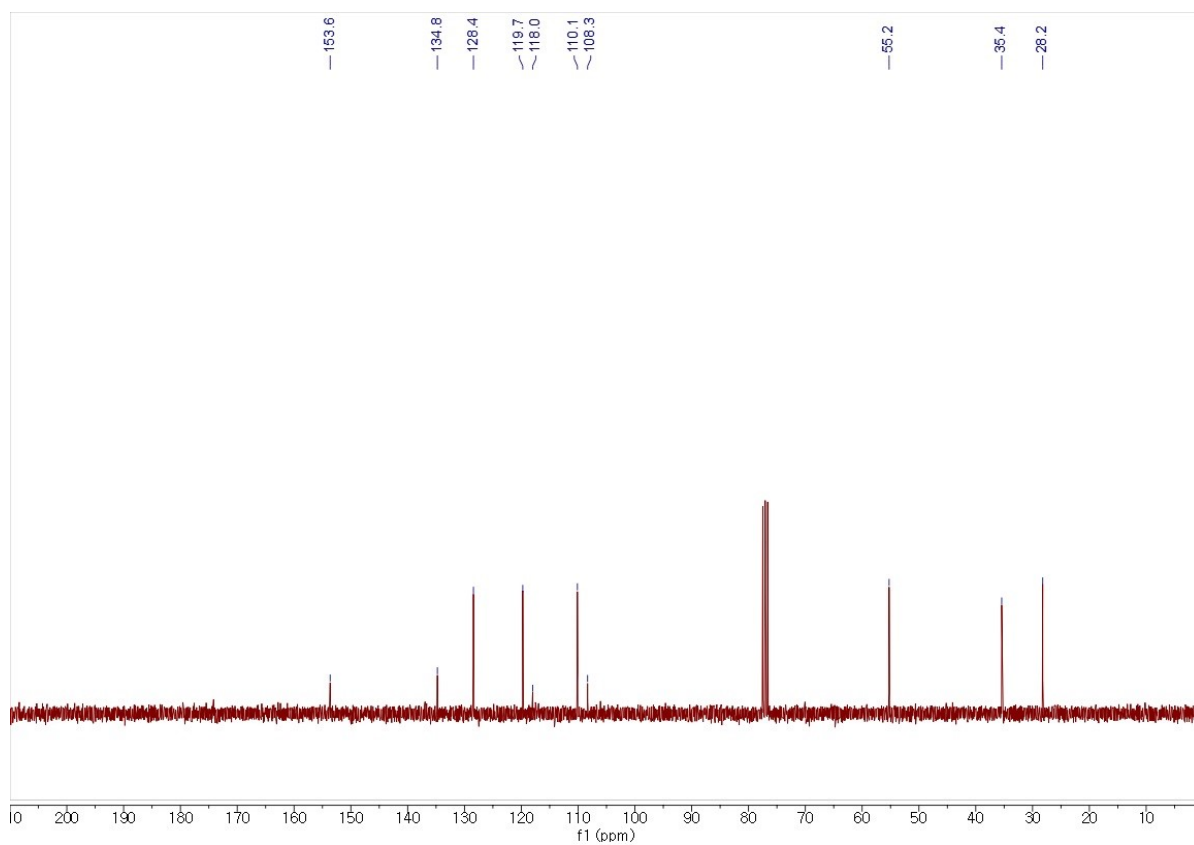

### 6-methoxy-1-methylindoline (4n)

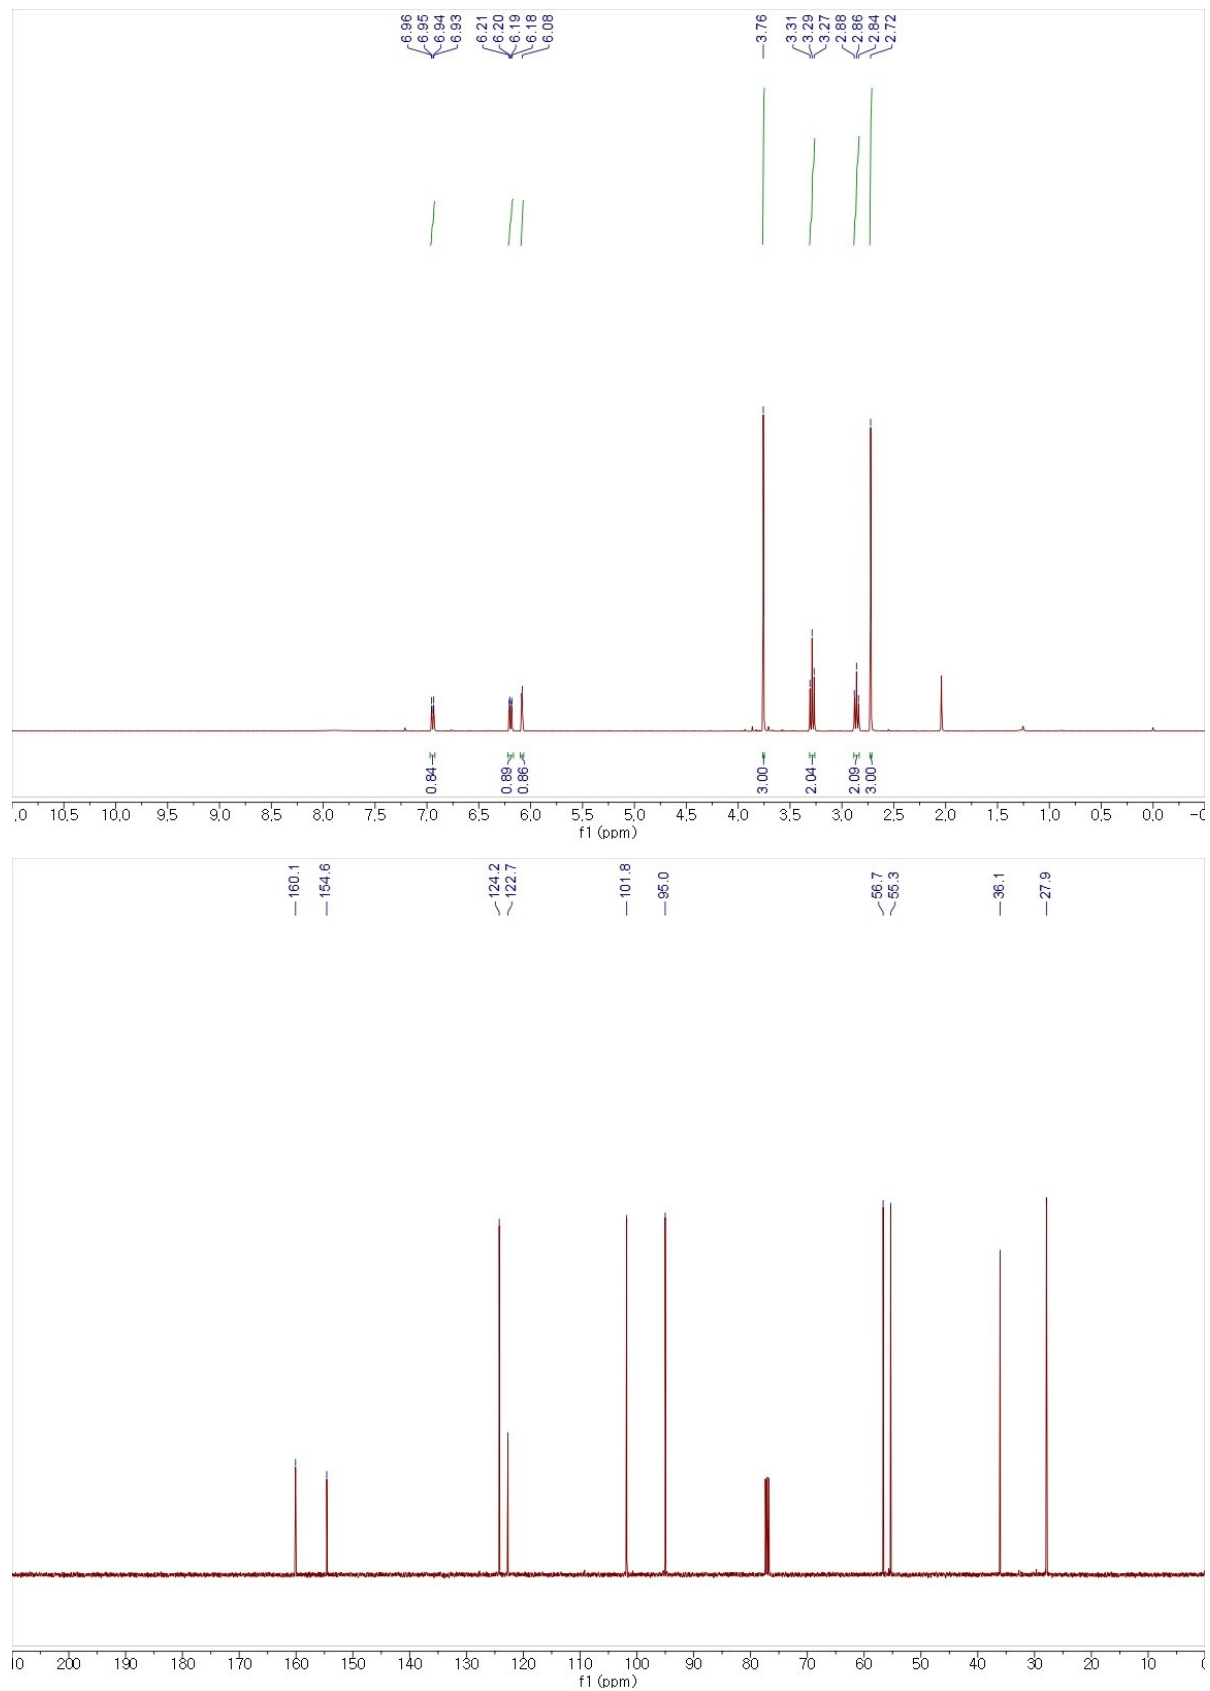

**5-chloro-1-methyl-1*H*-indole (5a)**

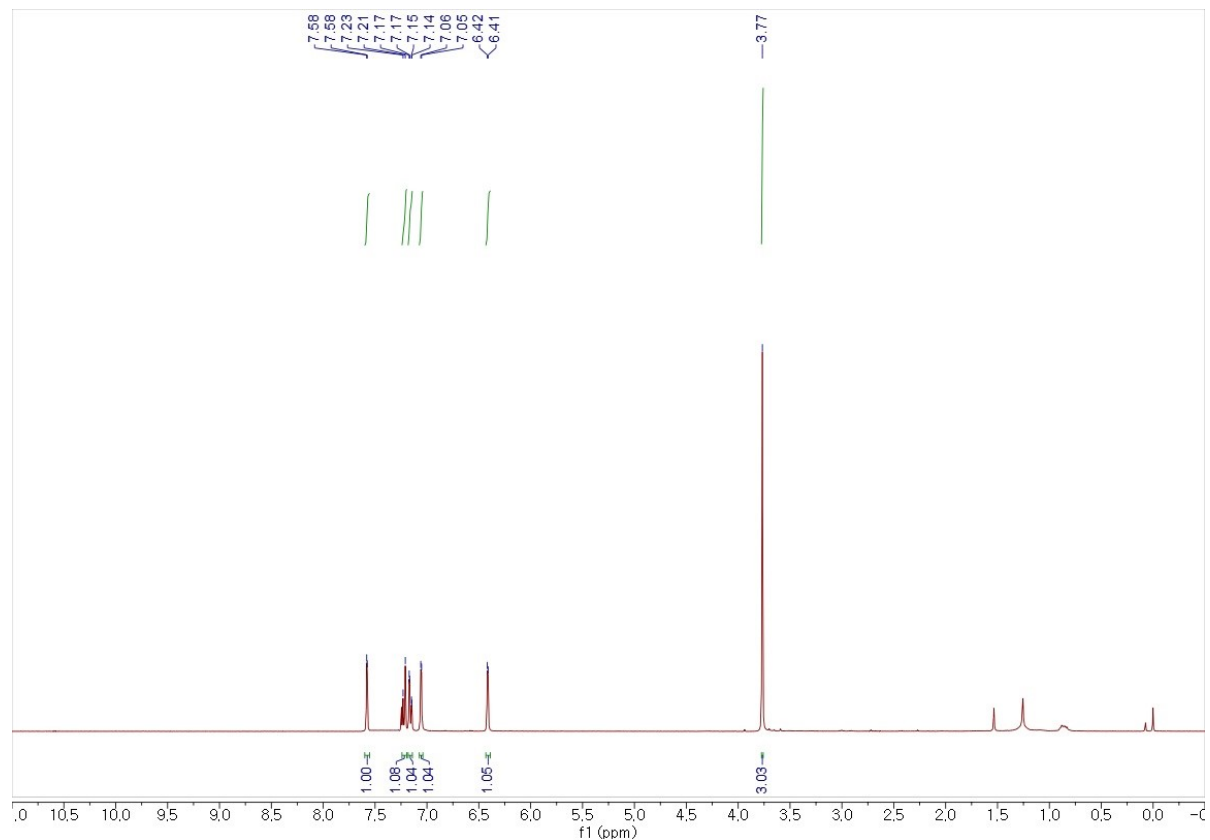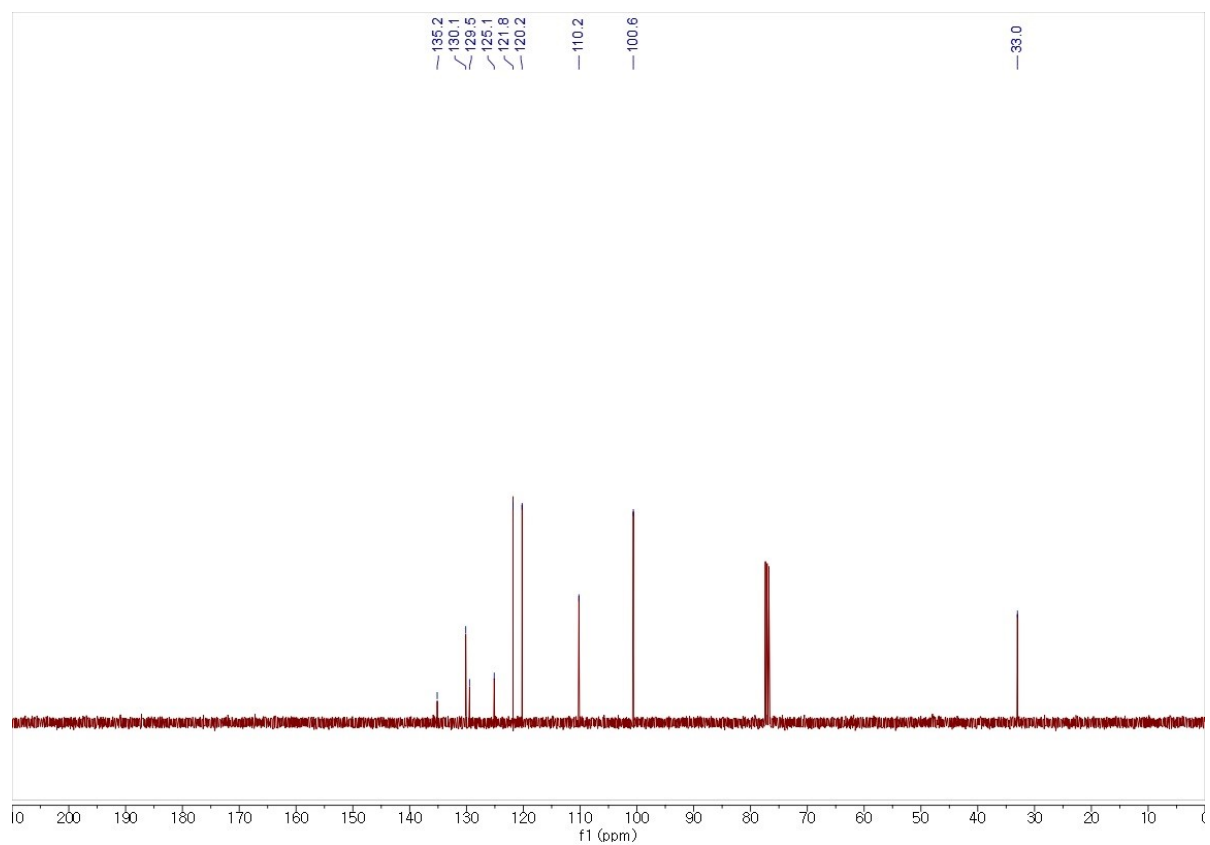

**5-methoxy-1-methyl-1*H*-indole (5b)**

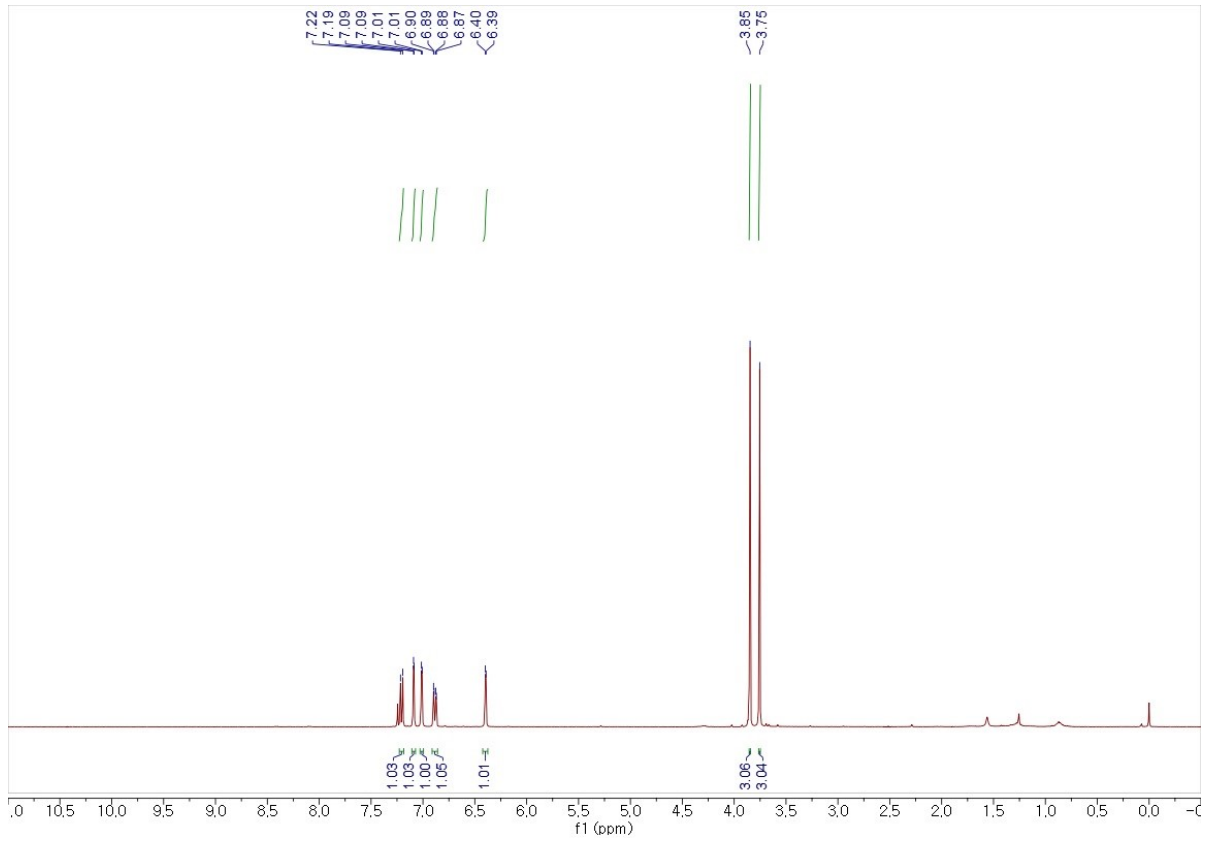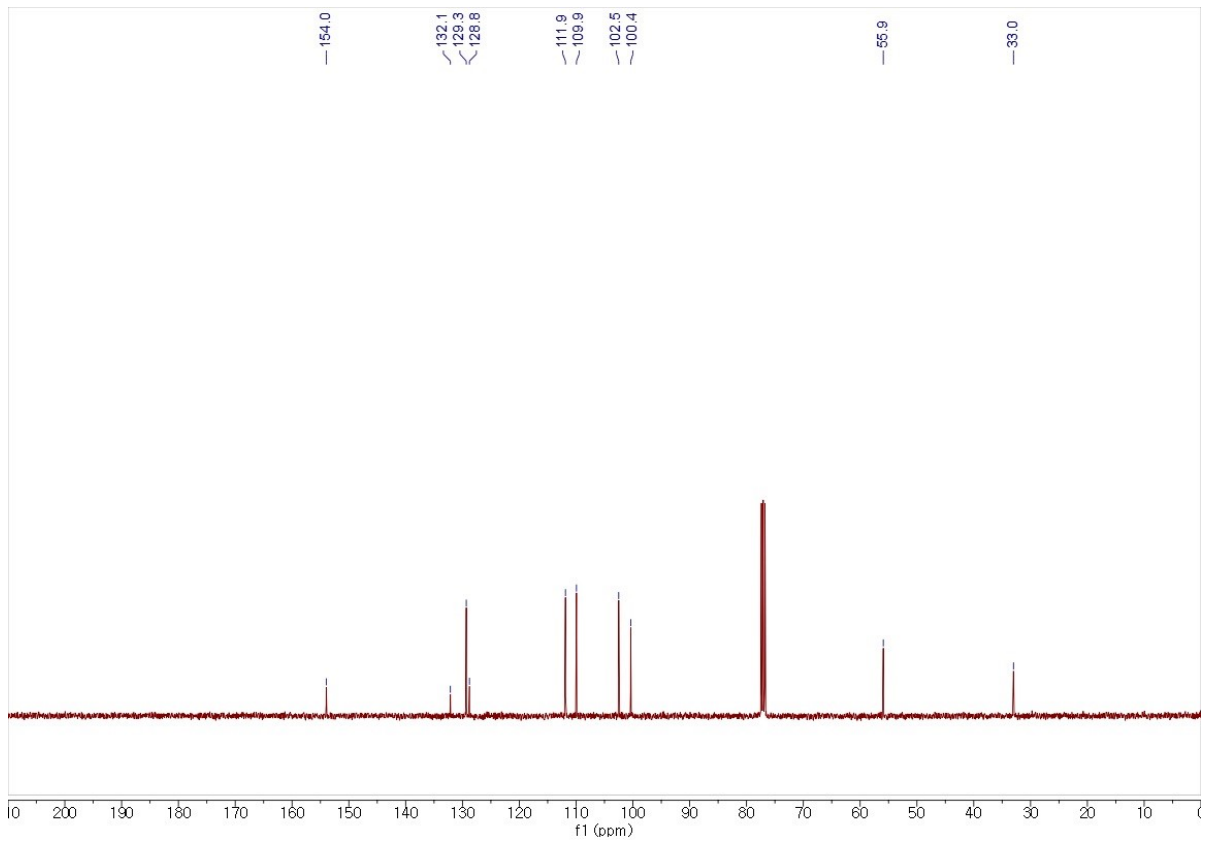

1,5-dimethyl-1*H*-indole (5c)

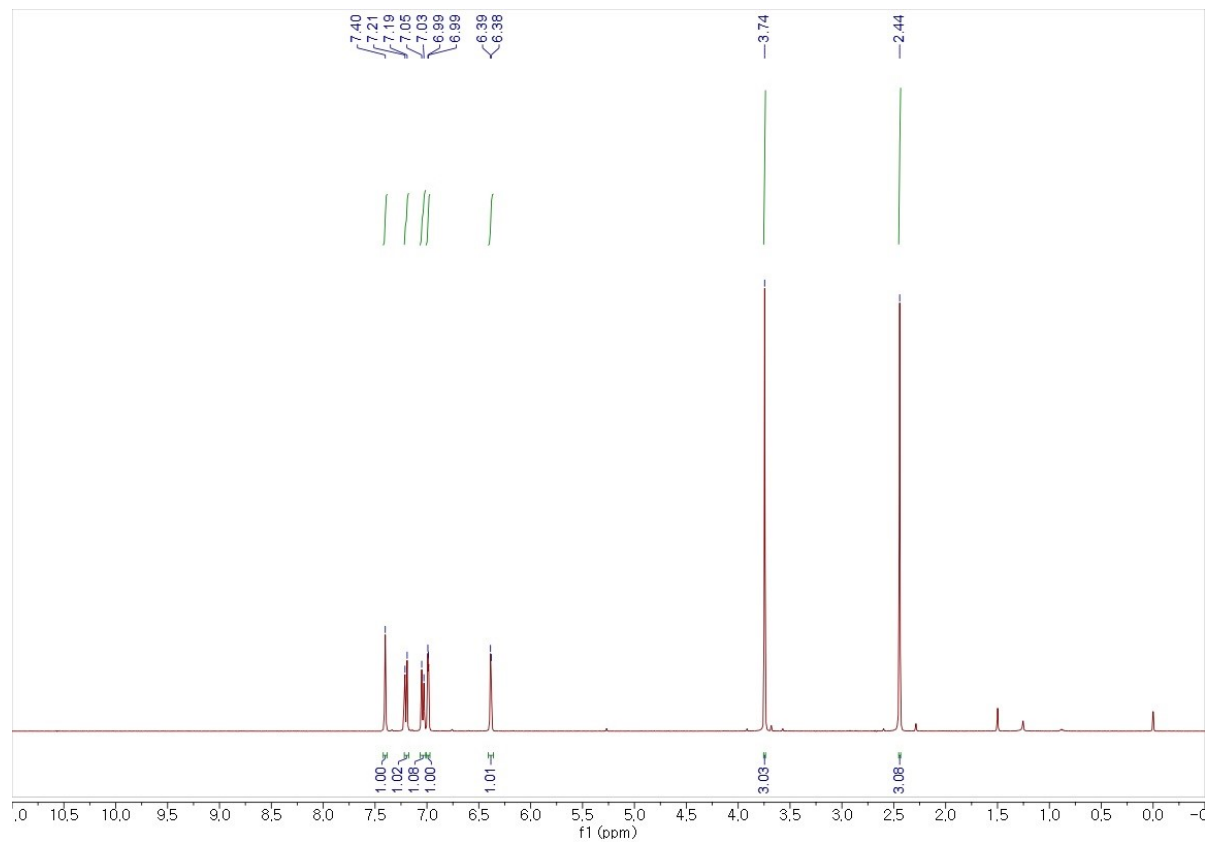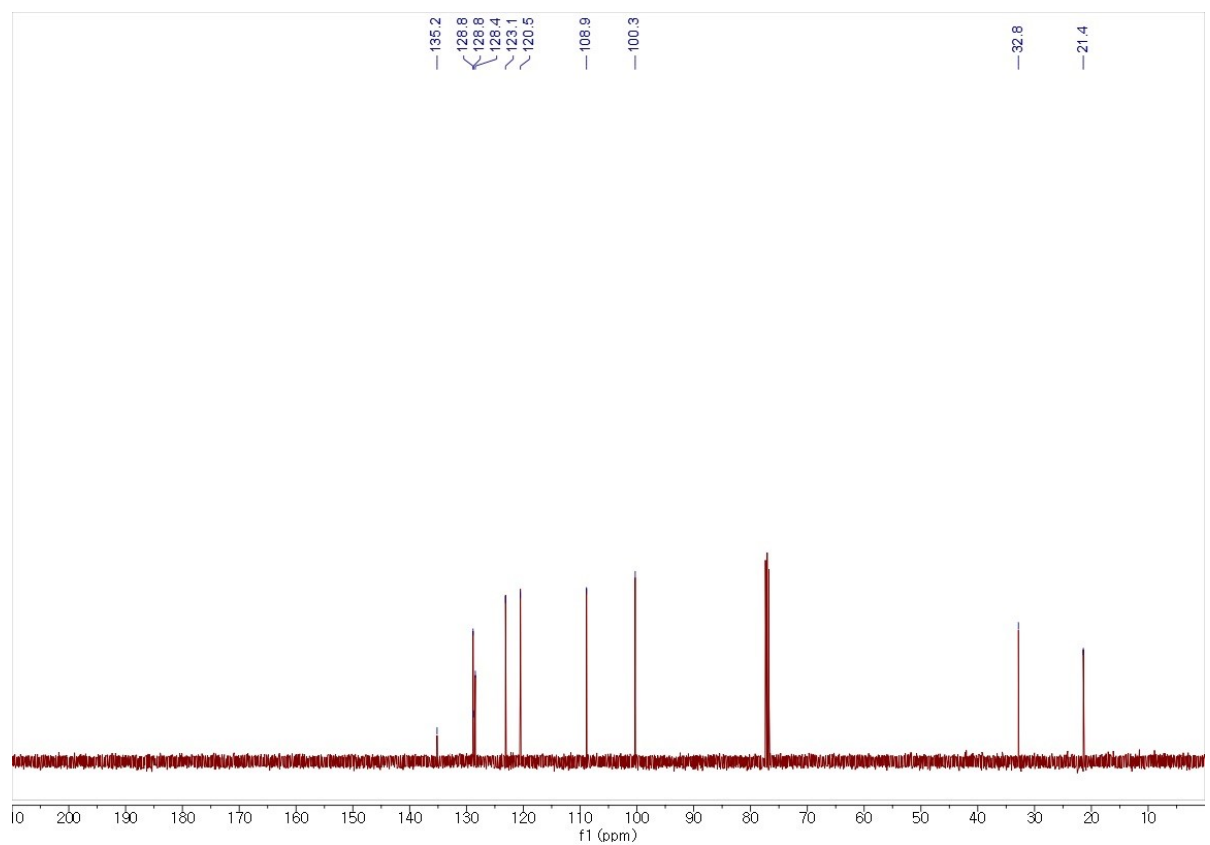

**1-methyl-1H-indole (5d)**

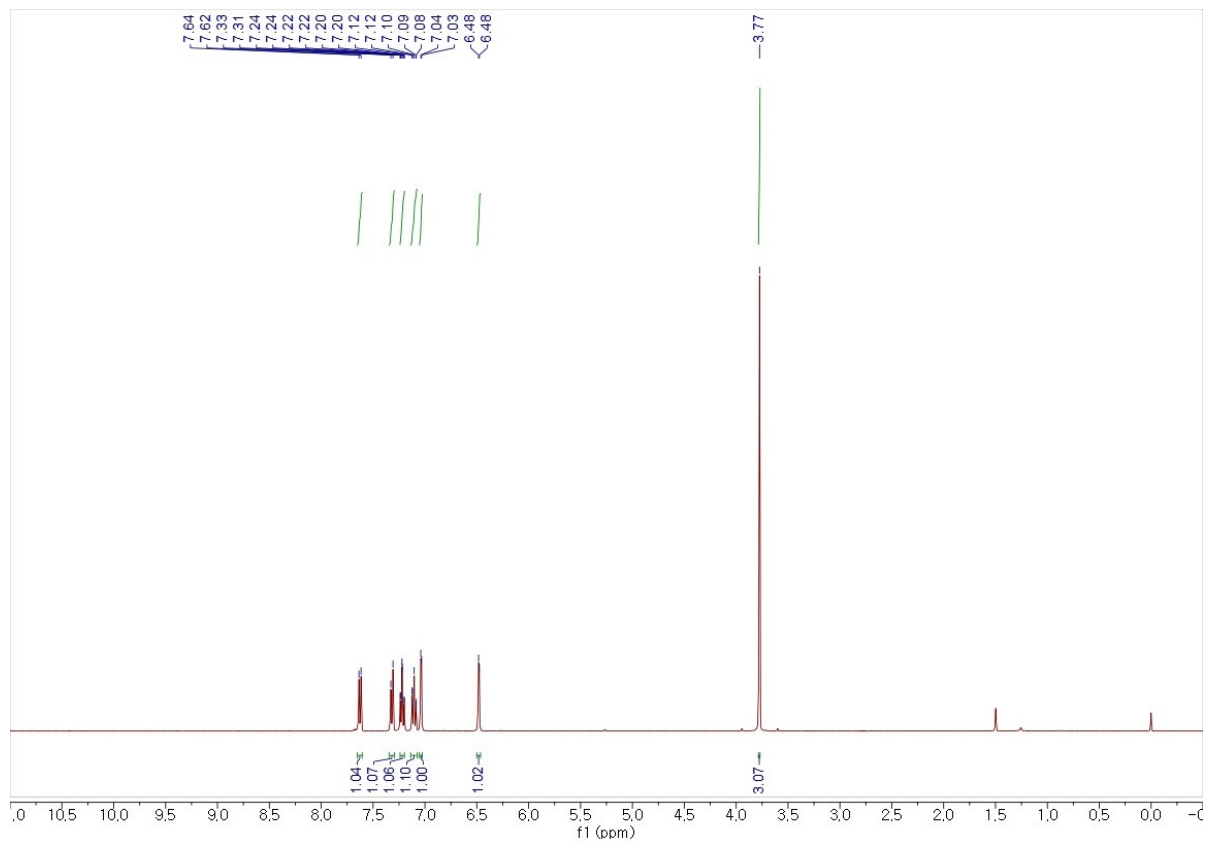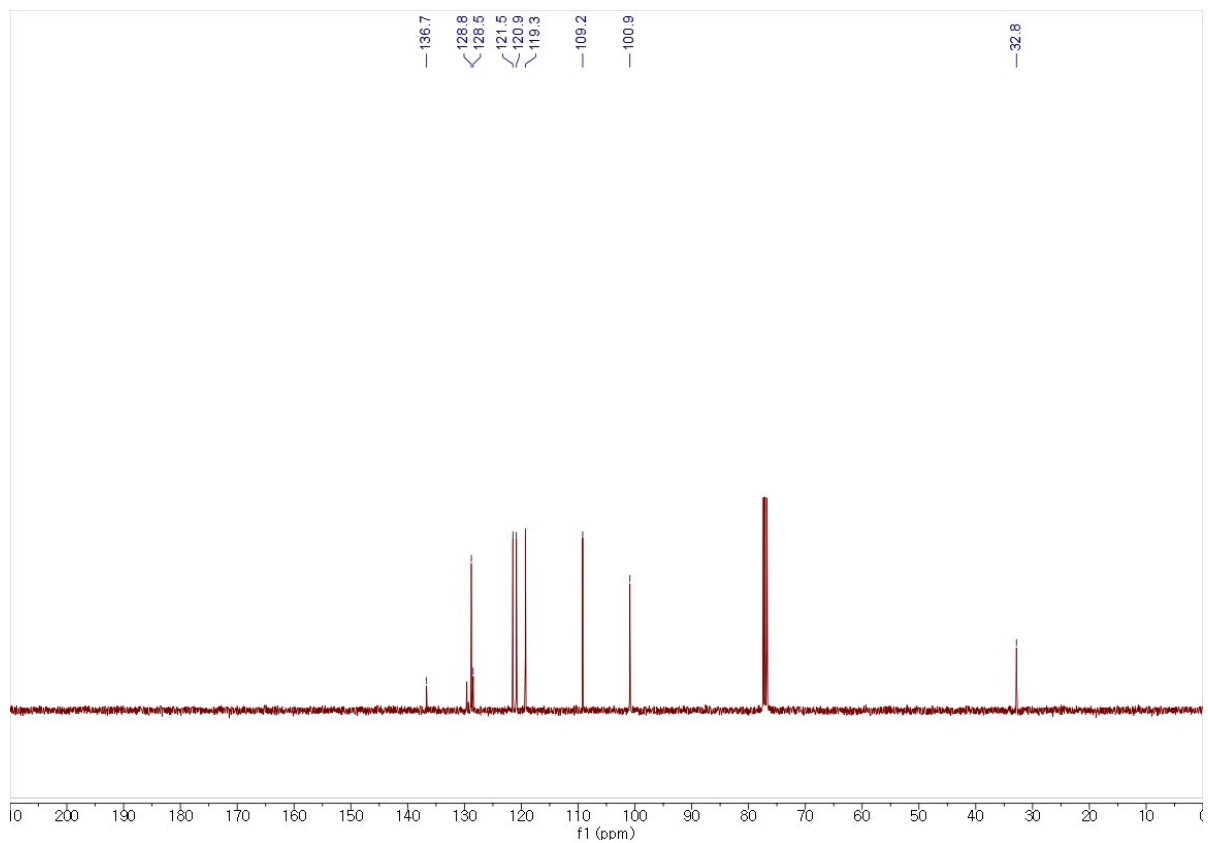

**5-bromo-1-methyl-1*H*-indole (5e)**

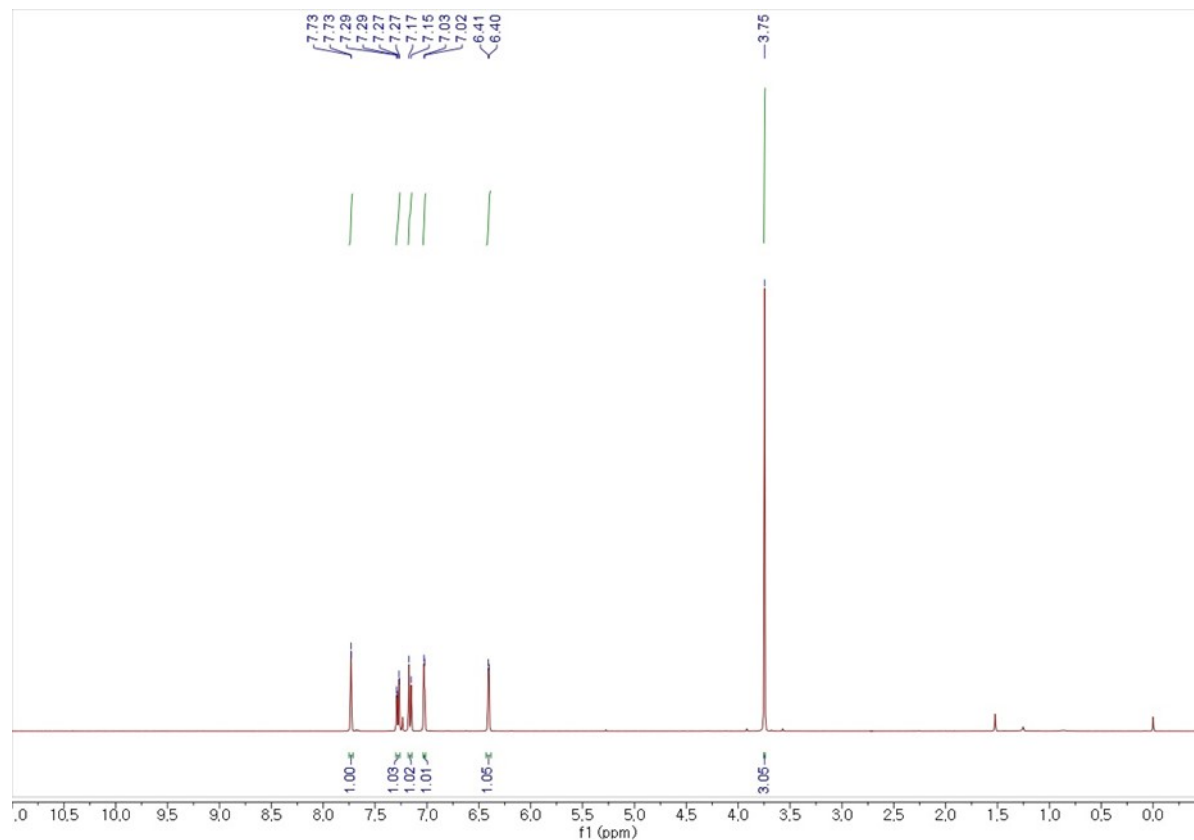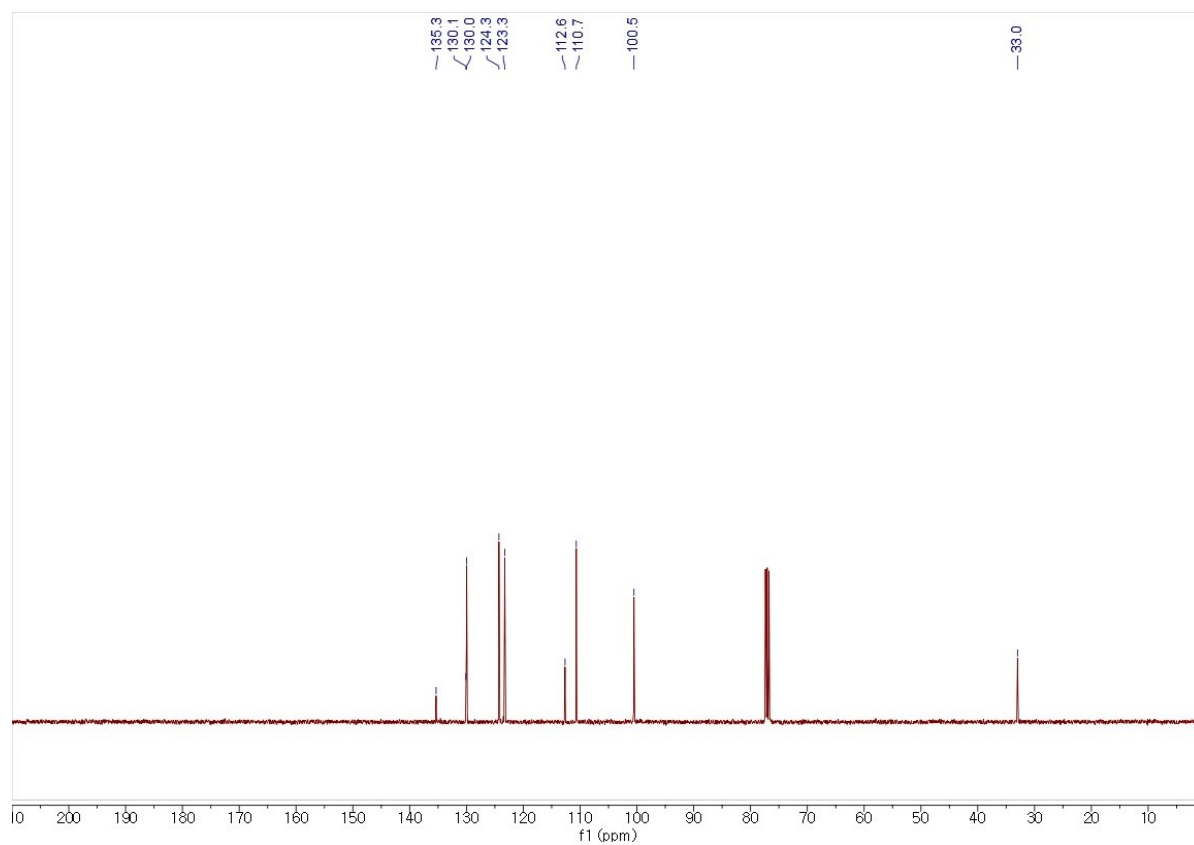



**5-fluoro-1-methyl-1H-indole (5f)**

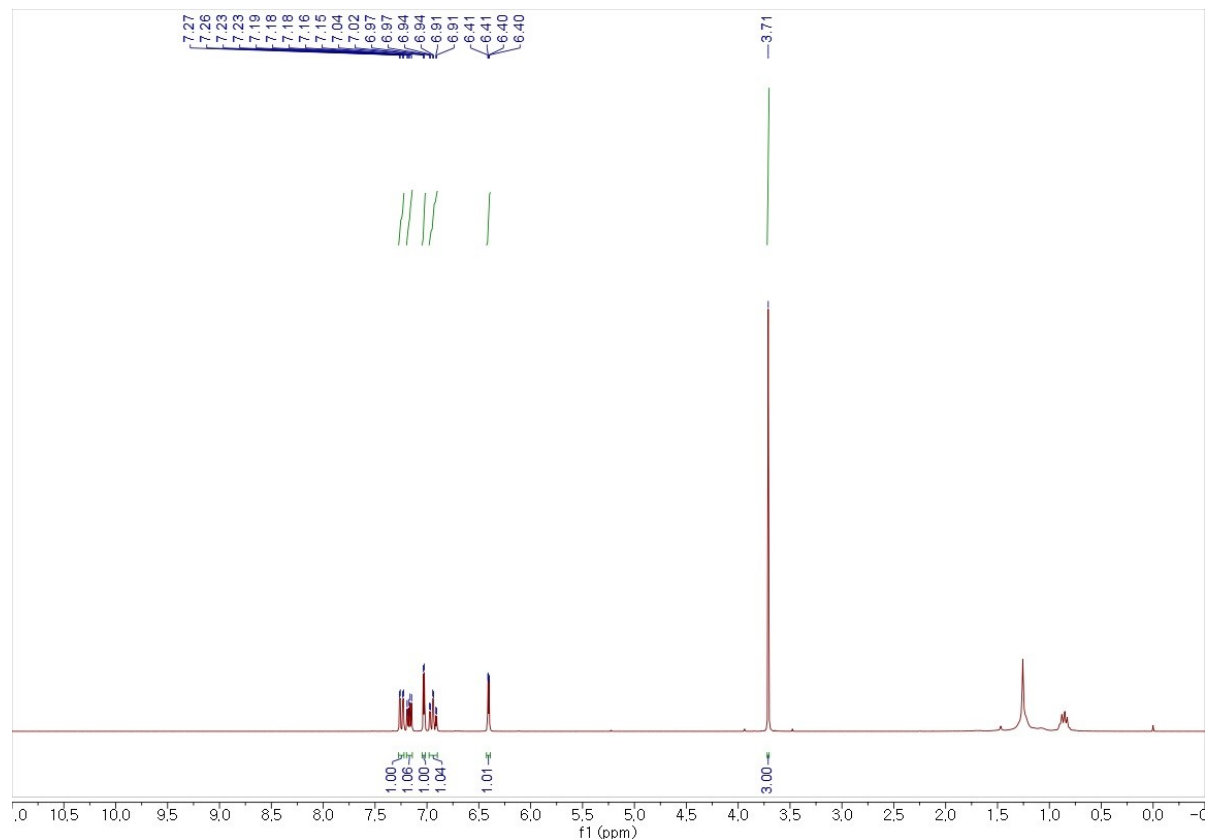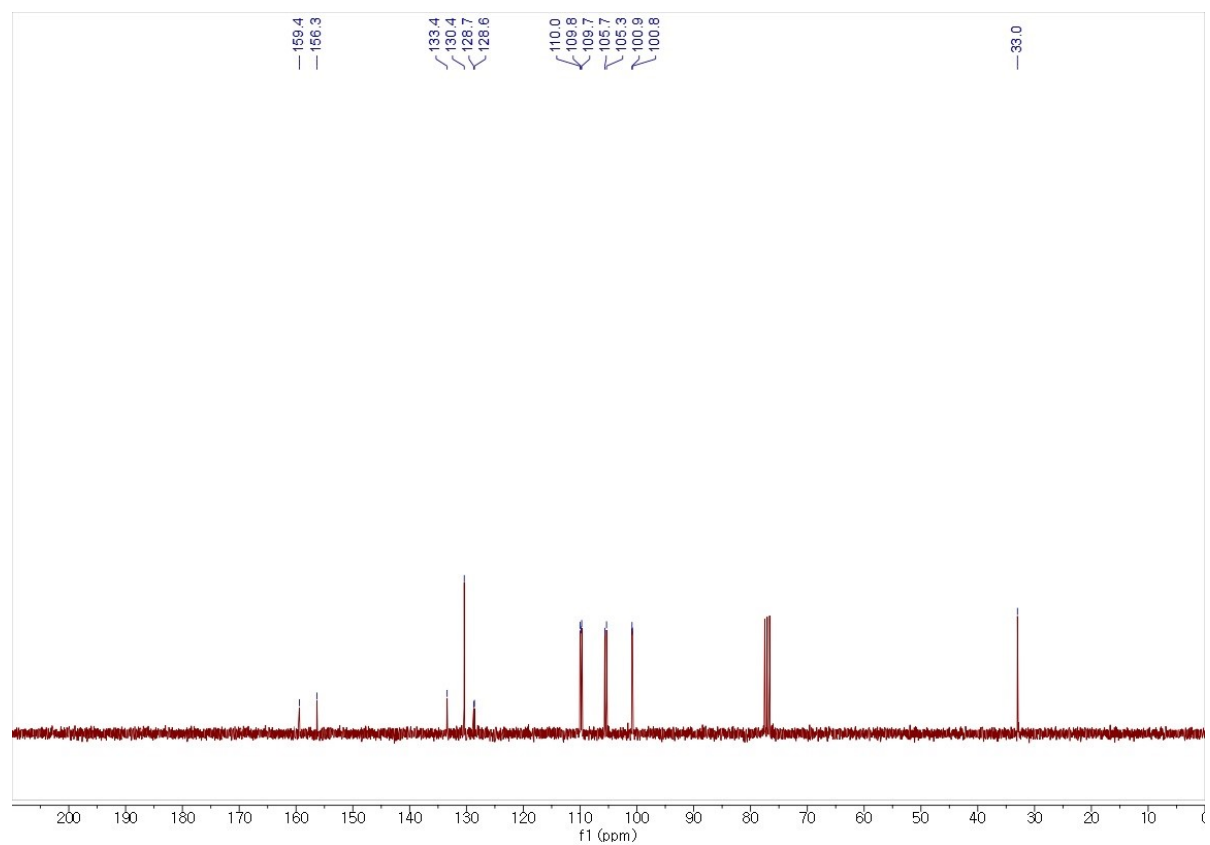

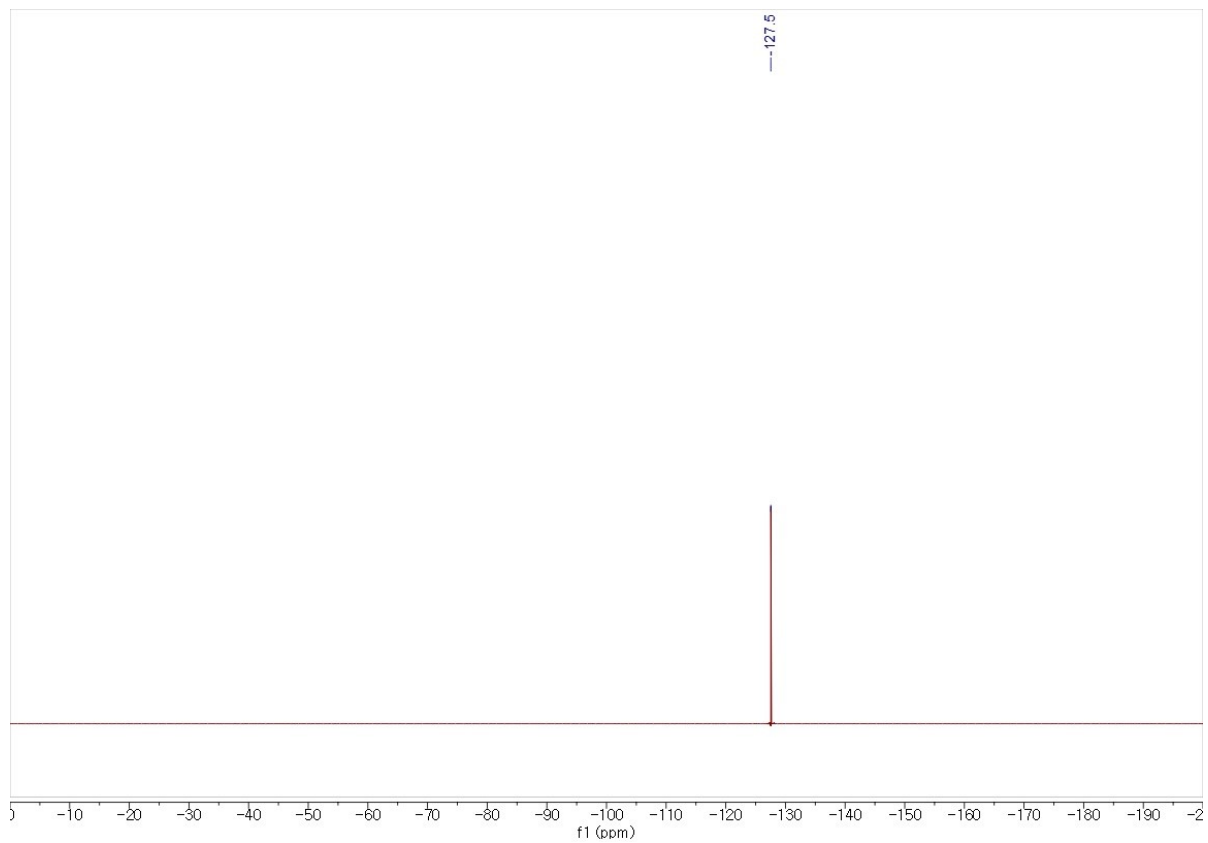

### 1-methyl-1*H*-indole-5-carbonitrile (5g)

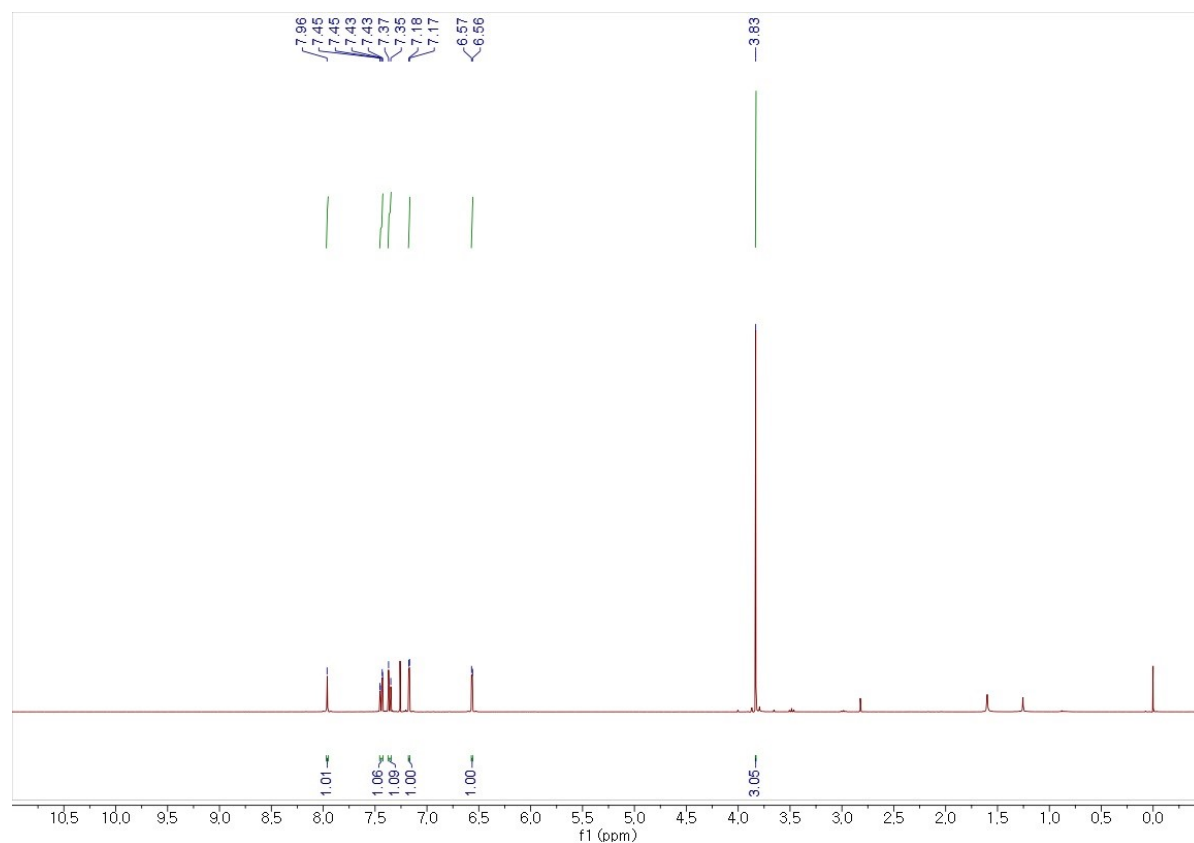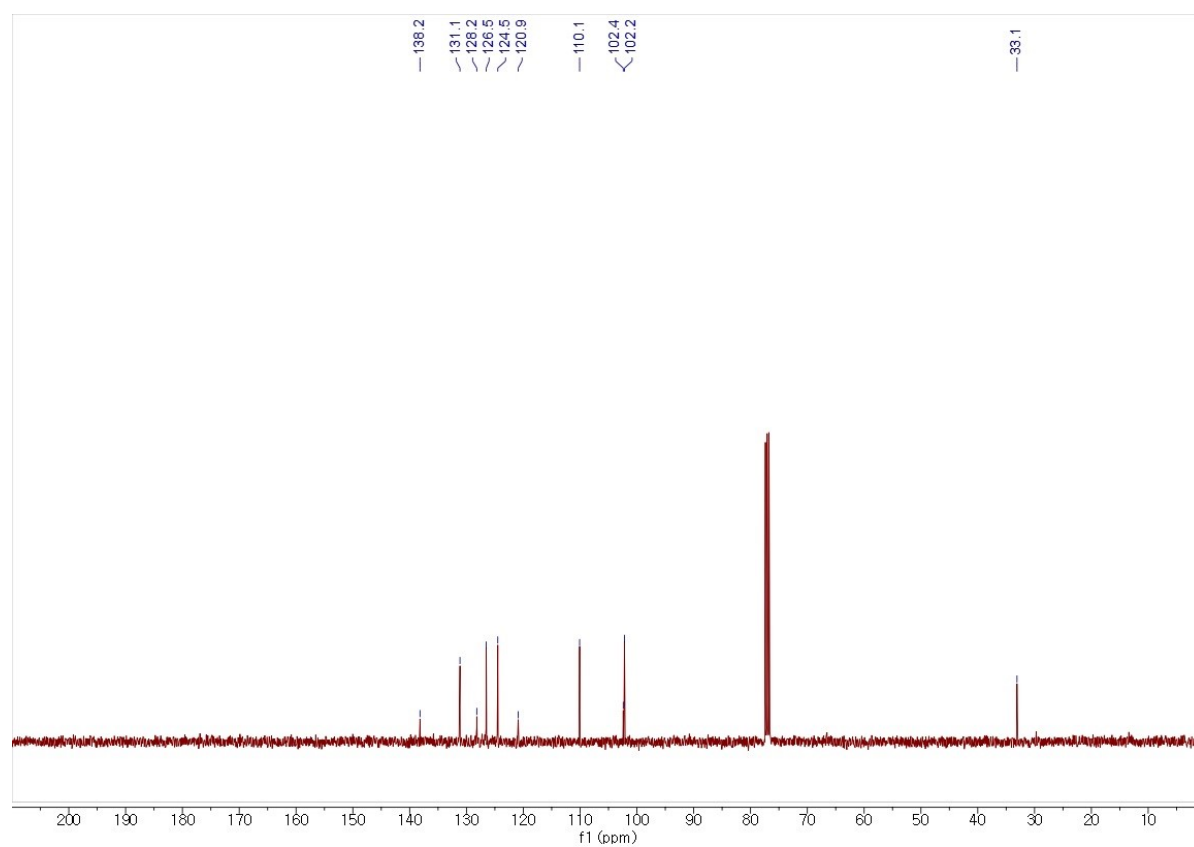

**1-methyl-5-nitro-1H-indole (5h)**

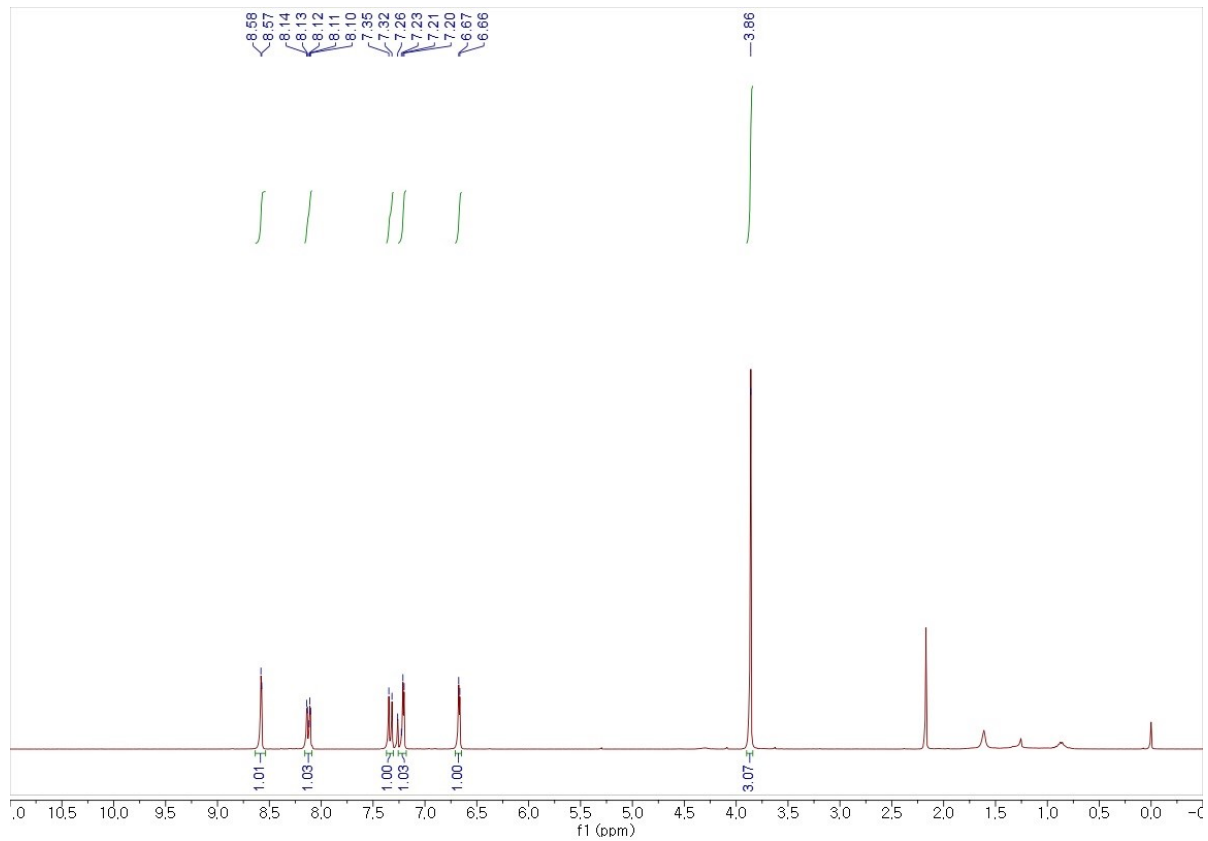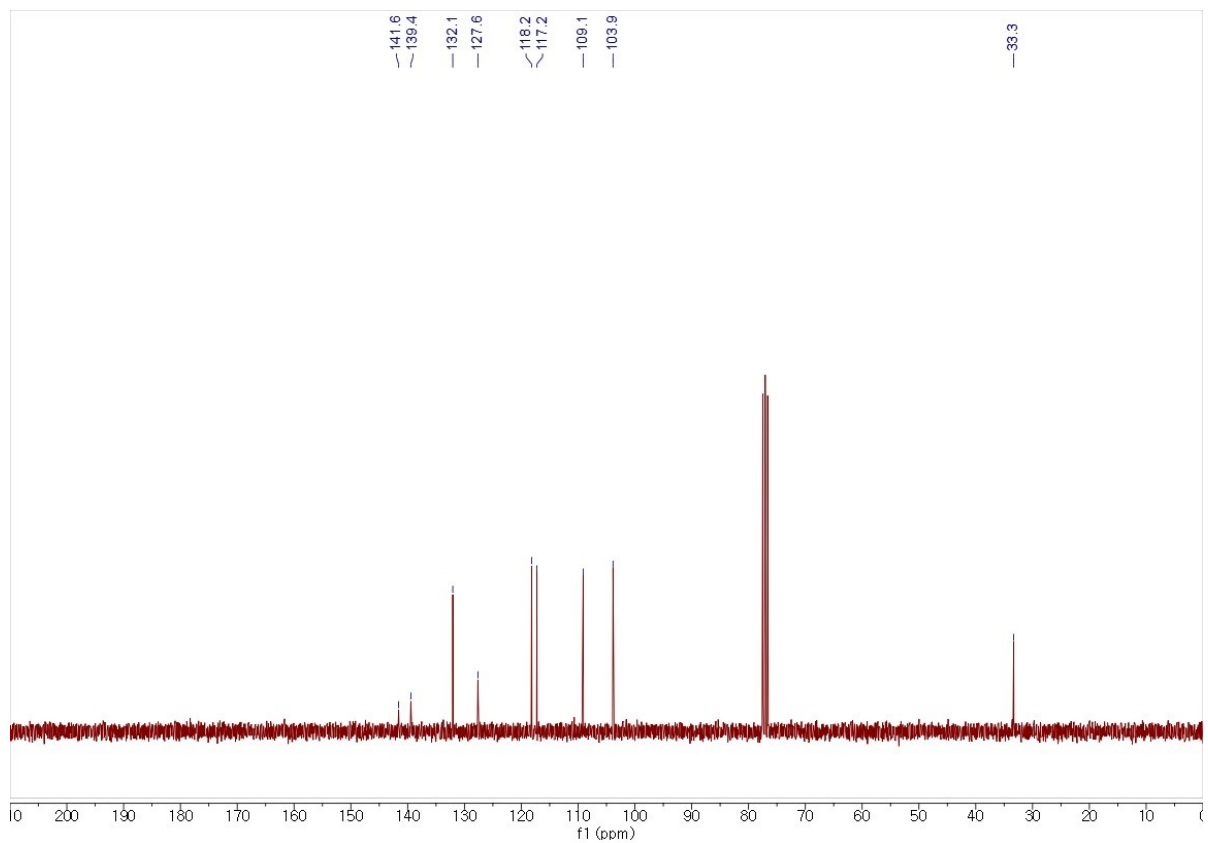

**4-methoxy-1-methyl-1H-indole (5i)**

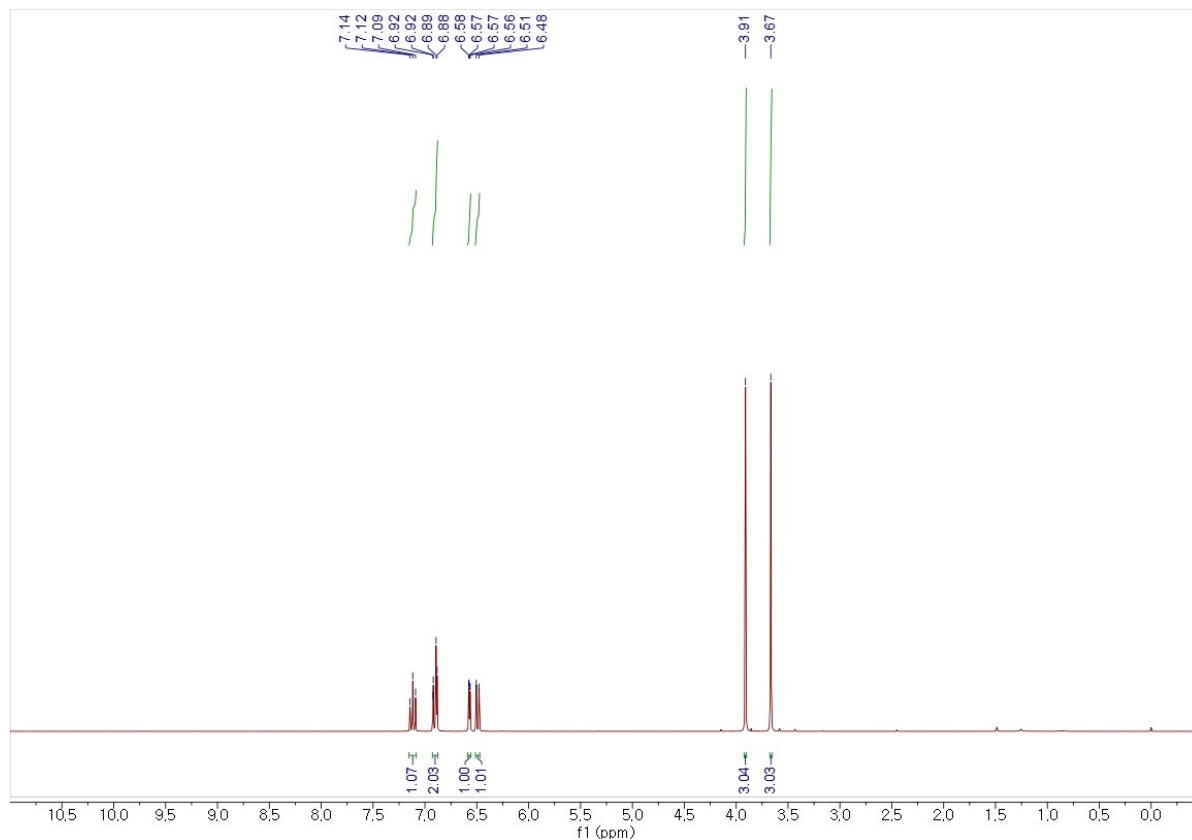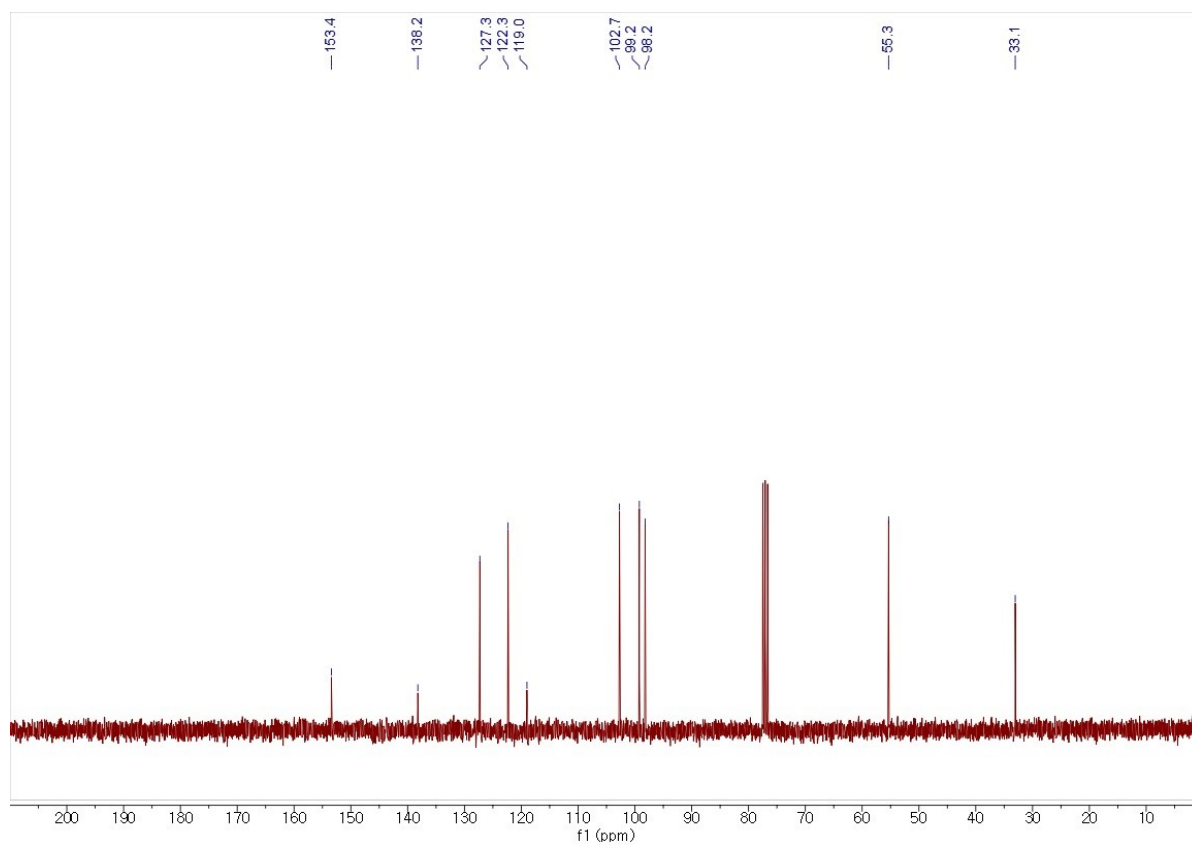

**4-bromo-1-methyl-1*H*-indole (5j)**

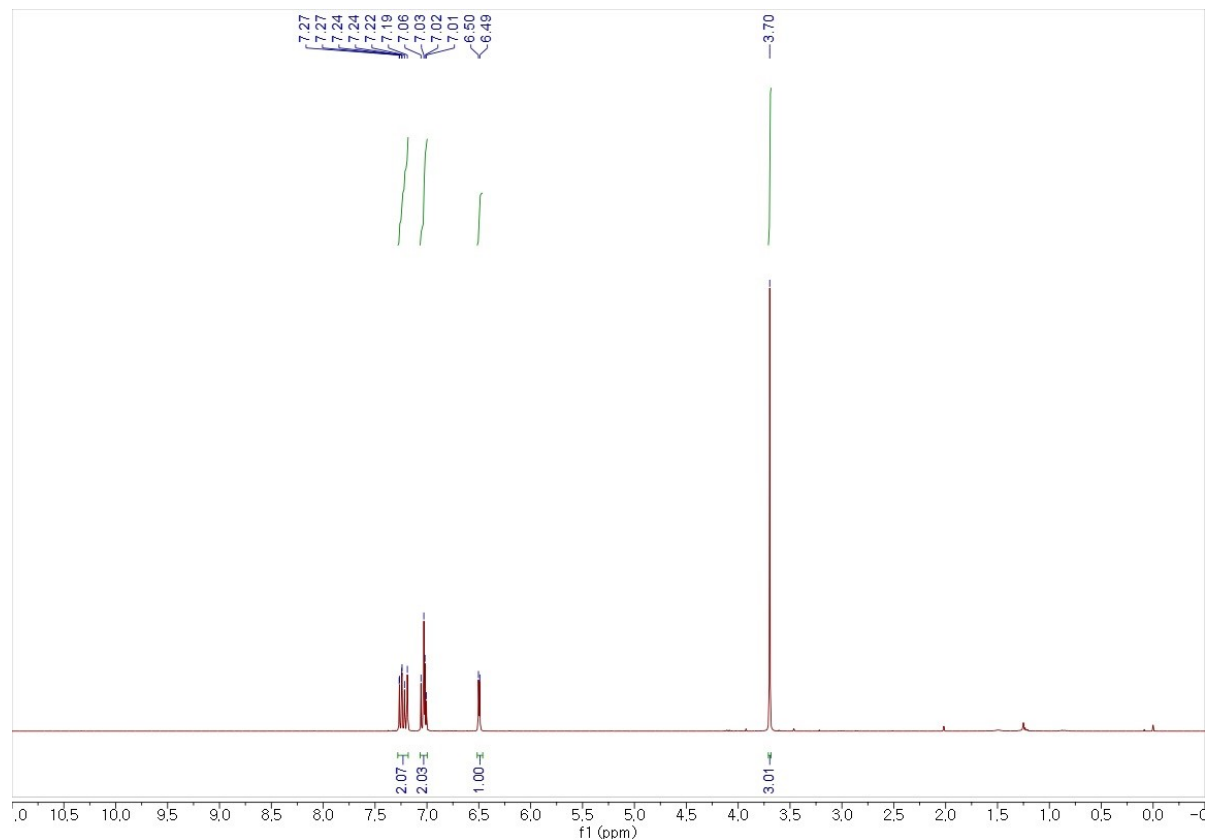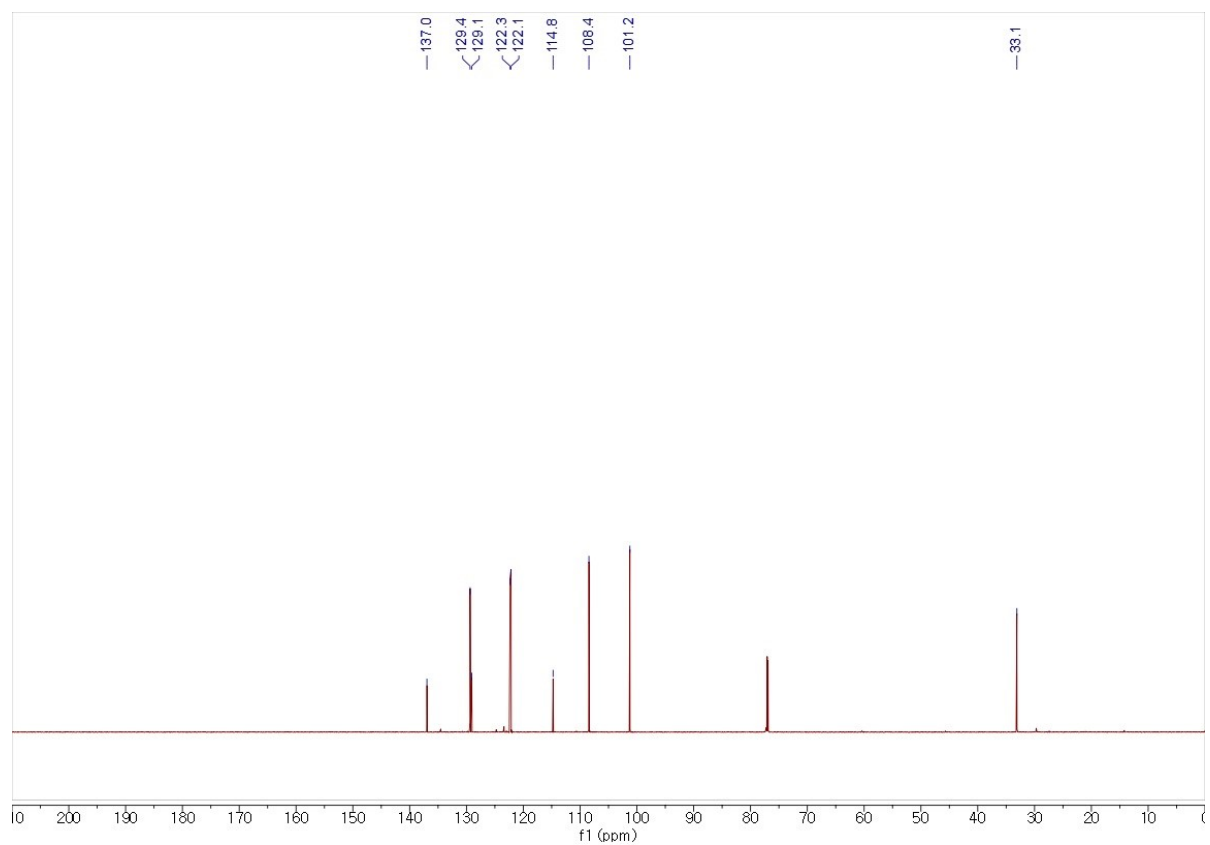

**4-fluoro-1-methyl-1H-indole (5k)**

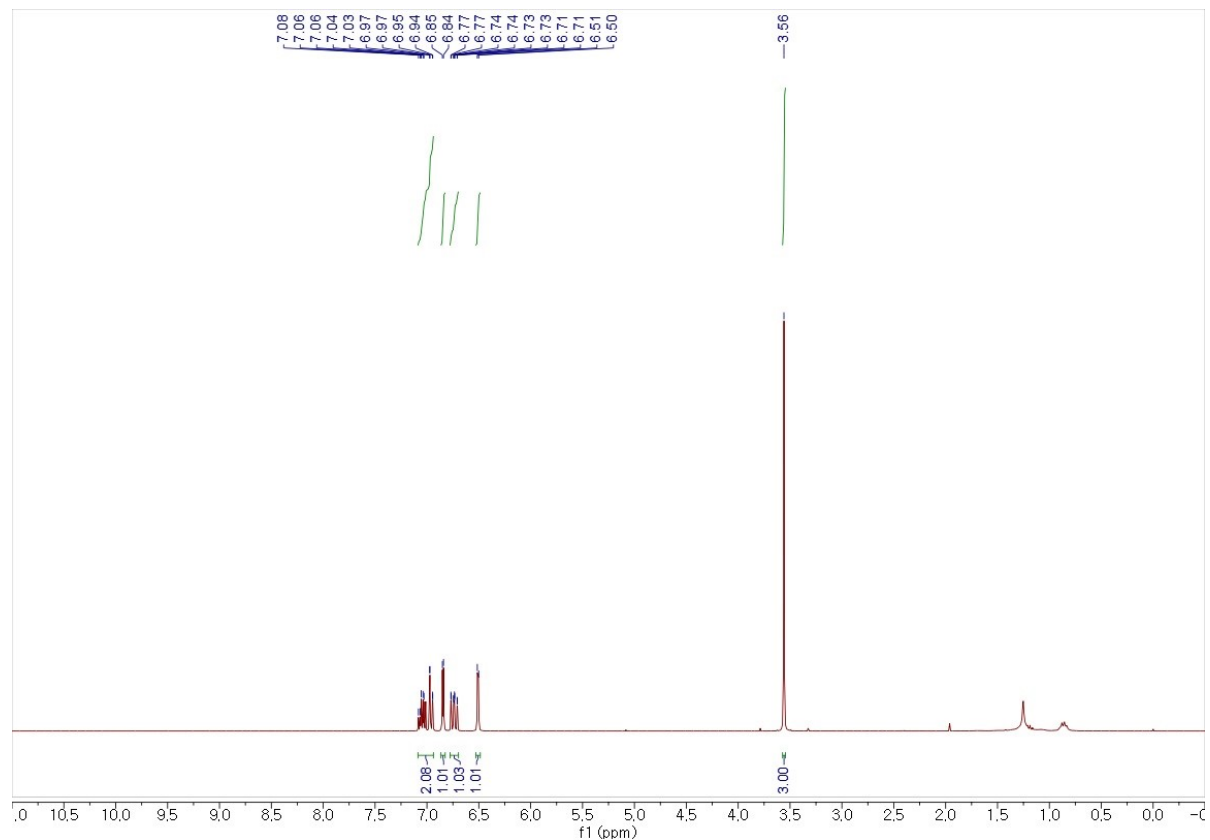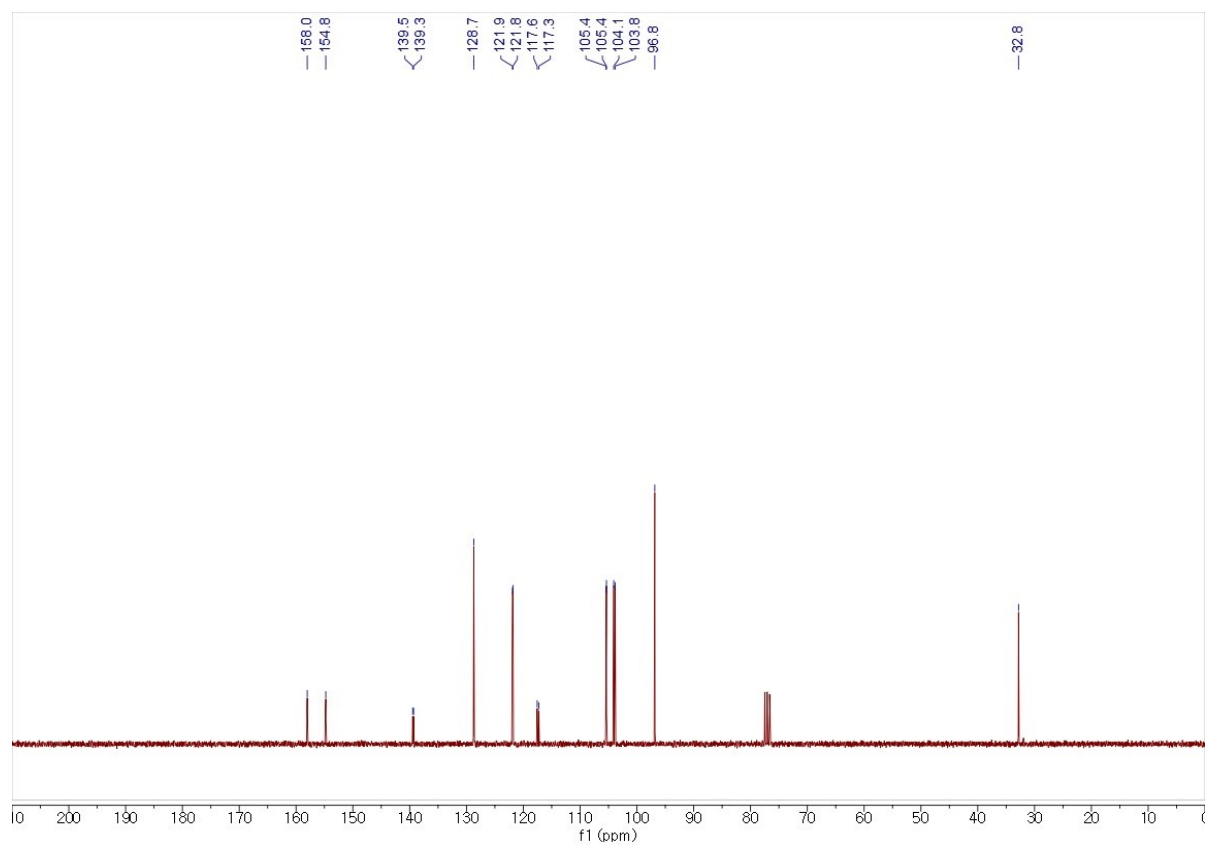

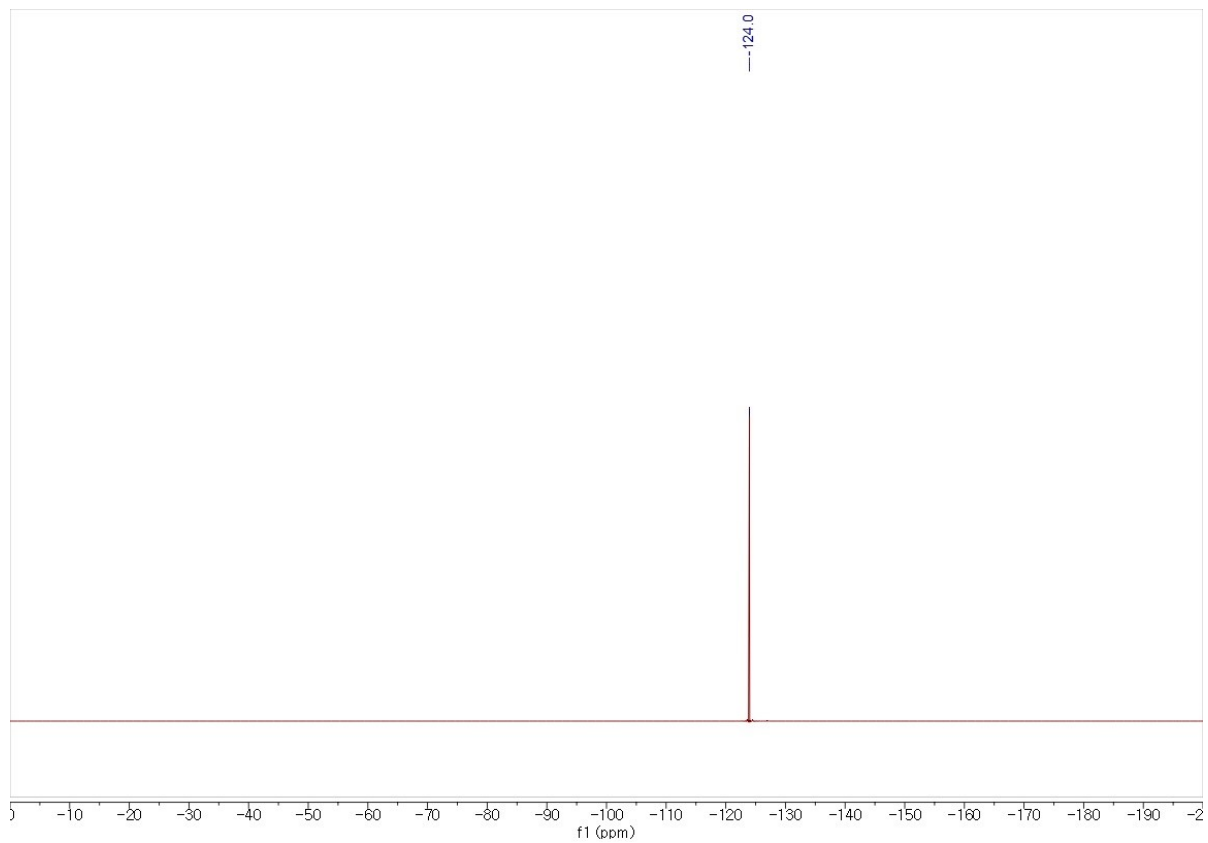



**methyl 1-methyl-1*H*-indole-4-carboxylate (5I)**

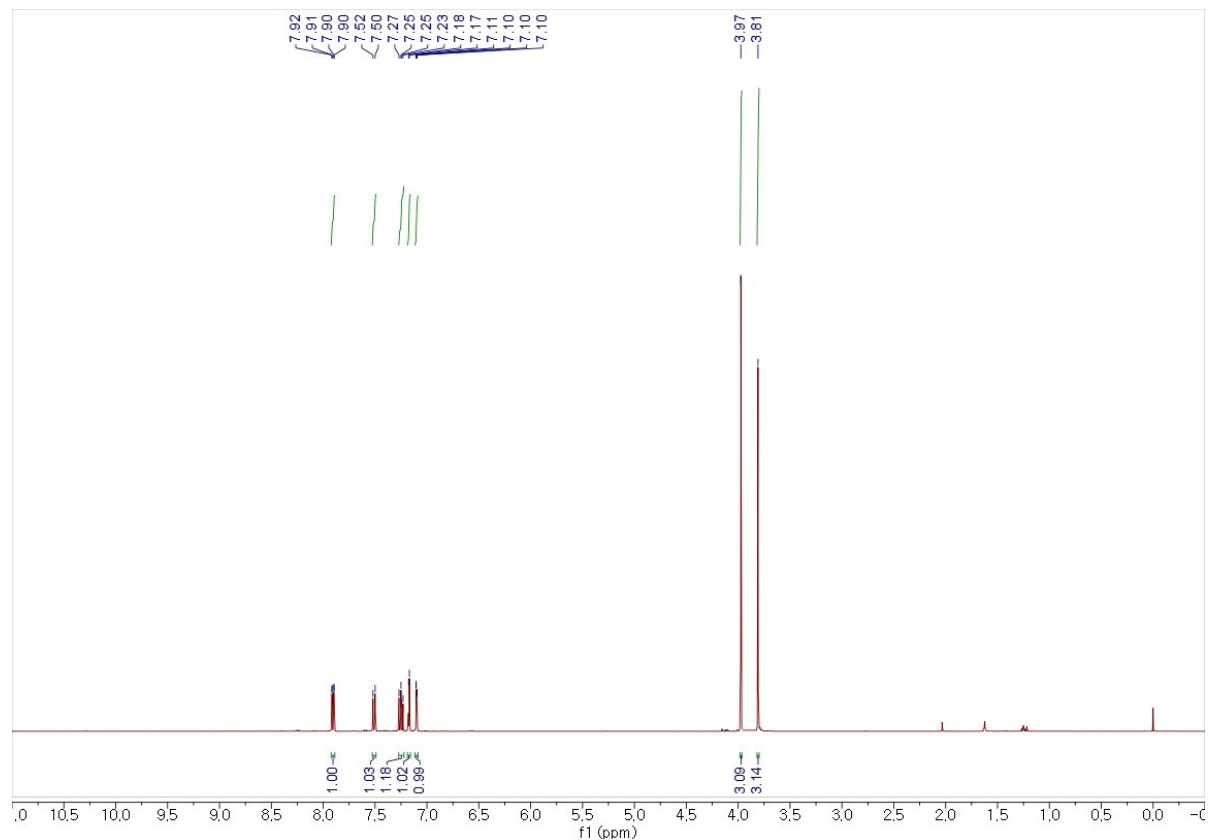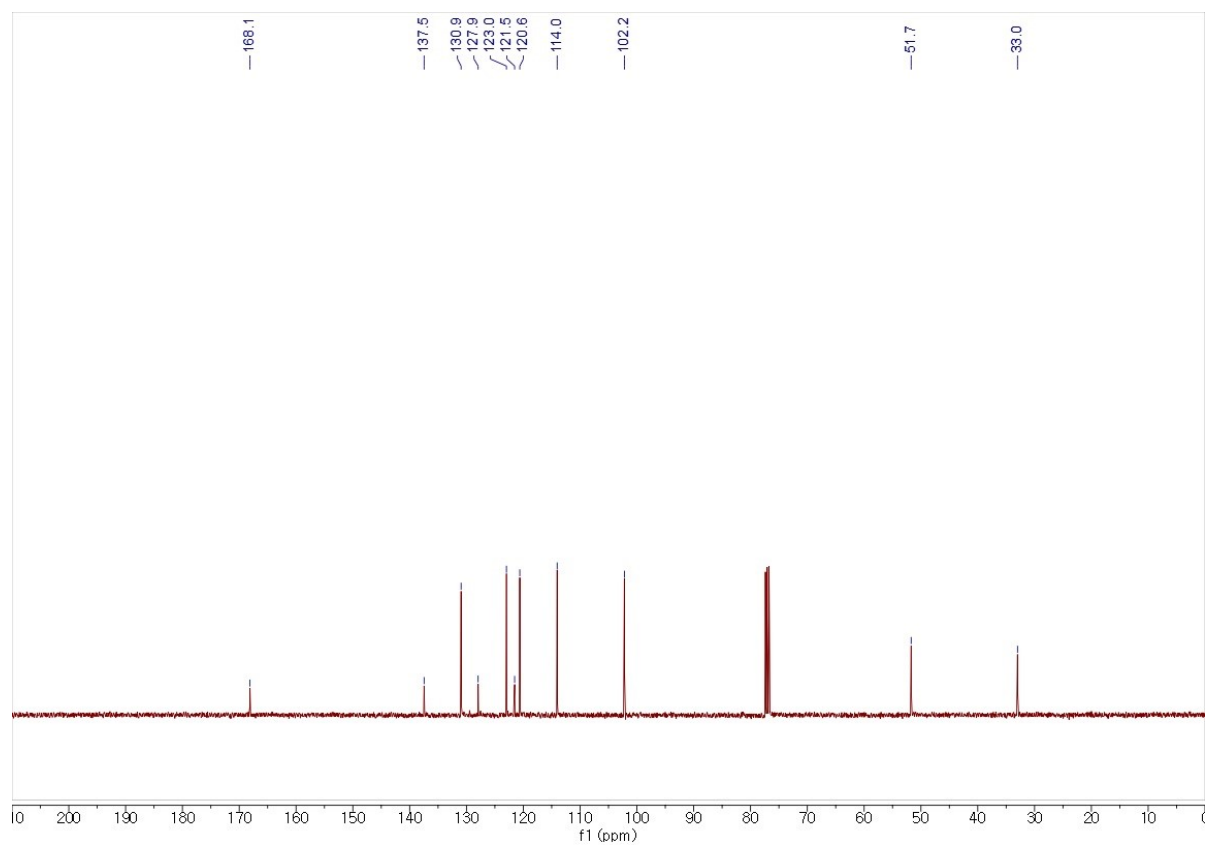

**1-methyl-1*H*-indole-4-carbonitrile (5m)**

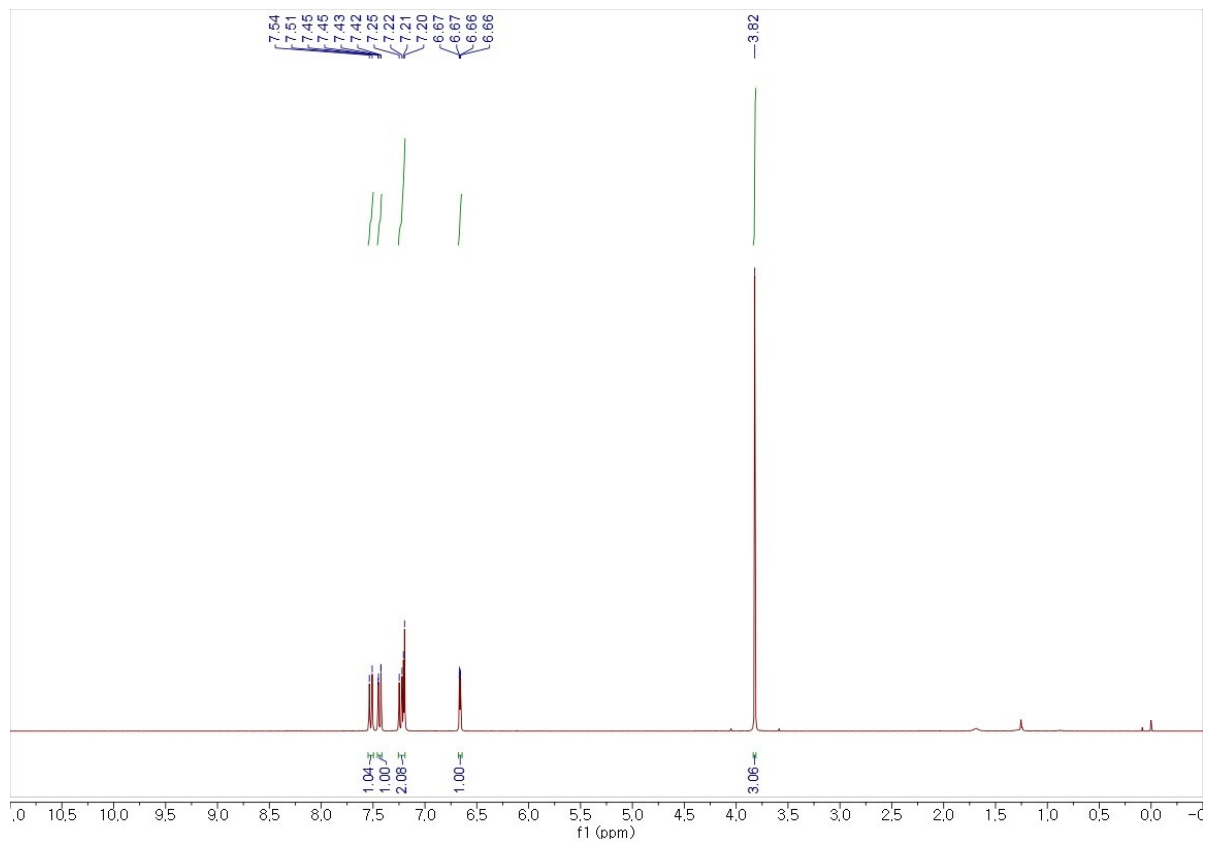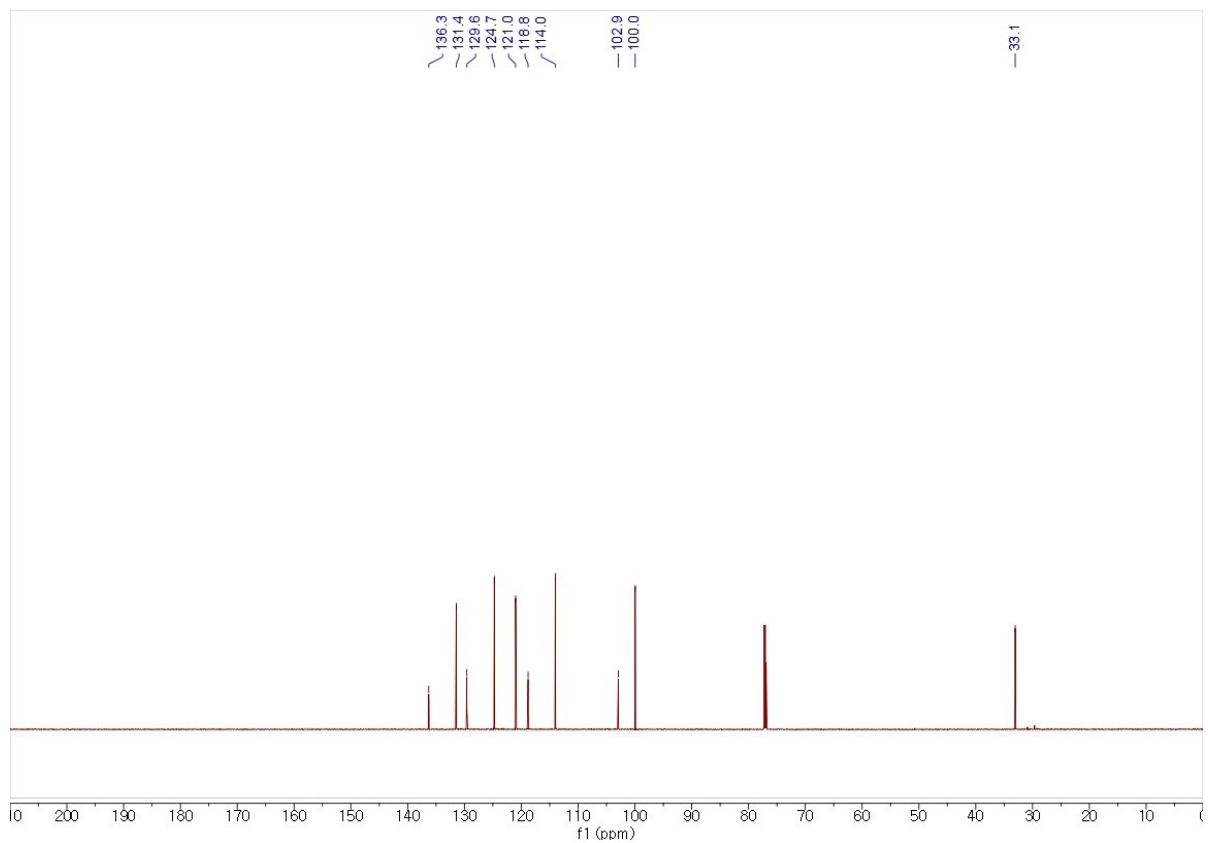

**6-methoxy-1-methyl-1H-indole (5n)**

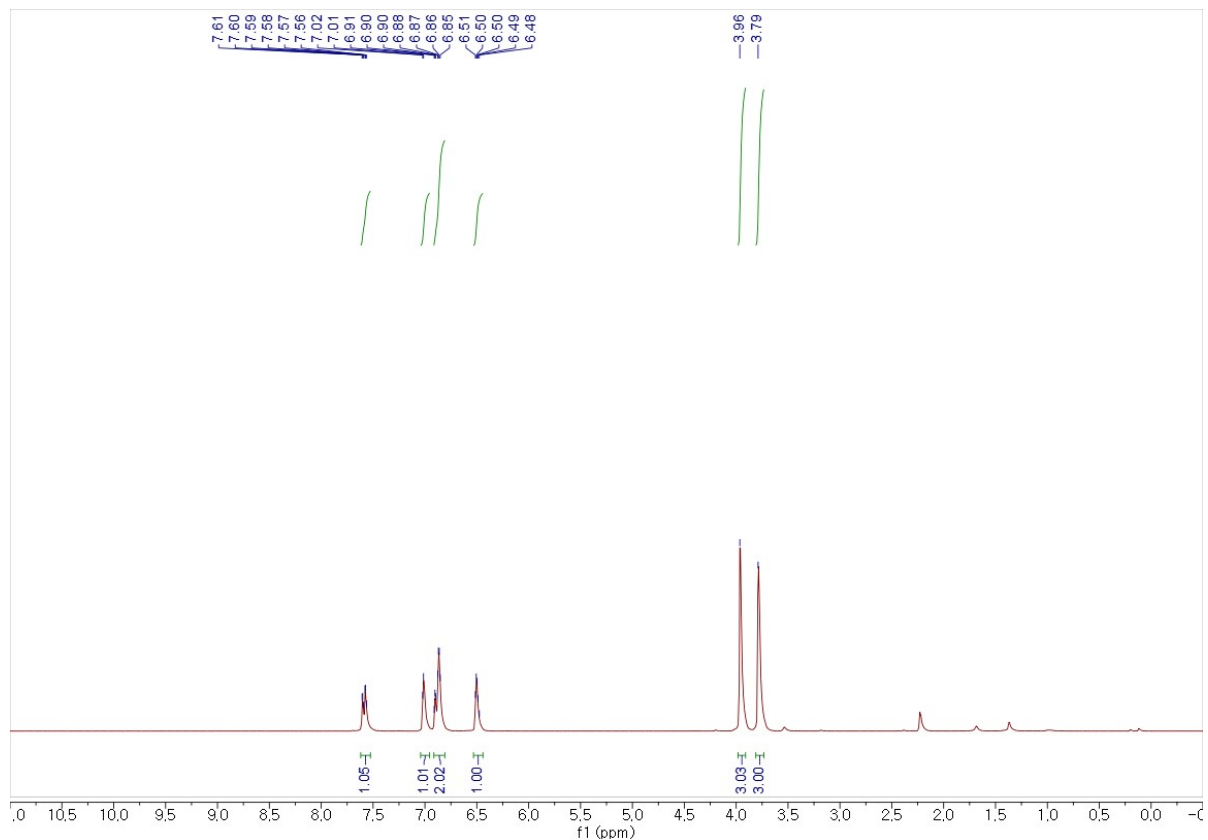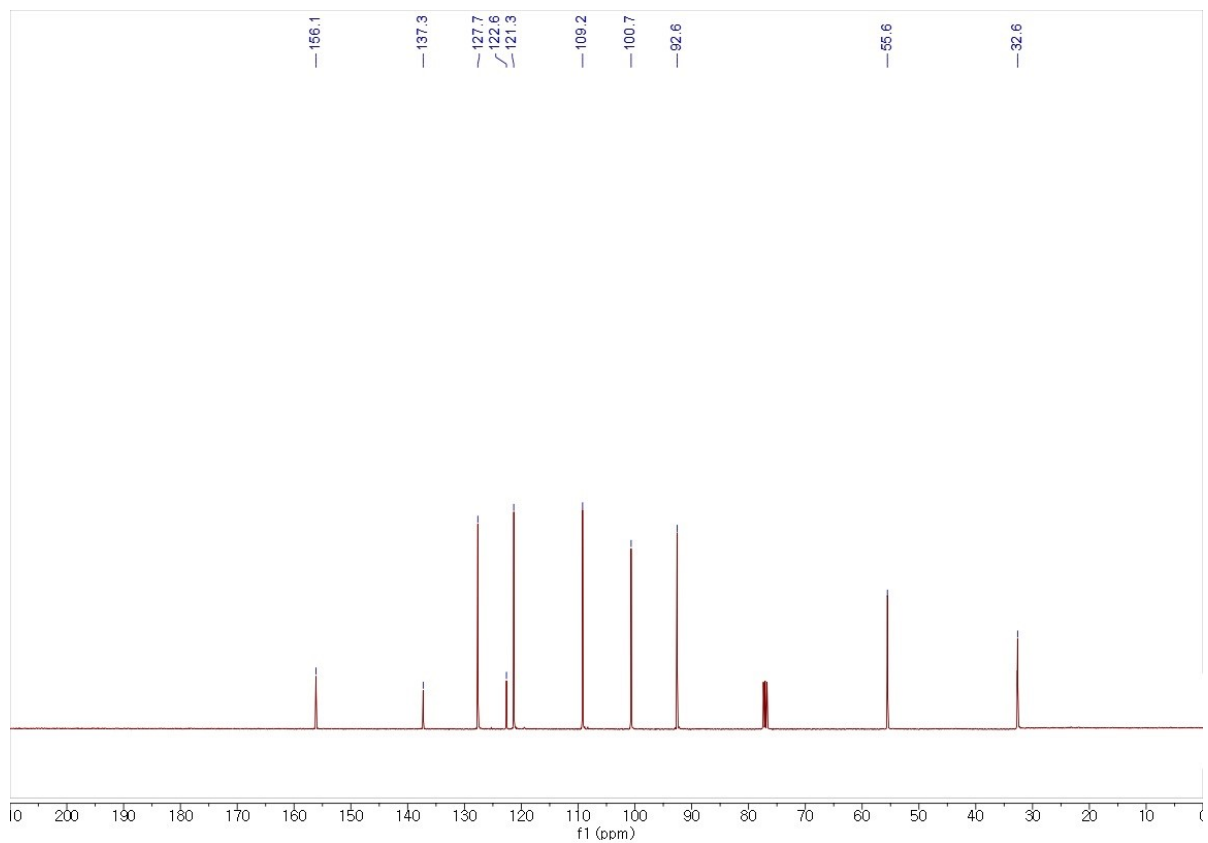

1,6-dimethyl-1*H*-indole (5o)

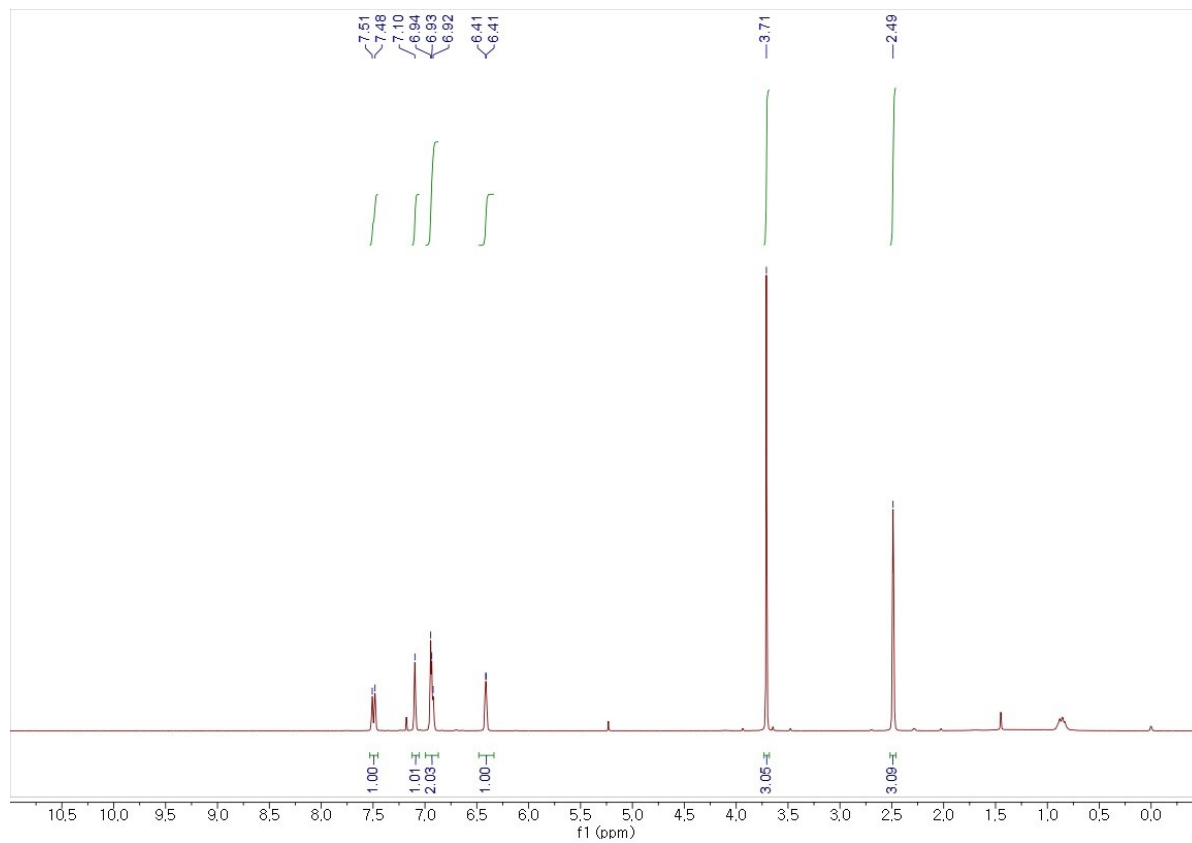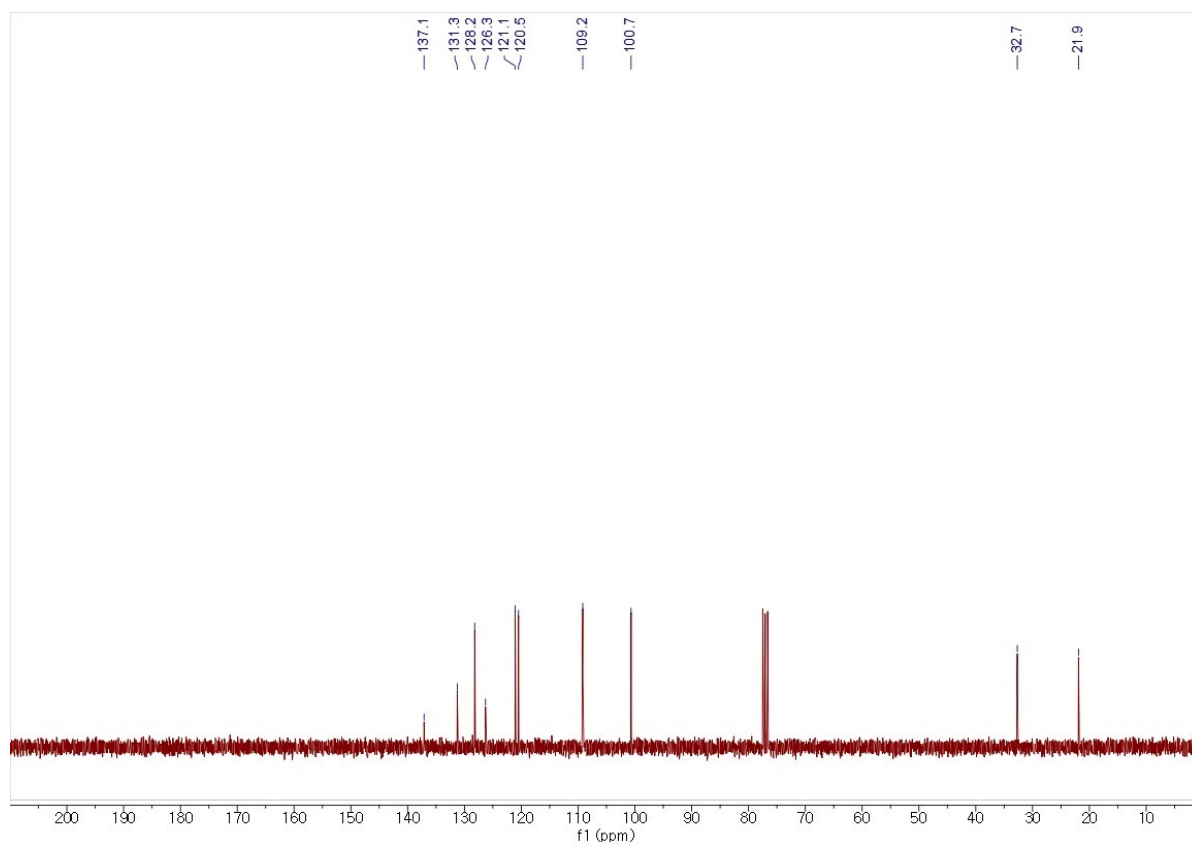

**6-bromo-1-methyl-1*H*-indole (5p)**

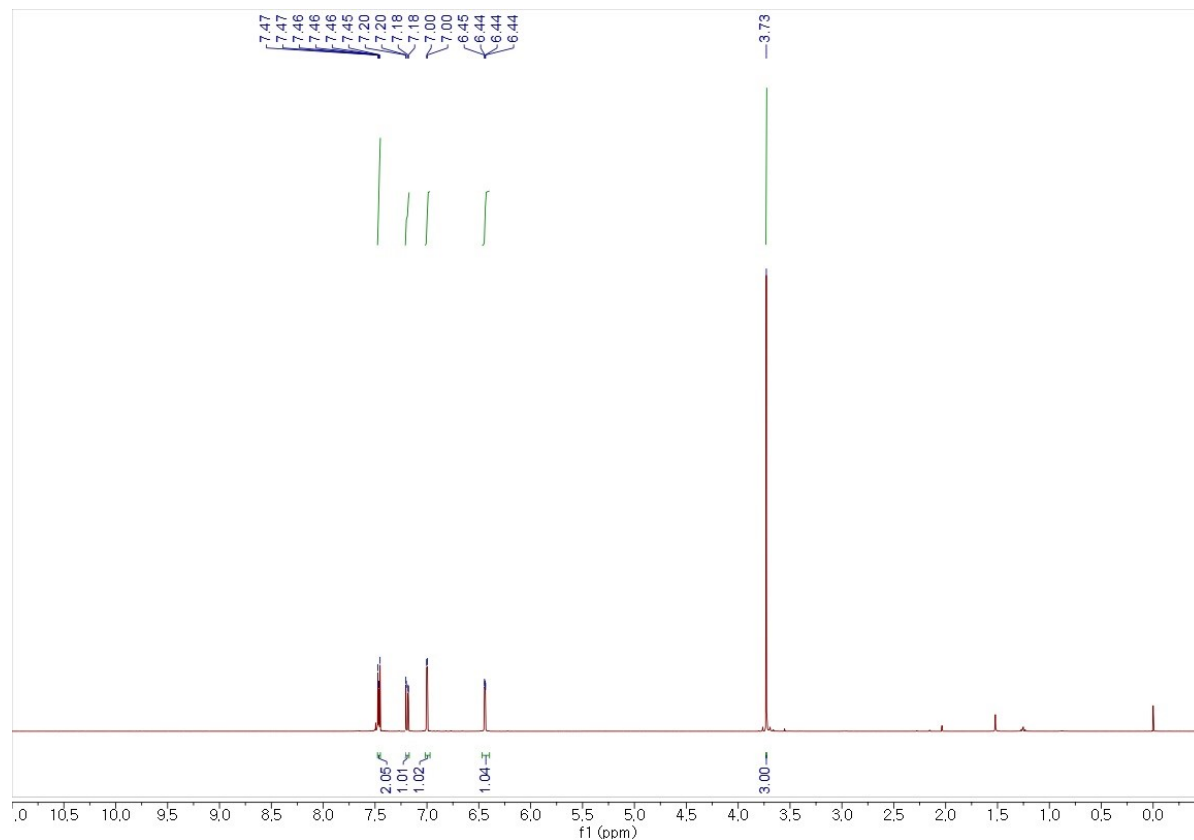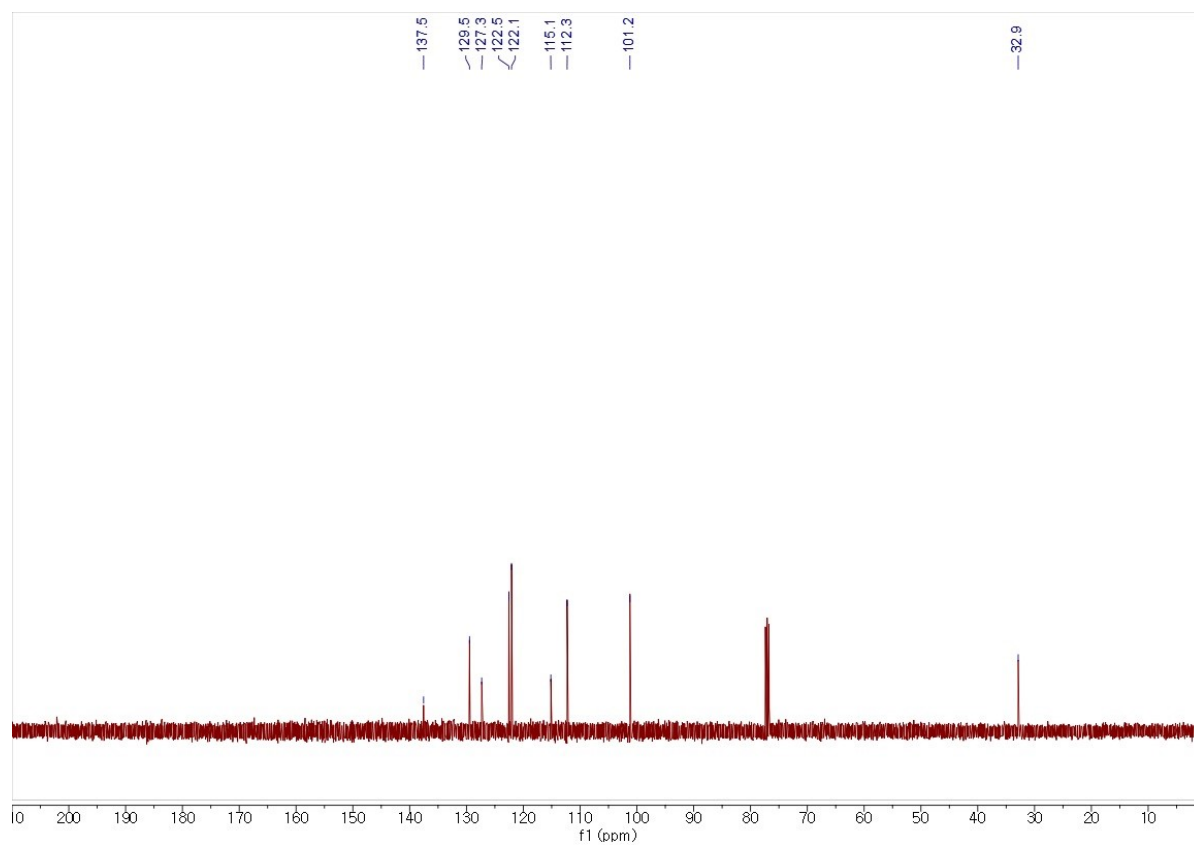

**6-chloro-1-methyl-1*H*-indole (5q)**

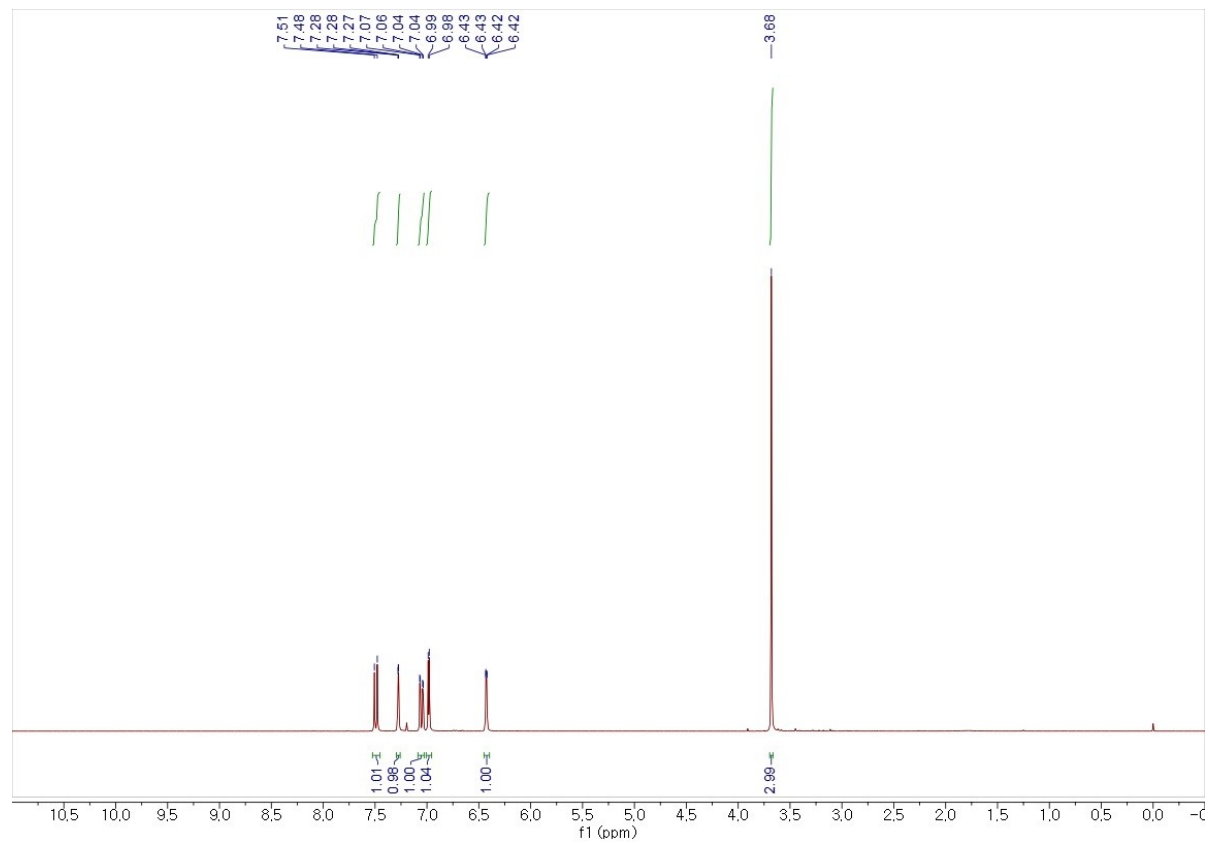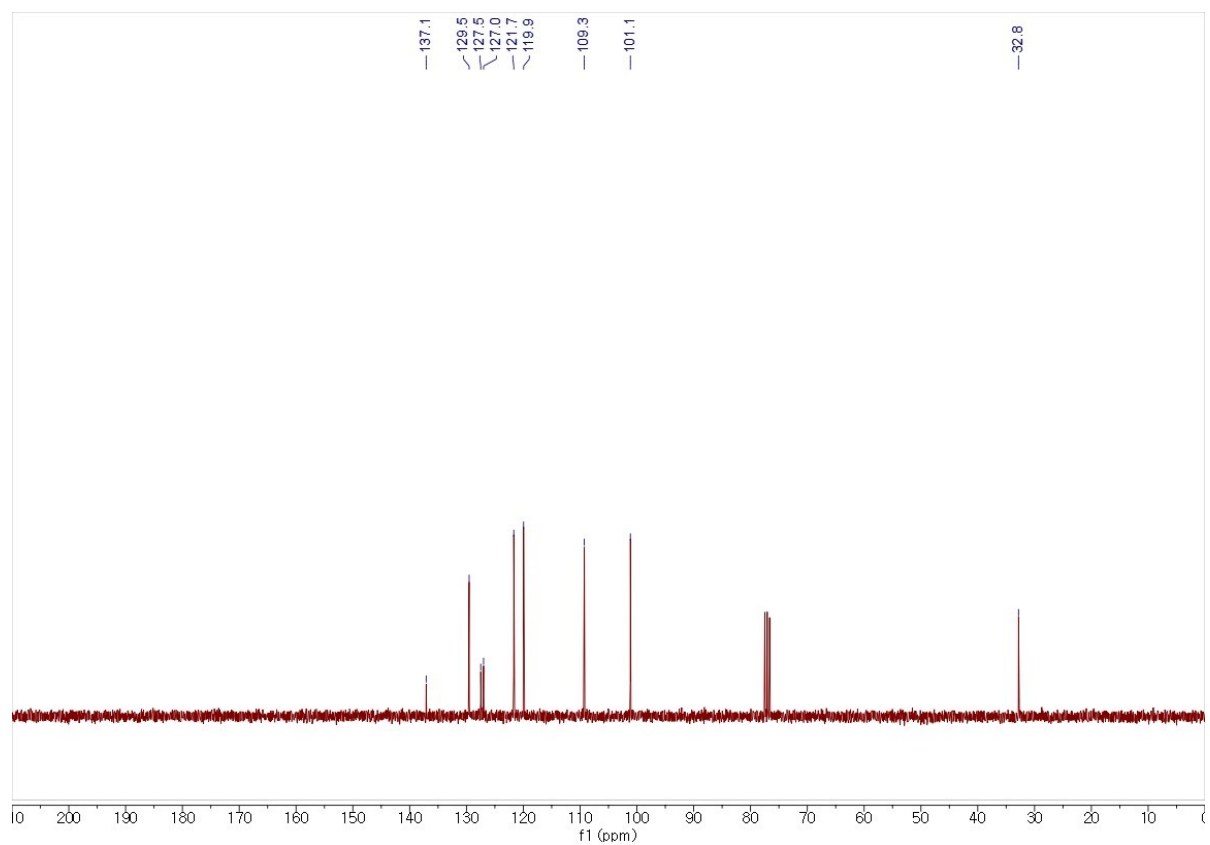

**7-bromo-1-methyl-1H-indole (5r)**

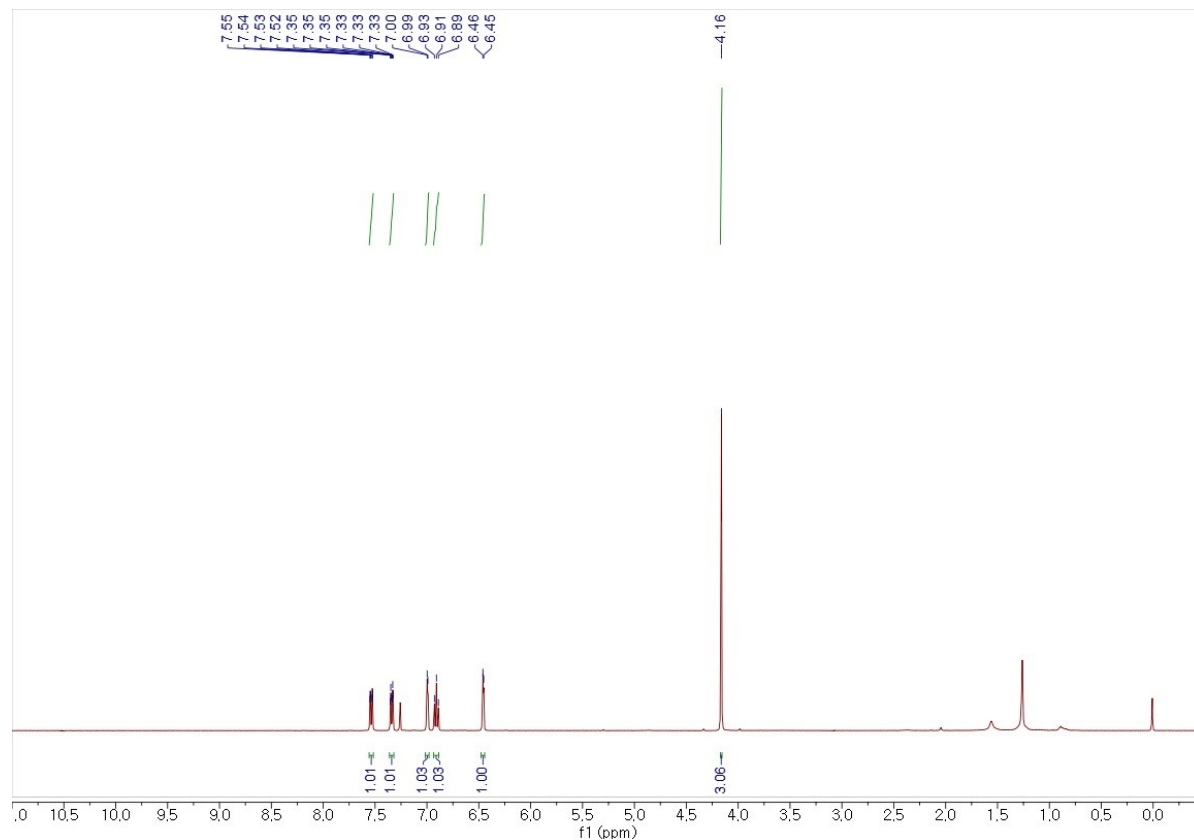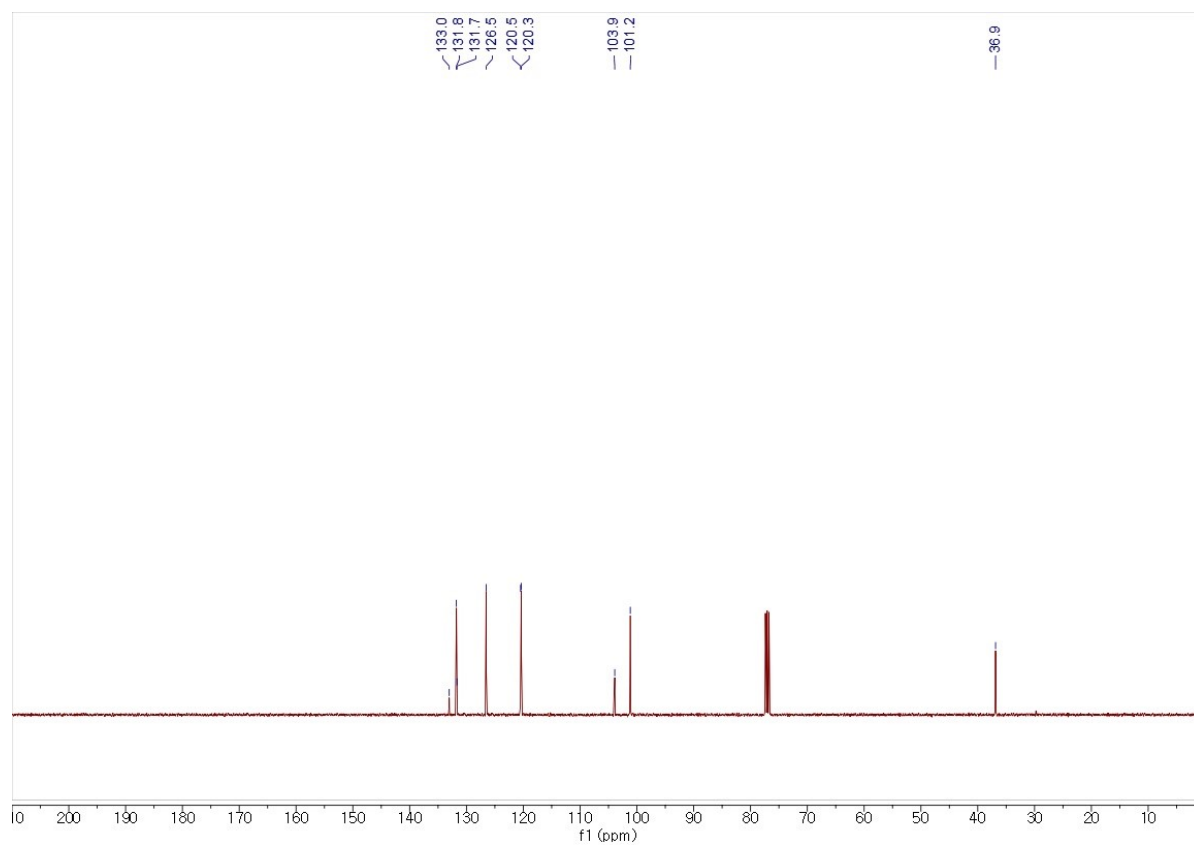

**7-chloro-1-methyl-1*H*-indole (5s)**

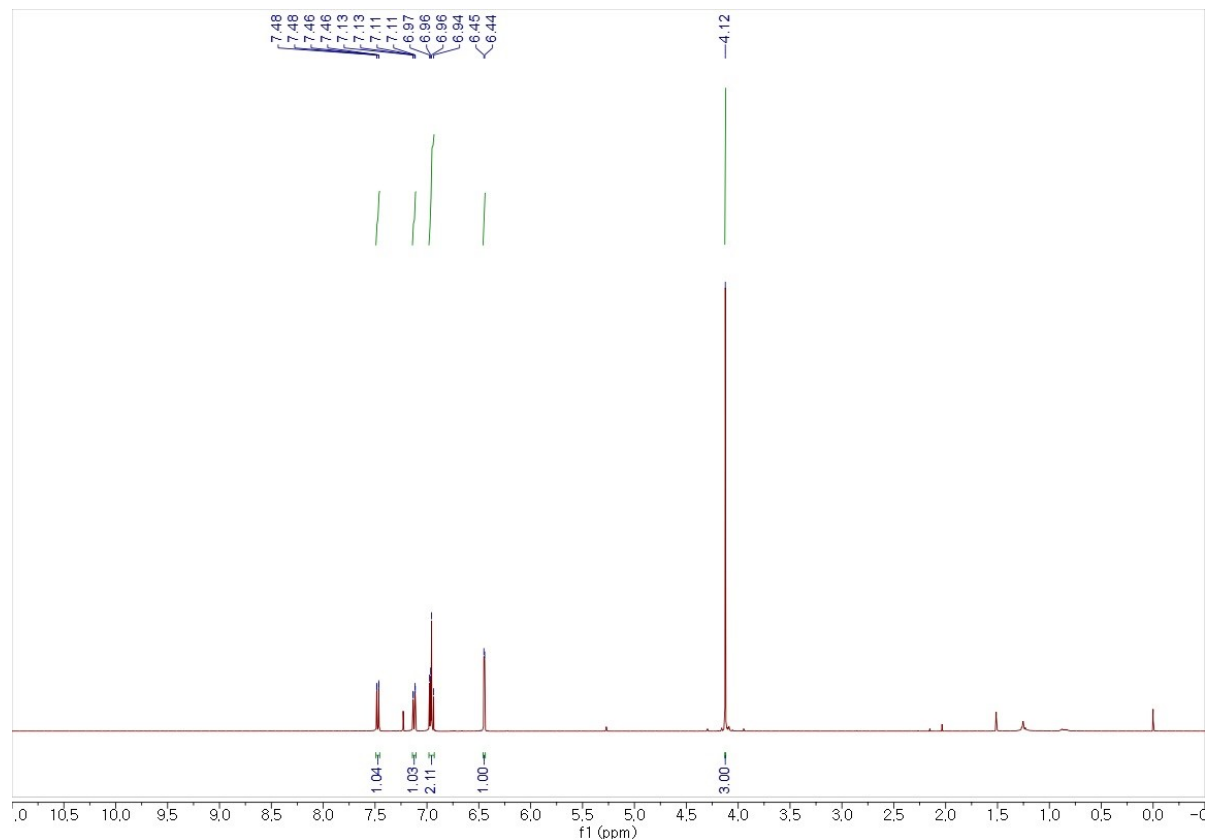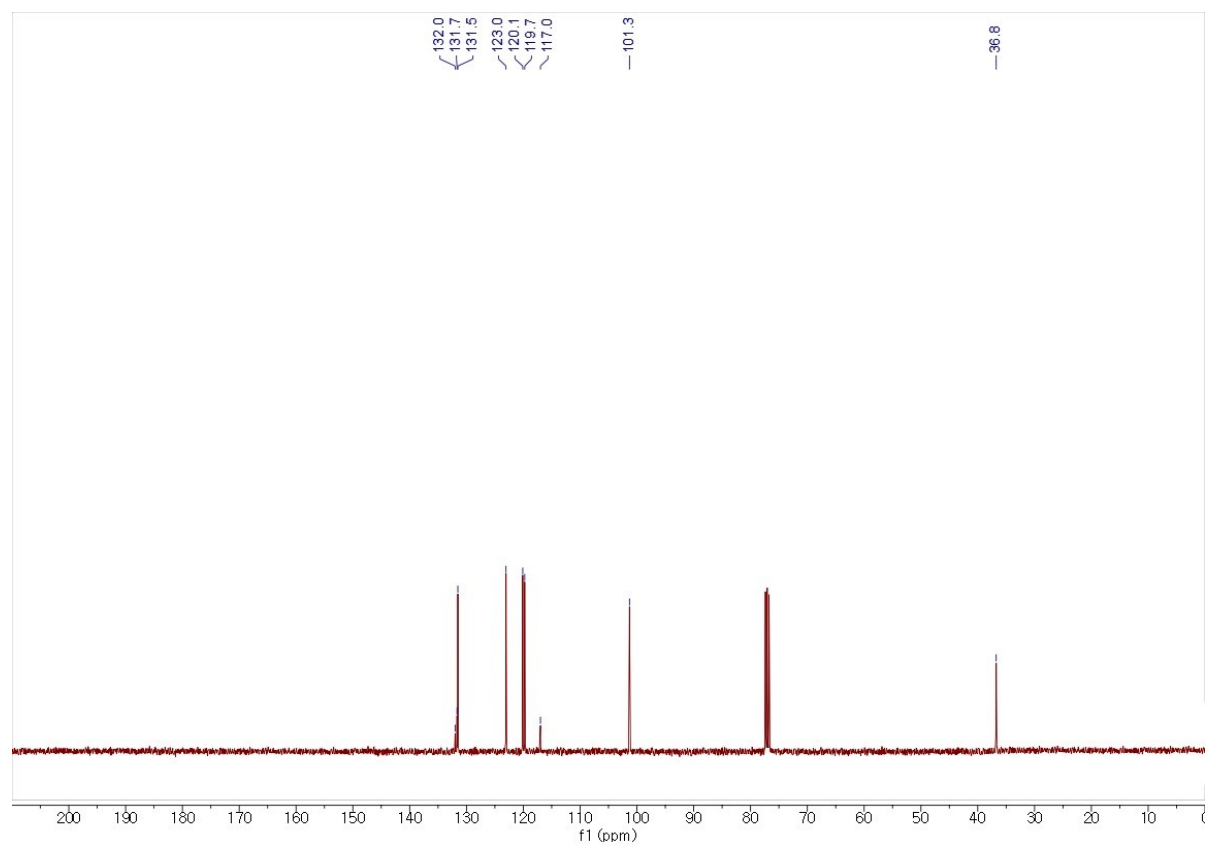



### 1,7-dimethyl-1*H*-indole (5t)

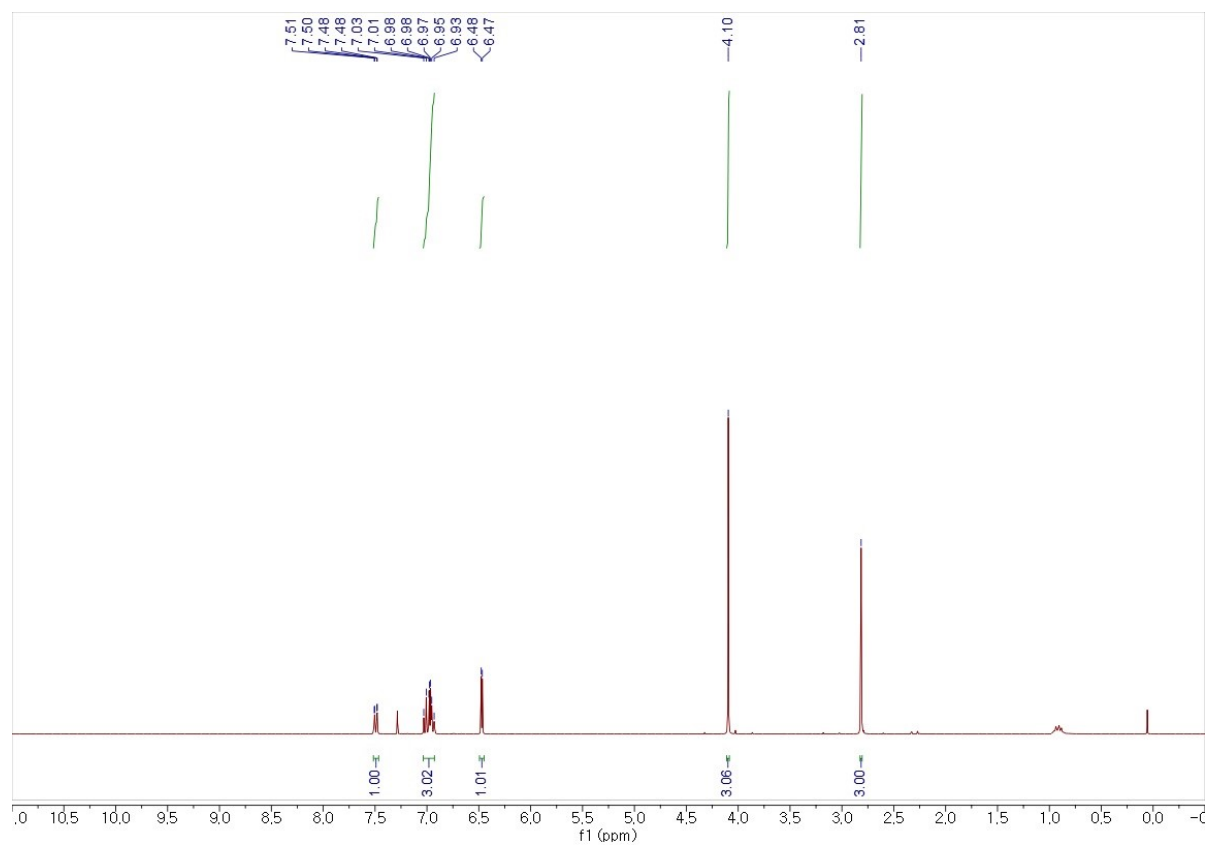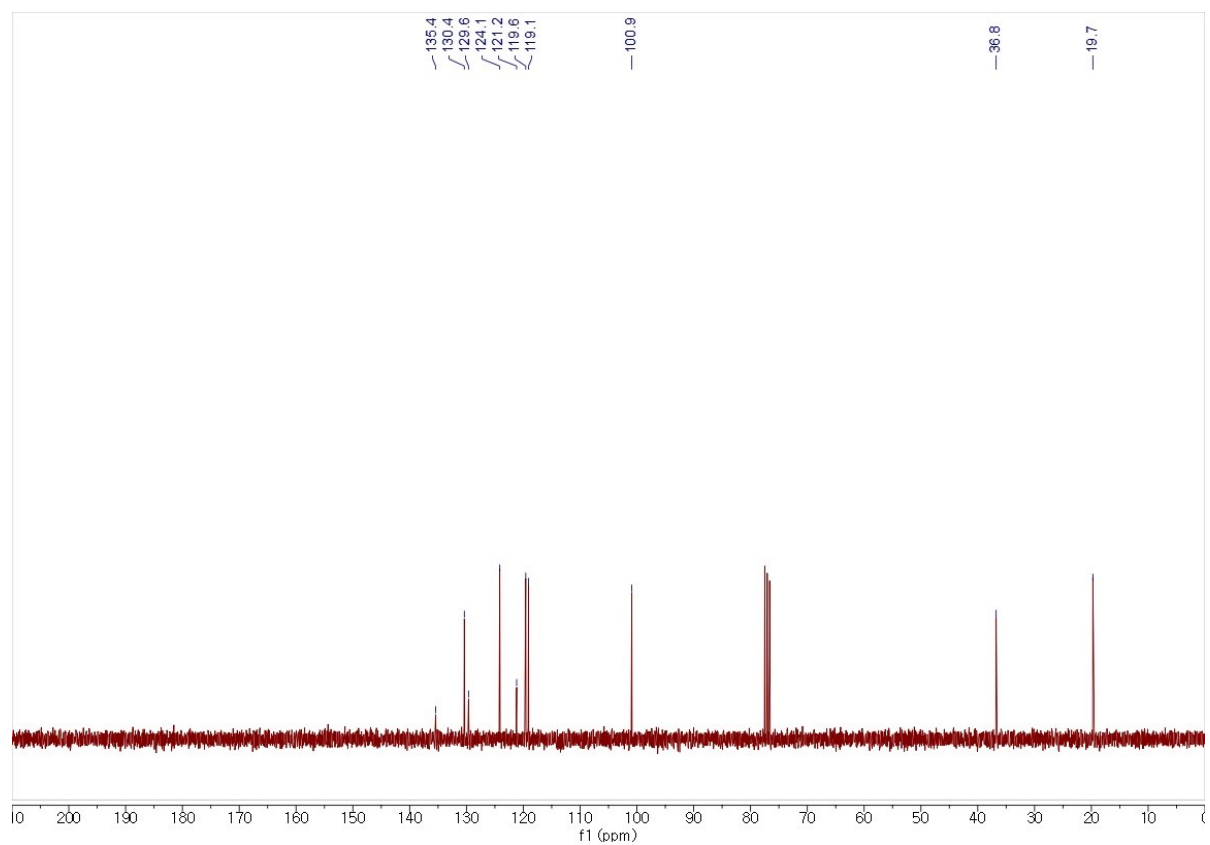

1,3-dimethyl-1H-indole (5u)

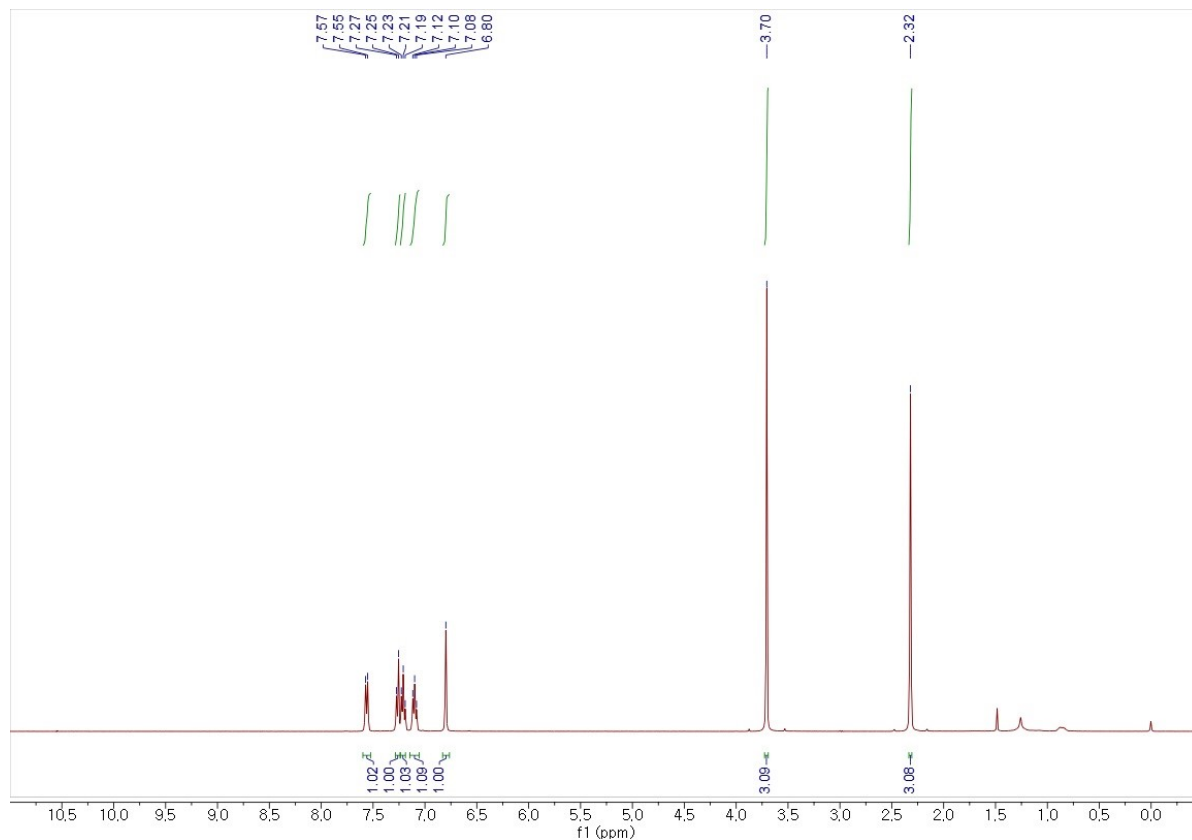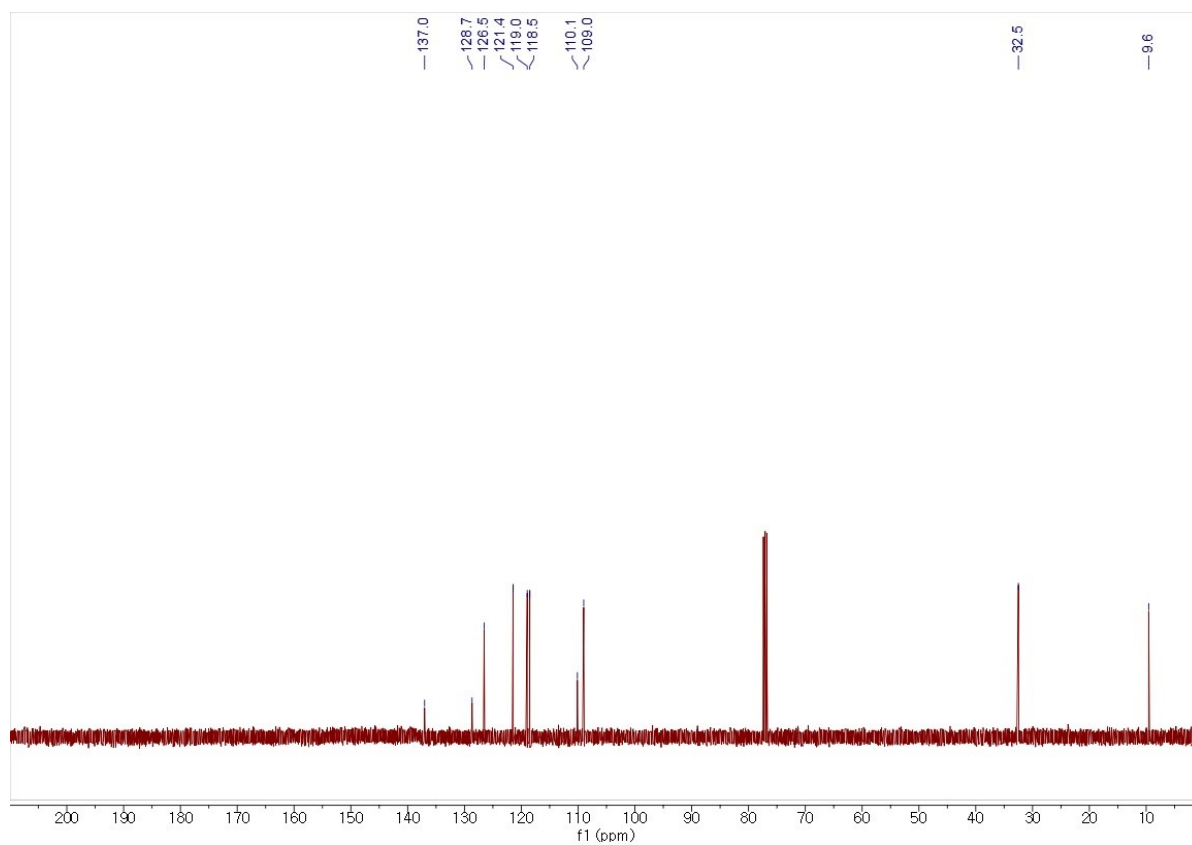

1,2-dimethyl-1H-indole (5v)

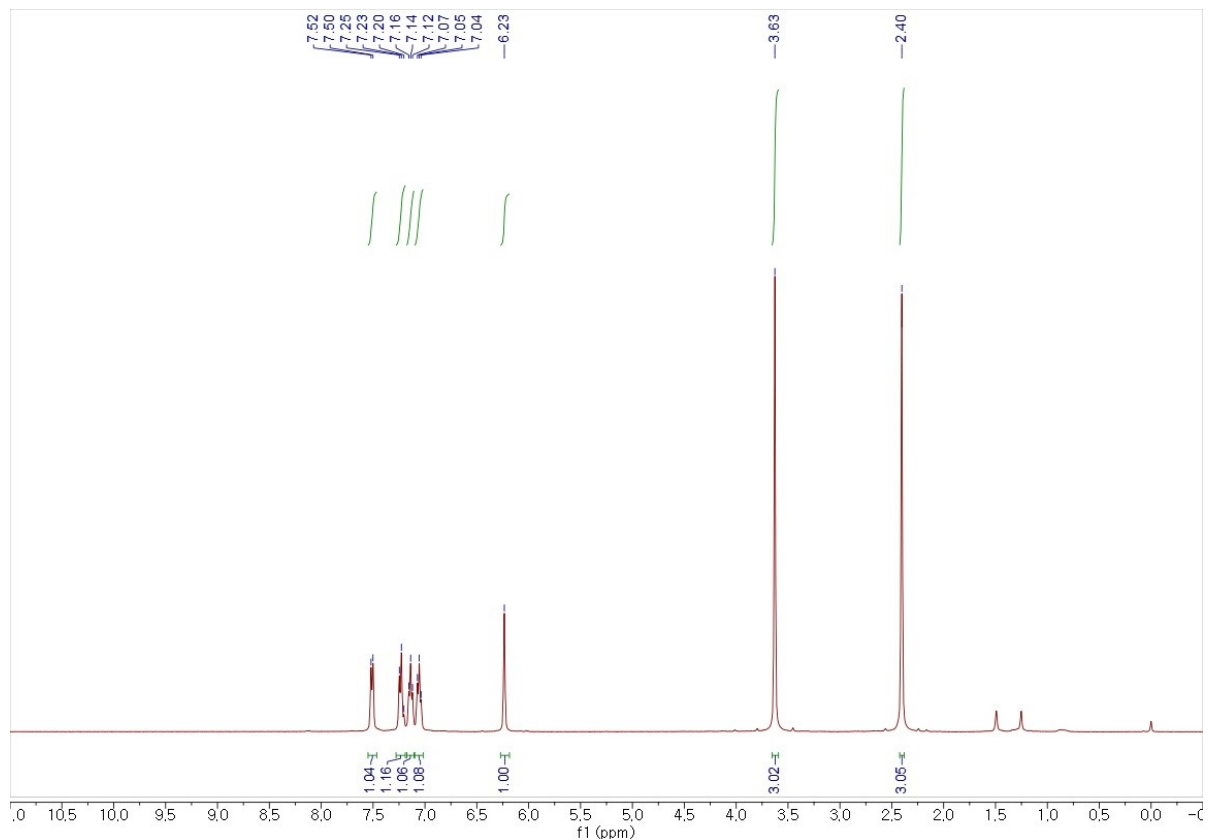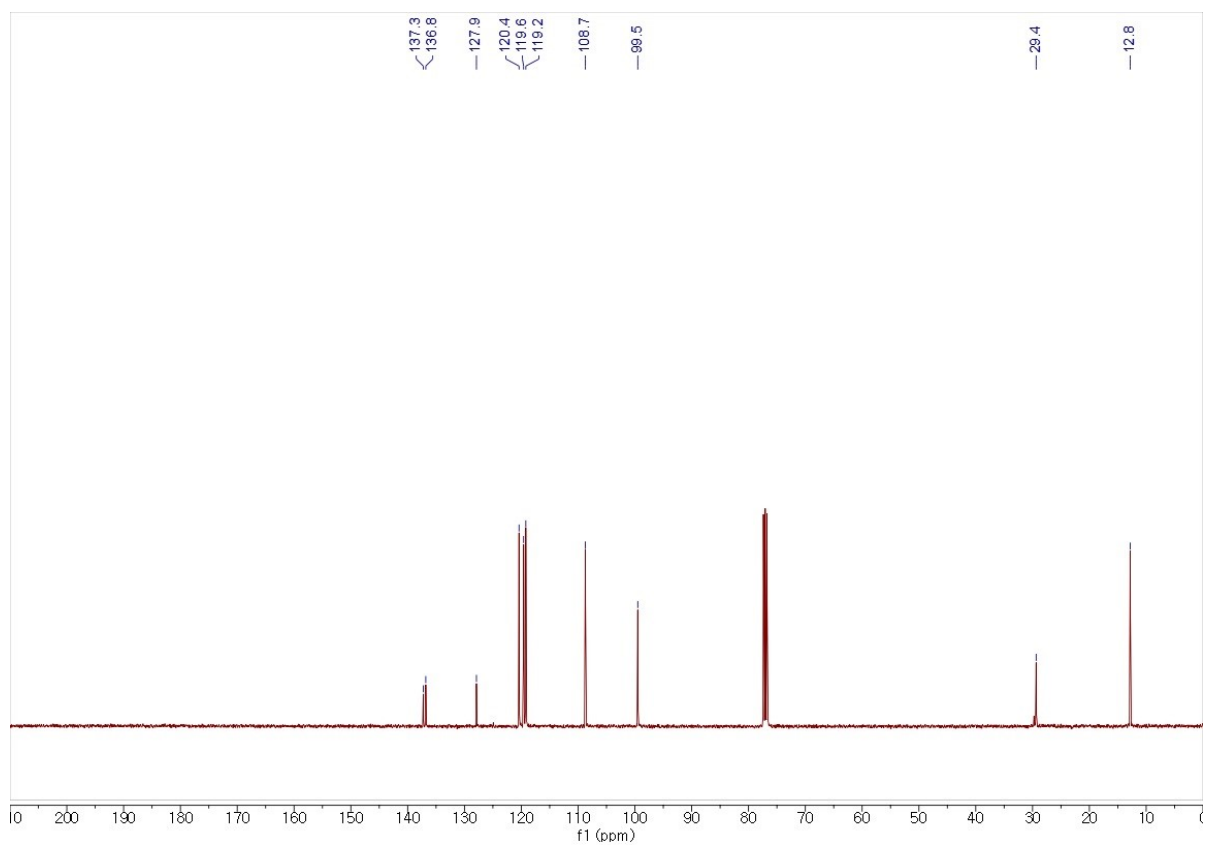

1-ethyl-1*H*-indole (5w)

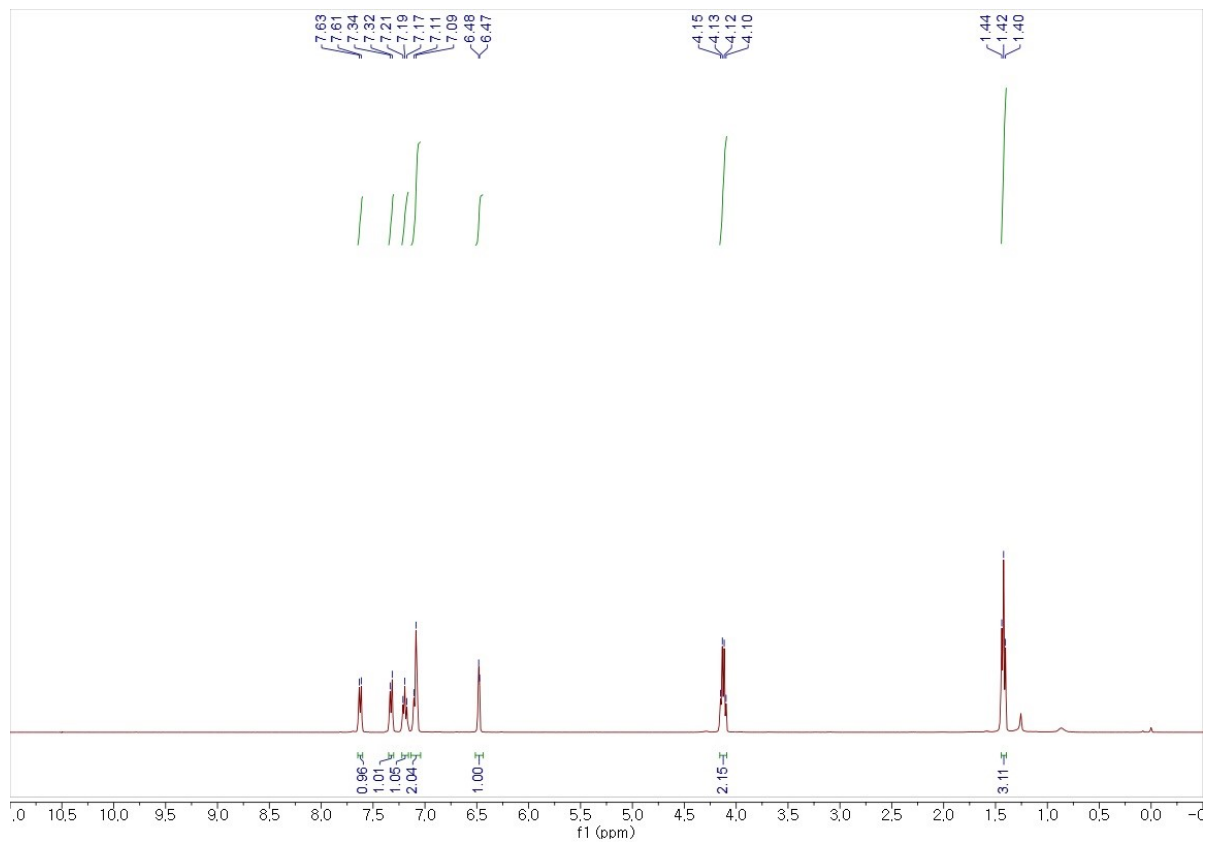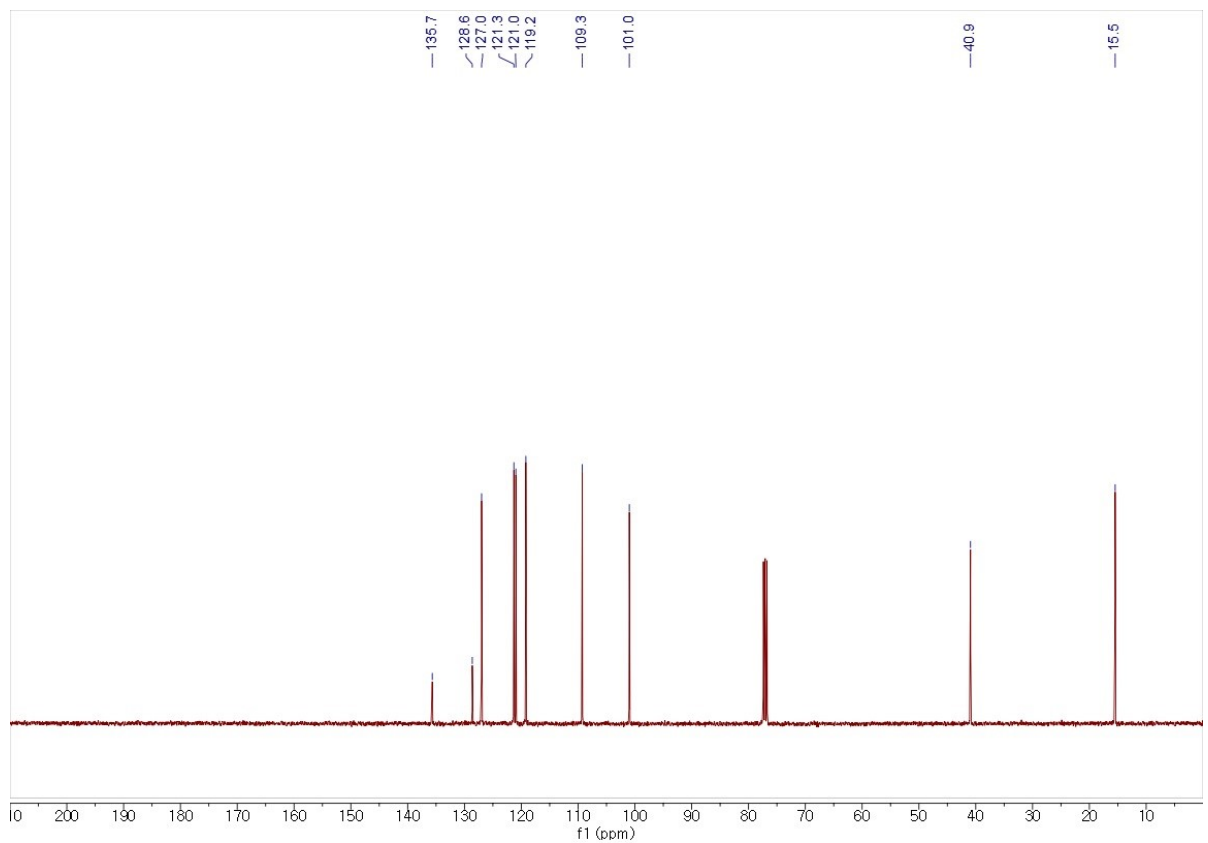

**1-benzyl-1*H*-indole (5x)**

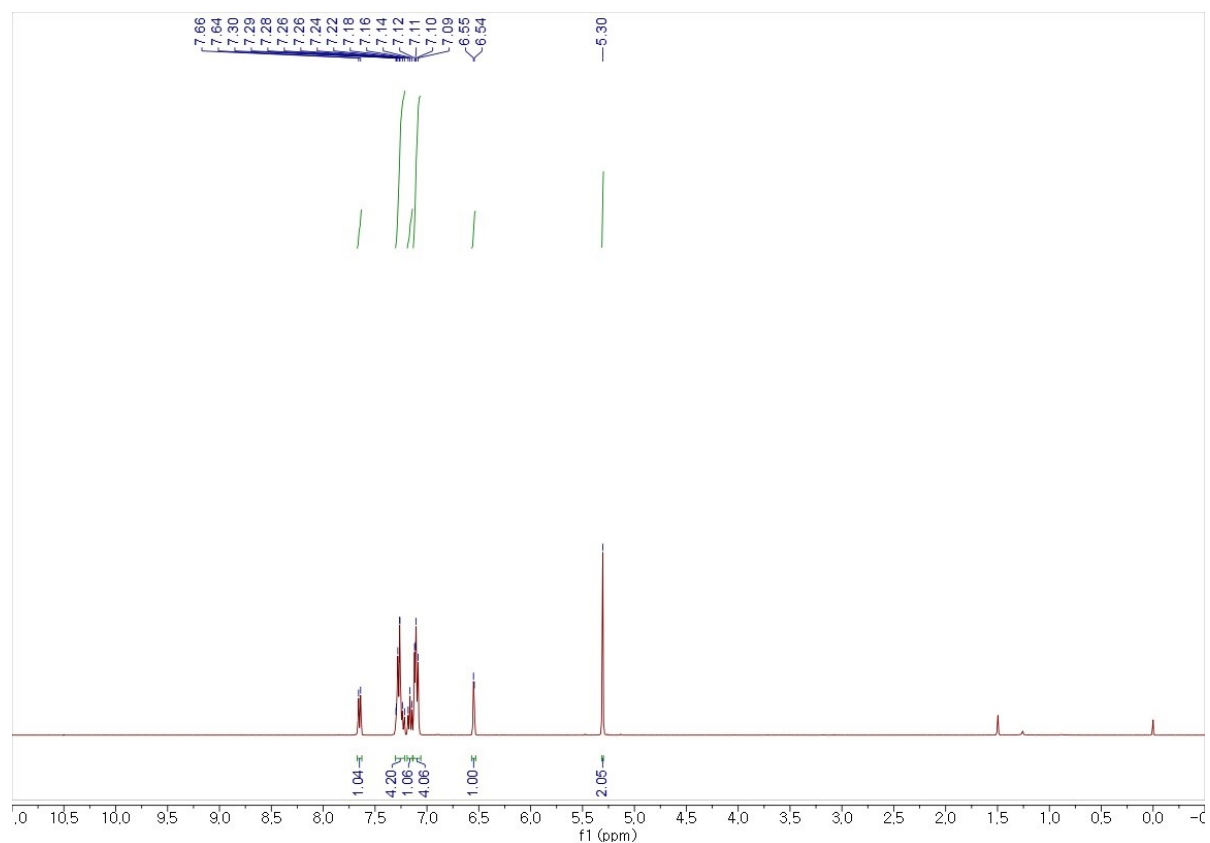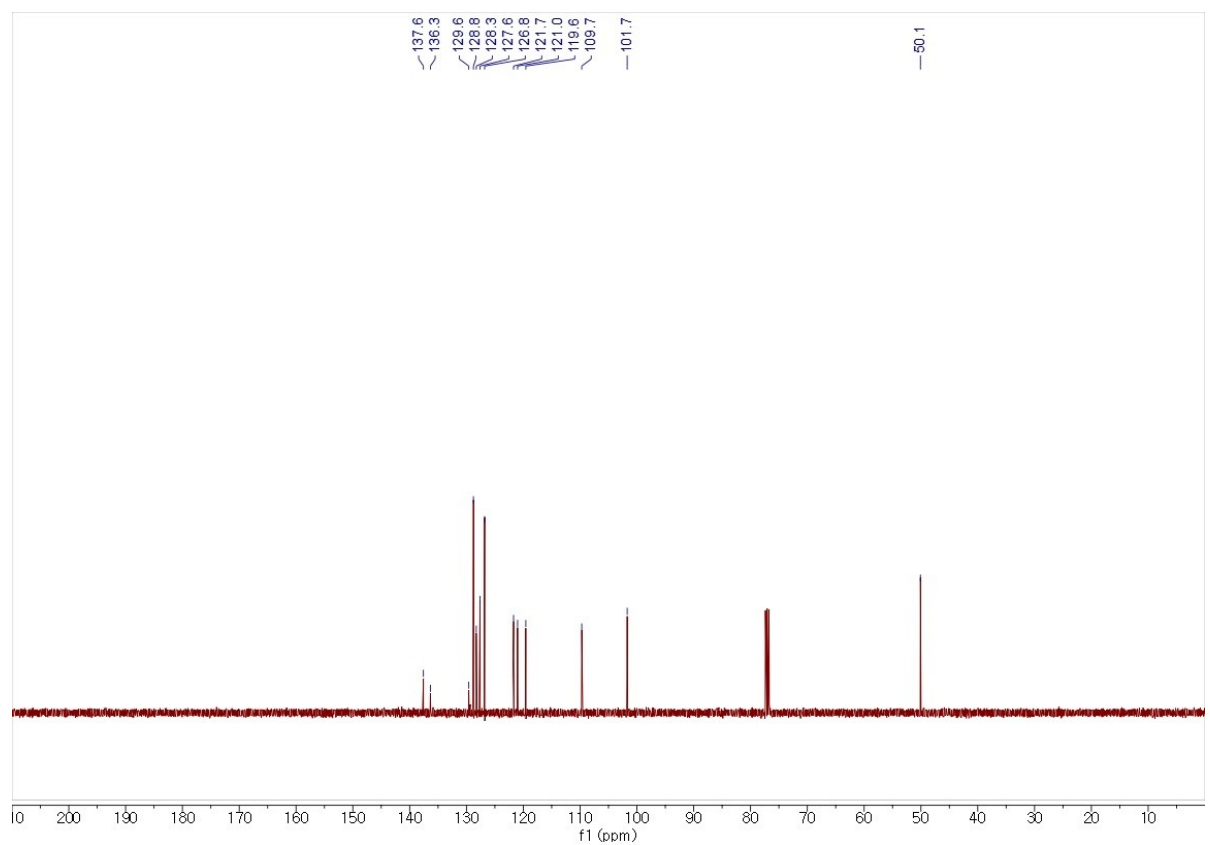

# 1-allyl-1H-indole (5y)

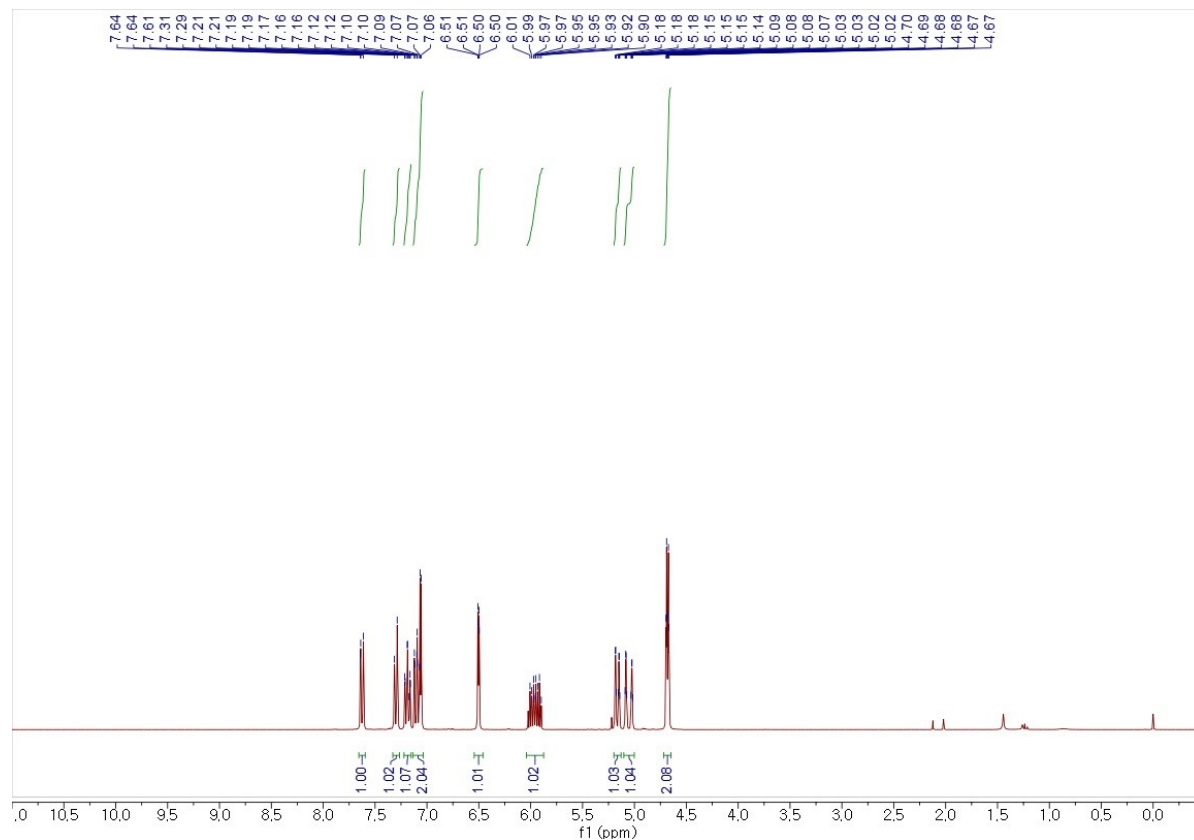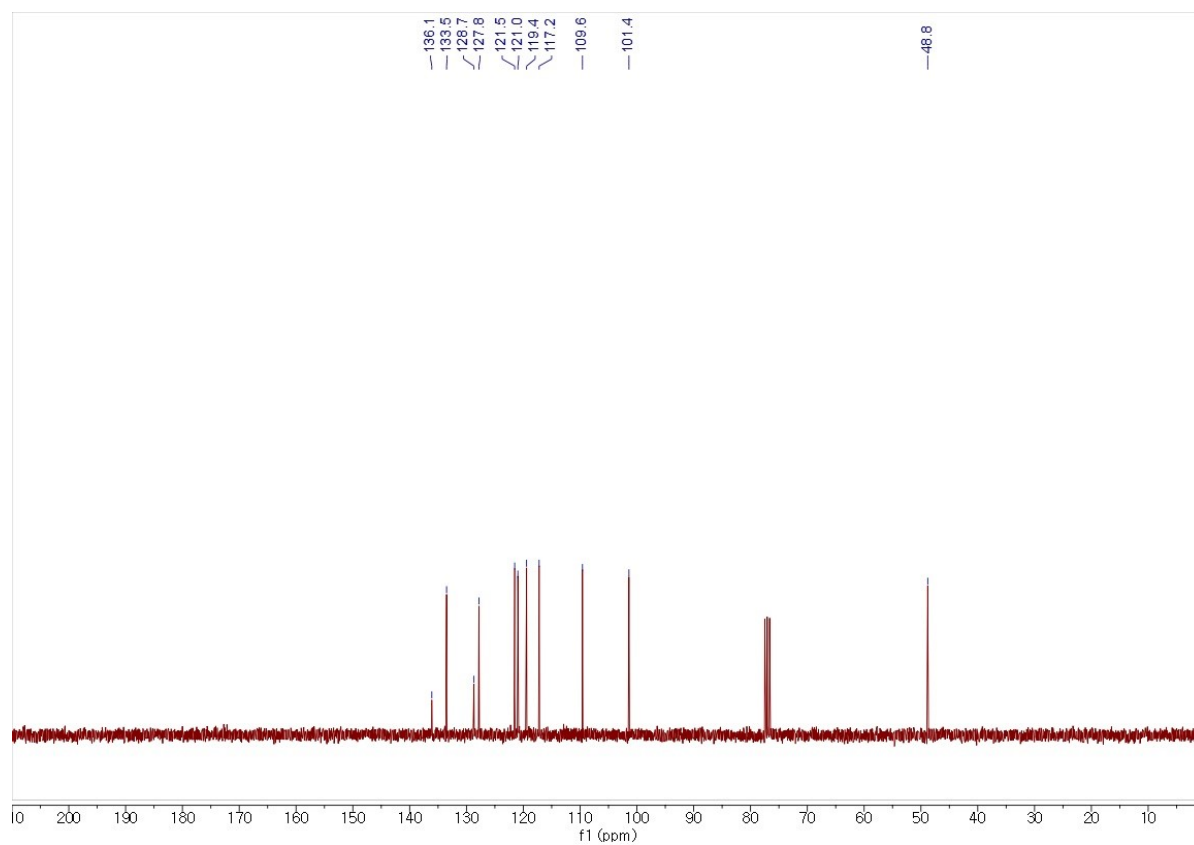

# 1-phenyl-1H-indole (5z)

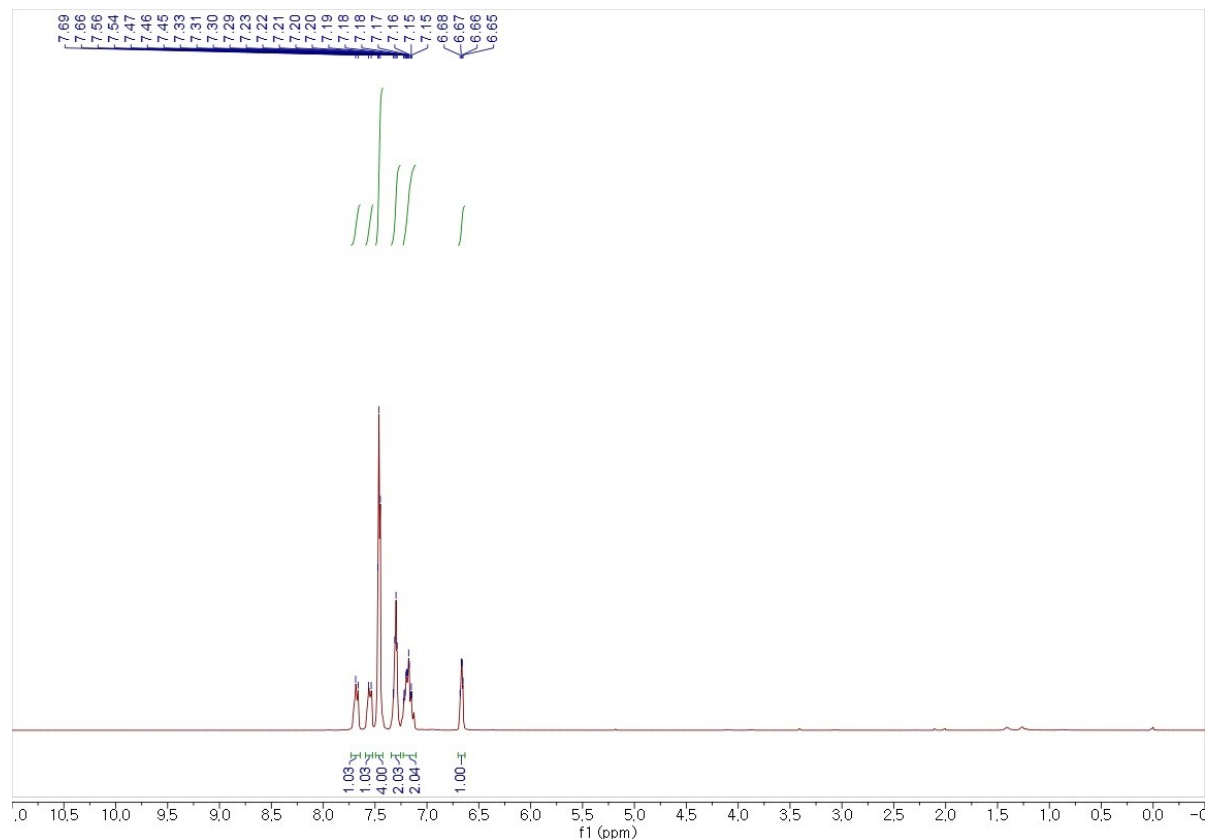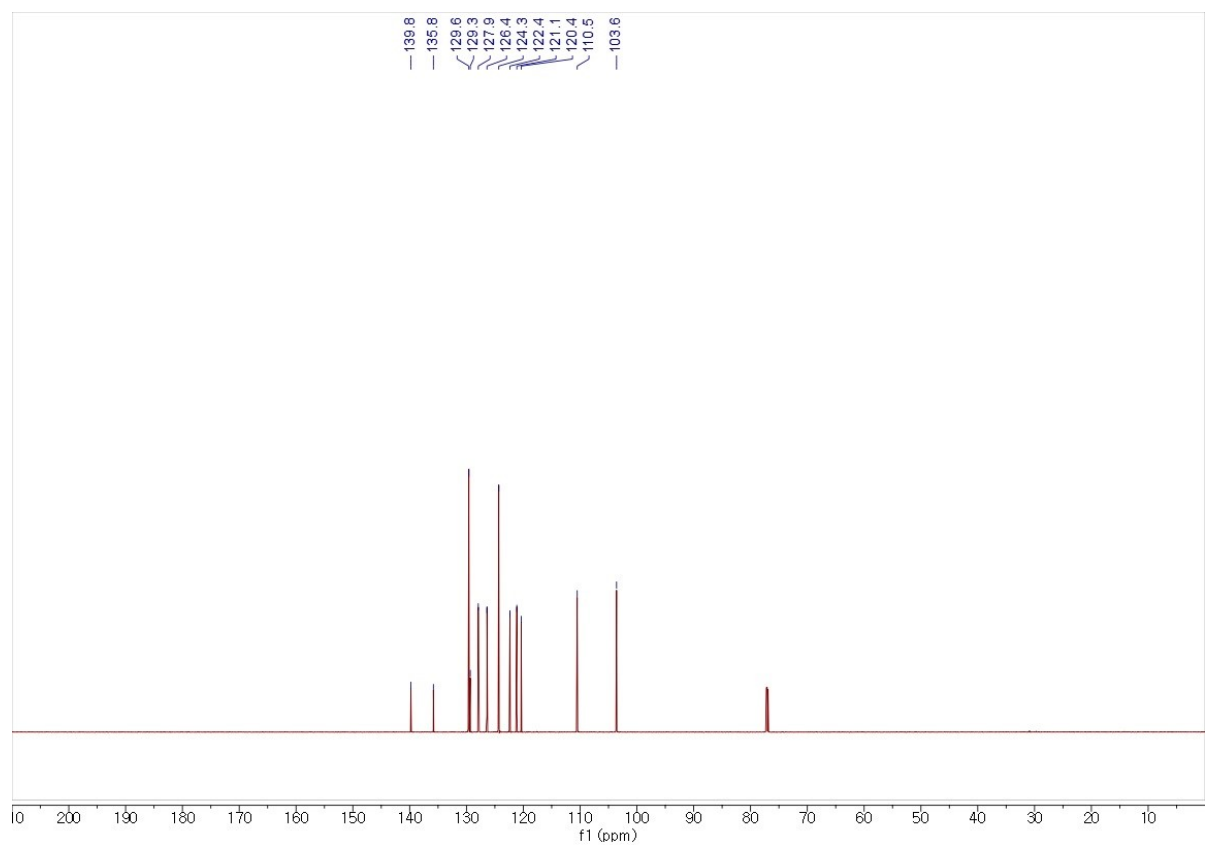

**1-(*p*-tolyl)-1*H*-indole (5aa)**

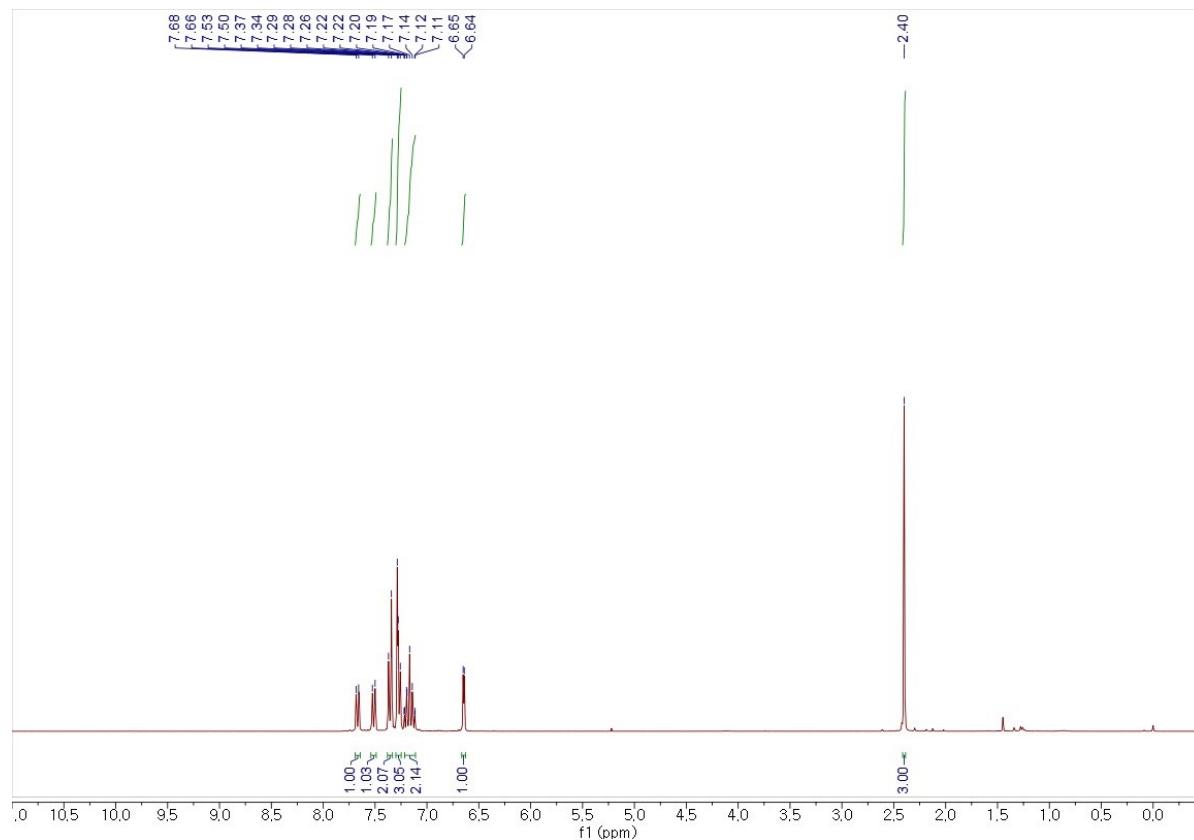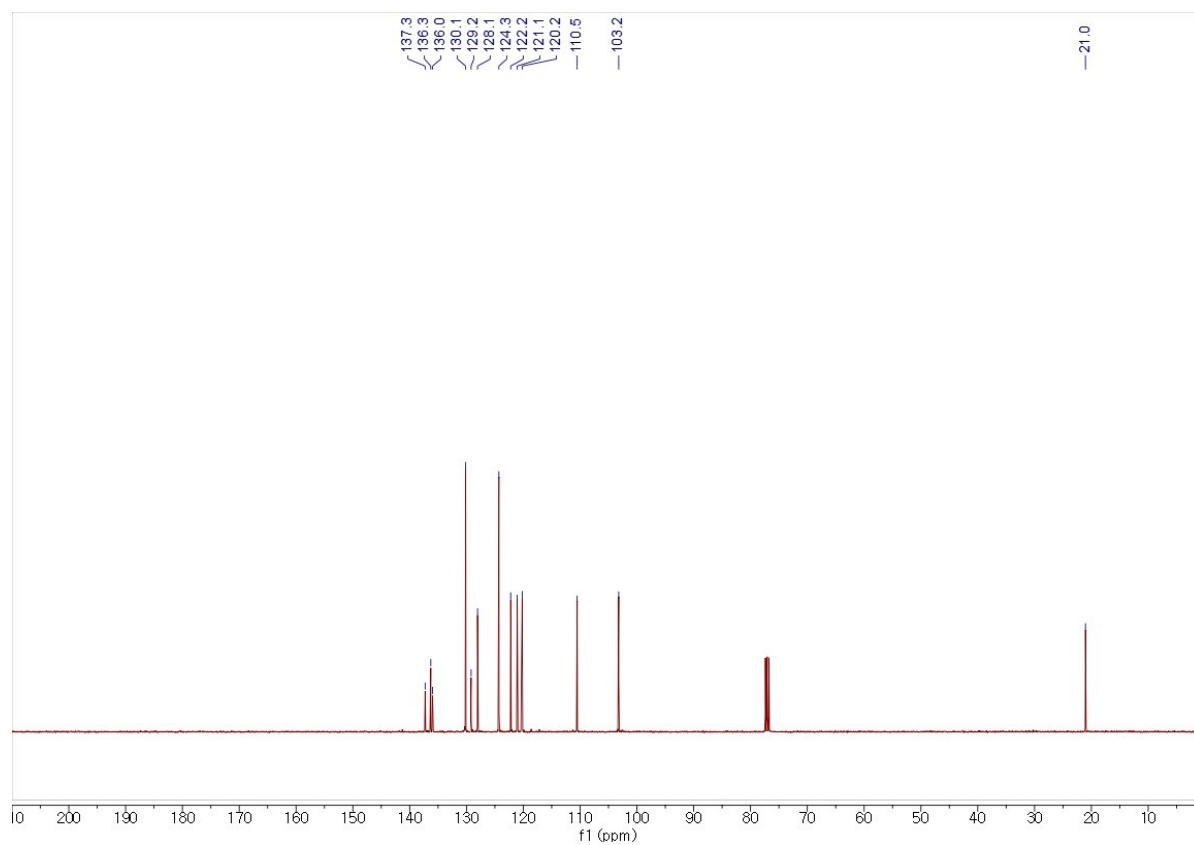



### 1-(4-bromophenyl)-1H-indole (5ab)

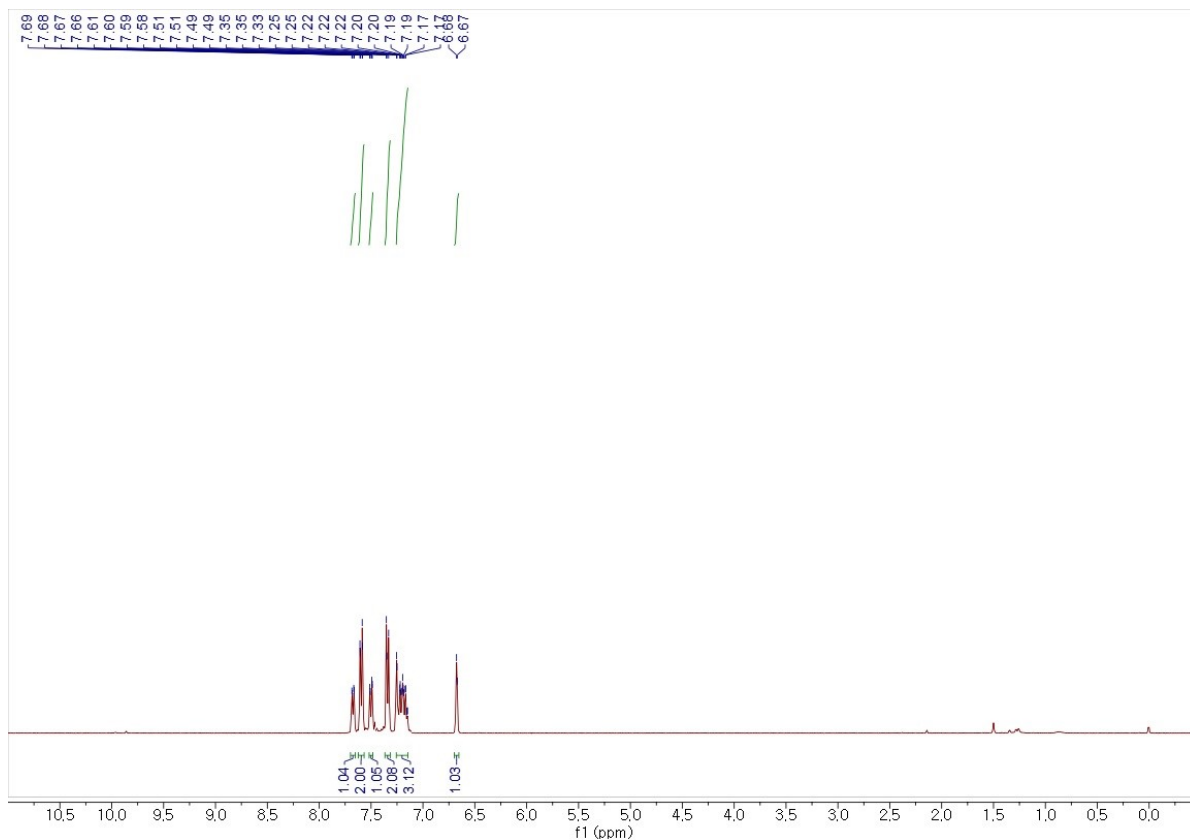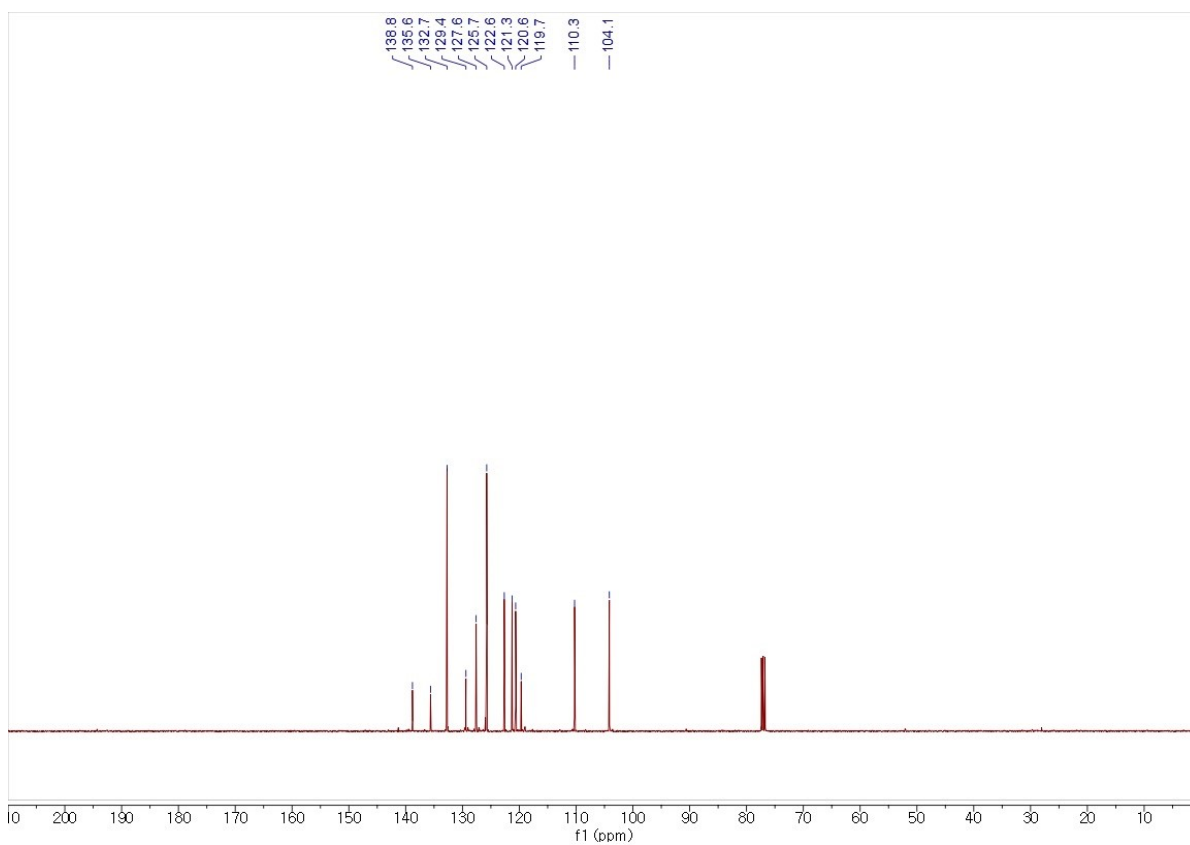

### 1-(4-nitrophenyl)-1*H*-indole (5ac)

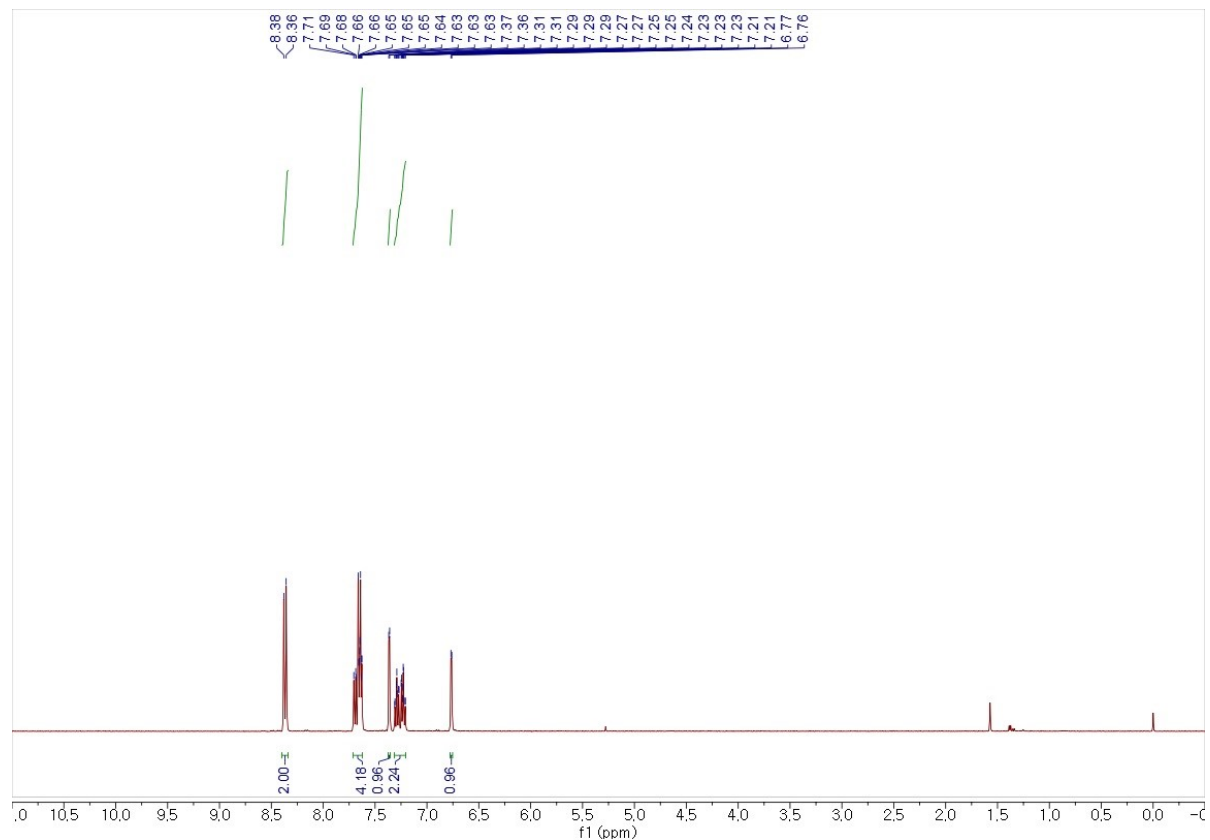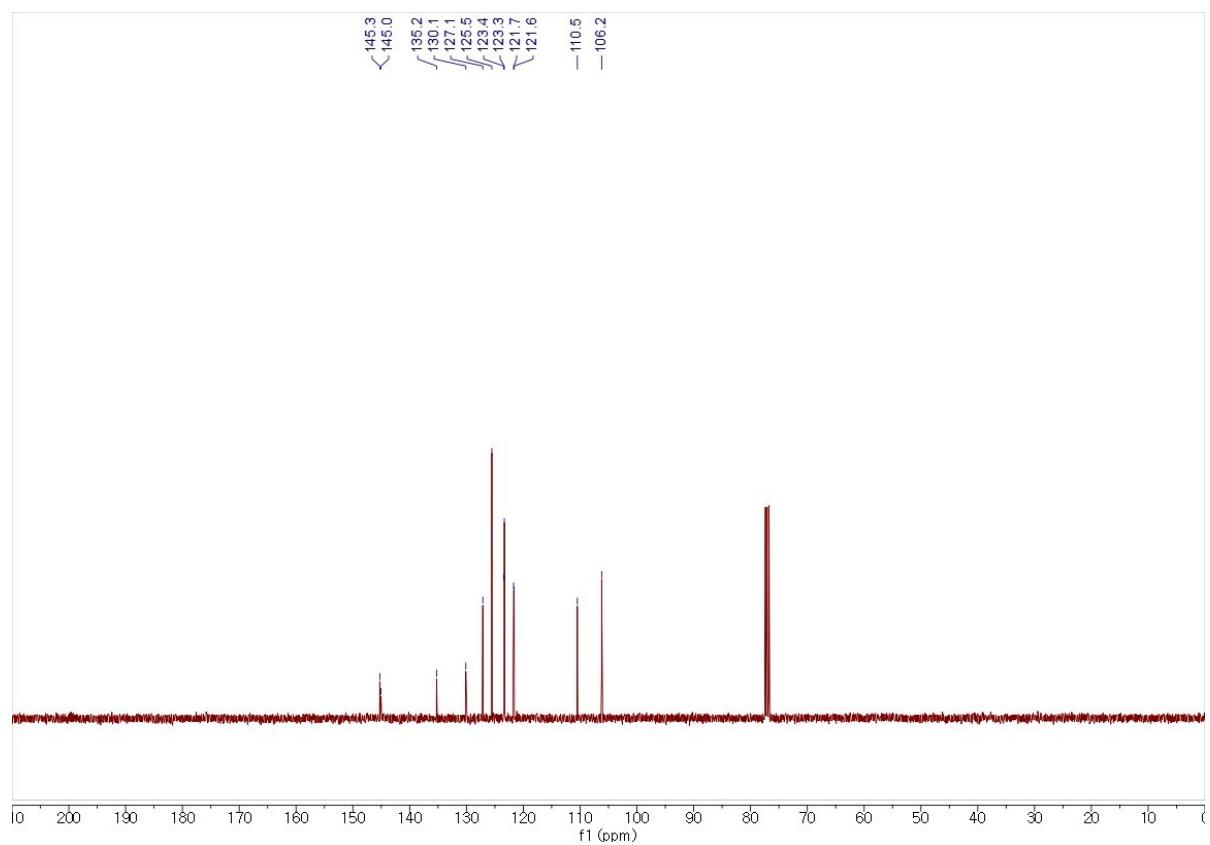

1,2-di(1*H*-indol-1-yl)ethane (5af)

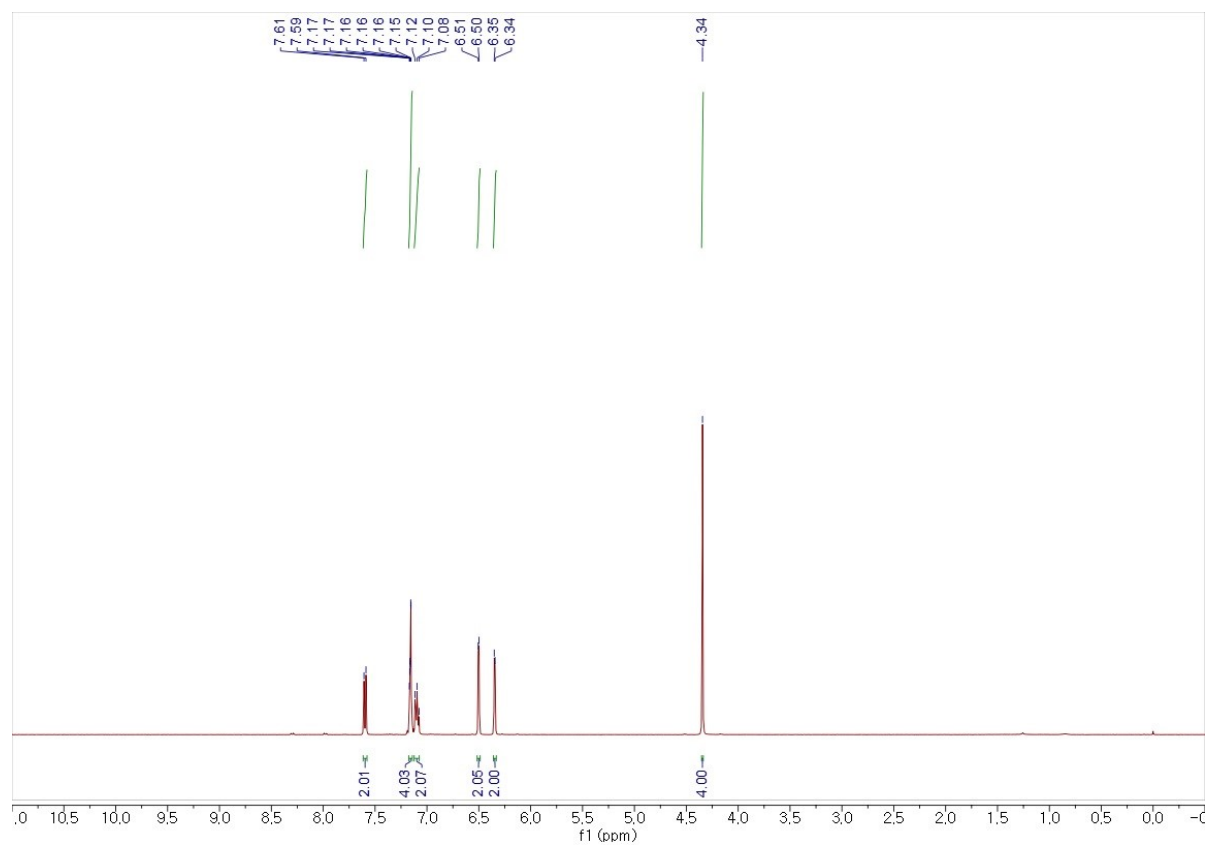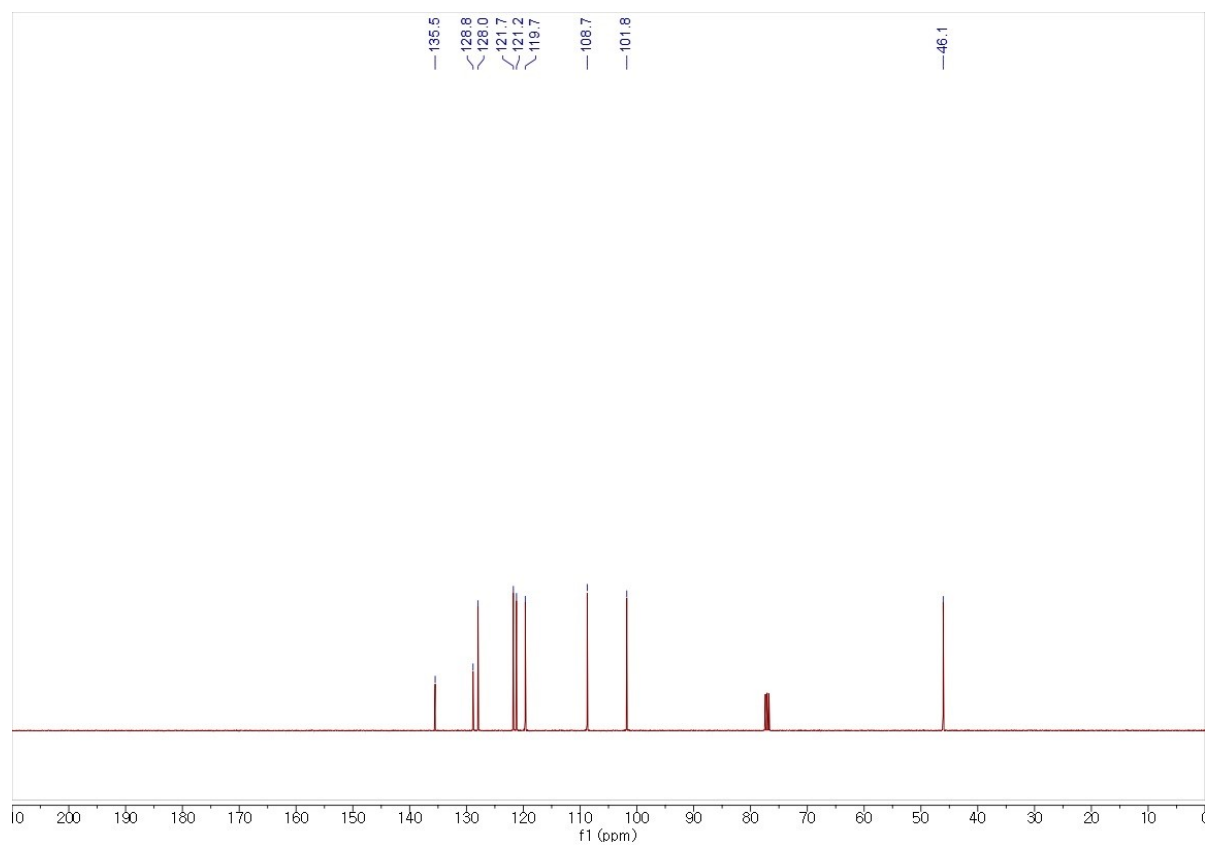

# 1-(3-chloro-1-phenylpropyl)-1H-indole (5ag)

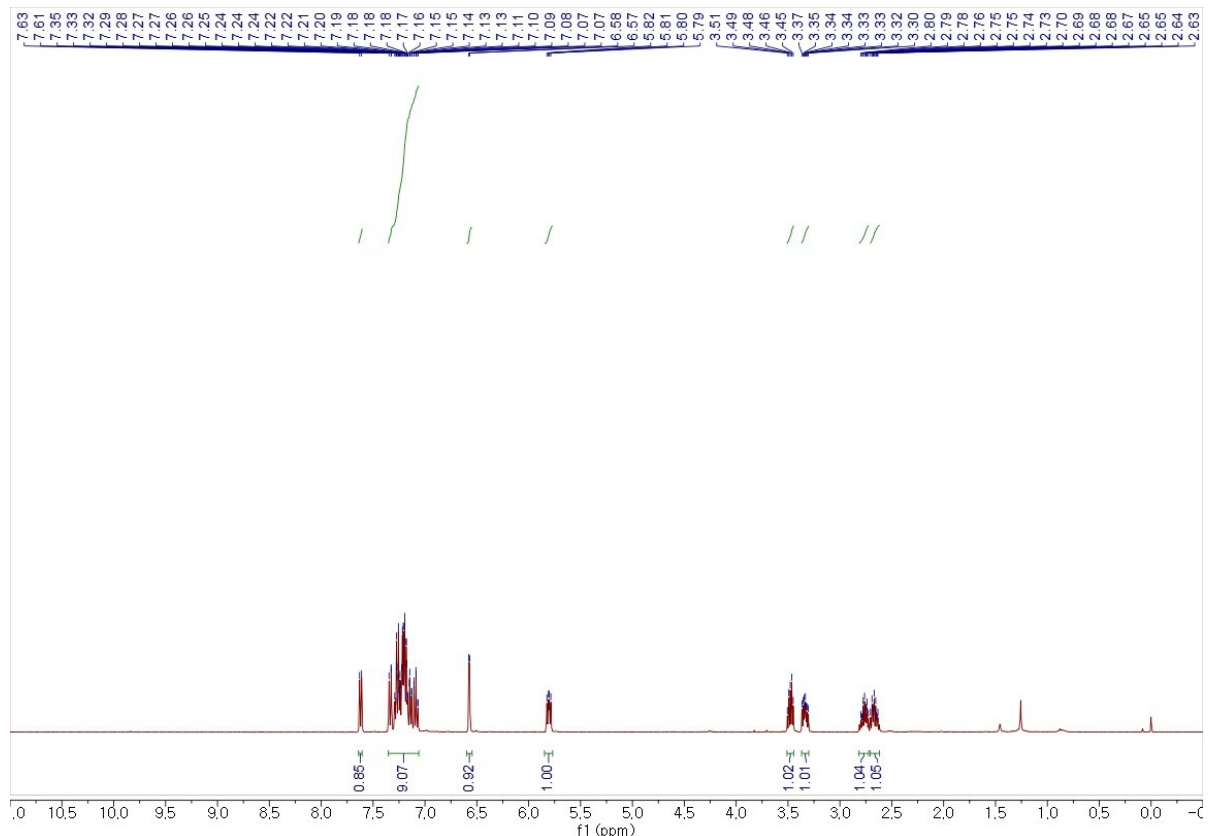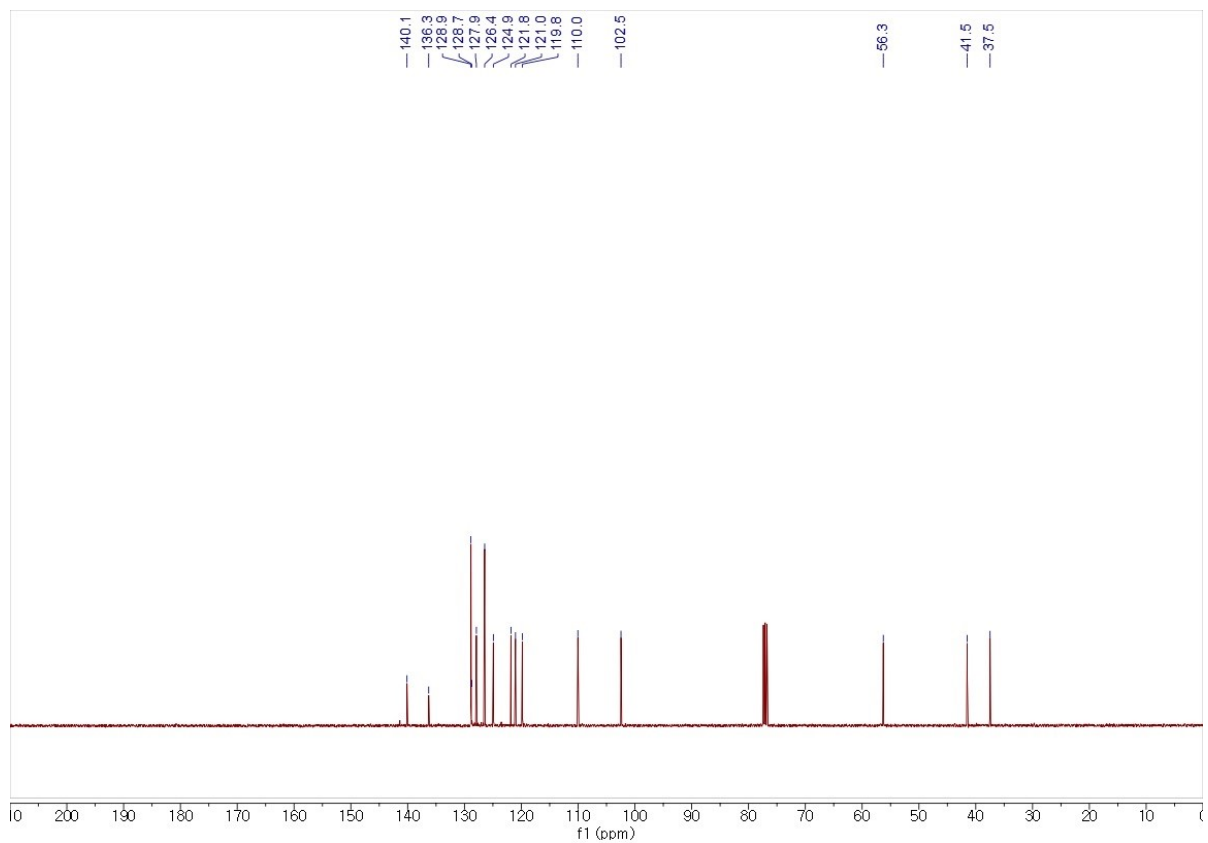

Supplement: d3nj05172b1.pdf [file d3nj05172b1.pdf]
